# Supplementary material
Source: PubMed Central journal article supplement (PMC3746964)
Supplement: NIHMS490872-supplement-1_si_001.pdf [file NIHMS490872-supplement-1_si_001.pdf]

Structural Investigations of the Nickel-Induced  
Inhibition of Truncated Constructs of the JMJD2  
Family of Histone Demethylases Using X-ray  
Absorption Spectroscopy

*Nitai Charan Giri,<sup>†</sup> Lisa Passantino,<sup>‡</sup> Hong Sun, Maria Antonietta Zoroddu,<sup>§</sup> Max Costa<sup>‡</sup>  
and Michael J. Maroney<sup>†\*</sup>*

**Supporting Information**

Figure S1: Purification of JMJD2A using MagneGST™ particles (Molecular weight markers (MW) are in kD. Lysate and flow through are indicated by L and FT respectively. Three times wash has been indicated by W1 – 3. Elution of pure protein is indicated by E1 and E2).

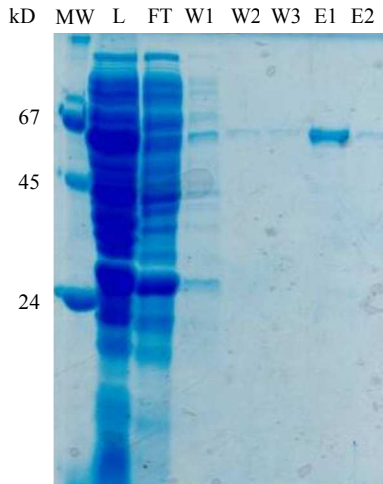

Figure S2: Cleavage of GST-tag from JMJD2A (Molecular weight markers (MW) are in kD. Cleaved and uncleaved protein are indicated by C and UC respectively).

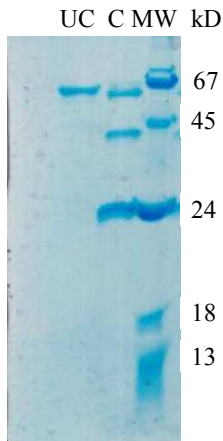

Figure S3: Purification of JMJD2A using gel-filtration column (Molecular weight (MW) markers are in kD. Different fractions are indicated by B2 – 12).

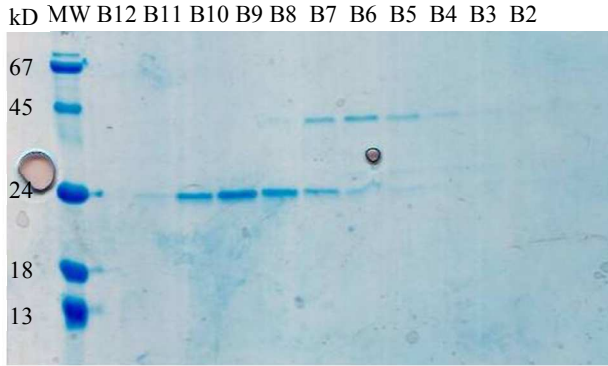

Figure S4: Activity assay of JMJD2A done by immunoblotting.

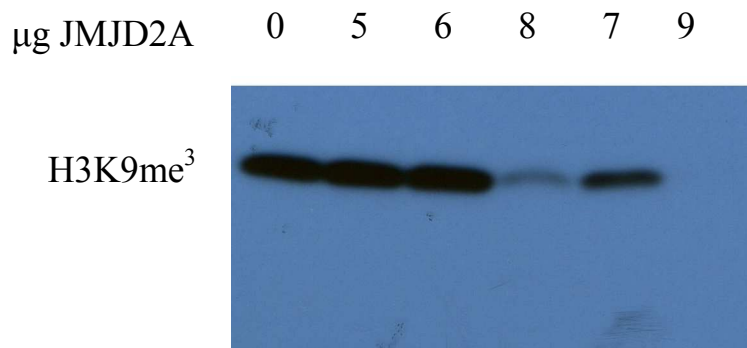

Figure S5: Purification of JMJD2C using Ni-NTA column (Molecular weight markers (MW) are in kD. Different fractions are indicated by 1 – 5).

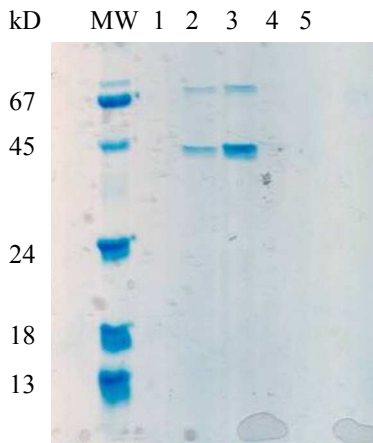

Figure S6: Purification of JMJD2C using gel-filtration column (Molecular weight markers (MW) are in kD).

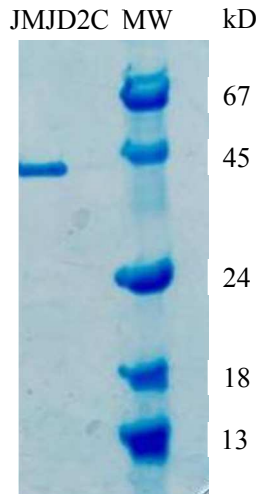

Figure S7: Cleavage of His<sub>6</sub>-tag from JMJD2C (Molecular weight markers (MW) are in kD. Cleaved and uncleaved proteins are indicated by C and UC respectively.).

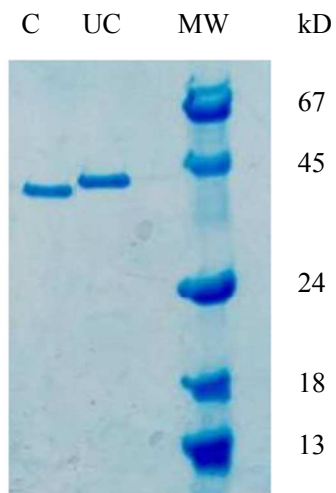

Figure S8: Activity assay of JMJD2C done by immunoblotting.

μg JMJD2C      0    6    7    8    9    10

H3K9me<sup>3</sup>

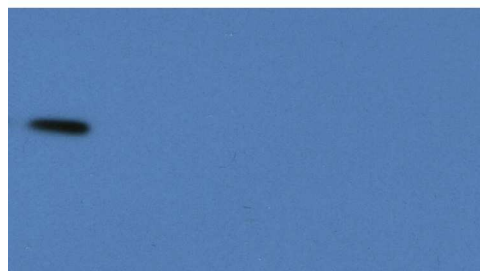

**Figure S9:** IC<sub>50</sub> for the inhibition of JMJD2C by Ni(II) ions is ~ 20.54  $\mu$ M. IC<sub>50</sub> value was calculated using GraphPad Prism 6 software (version 6.0a, July18, 2012) and a sigmoidal dose-response function.

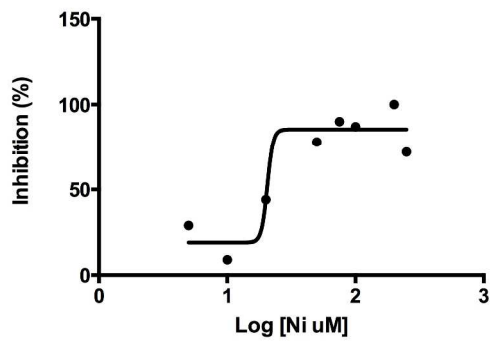

**Table S1.** EXAFS analysis of Fe(JMJD2A) ( $k = 2 - 12.5 \text{ \AA}^{-1}$  fit in r-space with values  $r = 1 - 4.5$ ). Fits included in the text Table 1 are shown in **bold type**.

| Shell | $r(\text{\AA})$ | $\sigma^2(\text{\AA}^2)$ | $\Delta E_0(\text{eV})$ | $\chi^2$ | Red $\chi^2$ | R      |
|-------|-----------------|--------------------------|-------------------------|----------|--------------|--------|
| 2 N/O | 2.07(2)         | 1(1)                     | -9(4)                   | 1070.82  | 53.37        | 0.2989 |
| 3 N/O | 2.07(2)         | 4(1)                     | -9(3)                   | 726.8    | 36.22        | 0.2028 |
| 4 N/O | 2.07(1)         | 6(1)                     | -10(2)                  | 573      | 28.55        | 0.1599 |
| 5 N/O | 2.07(1)         | 7(1)                     | -10(2)                  | 537.33   | 26.78        | 0.1499 |
| 6 N/O | 2.07(1)         | 9(1)                     | -11(2)                  | 574.19   | 28.61        | 0.1602 |
| 7 N/O | 2.07(2)         | 11(1)                    | -12(2)                  | 652.98   | 32.54        | 0.1822 |
| 2 S   | 2.16(2)         | 6(1)                     | -29(6)                  | 1043.3   | 52           | 0.2912 |
| 3 S   | 2.17(2)         | 9(1)                     | -28(4)                  | 803.58   | 40.05        | 0.2243 |
| 4 S   | 2.18(2)         | 11(1)                    | -28(4)                  | 694.43   | 34.61        | 0.1938 |
| 5 S   | 2.18(2)         | 13(1)                    | -28(3)                  | 654.33   | 32.61        | 0.1826 |
| 6 S   | 2.18(2)         | 15(1)                    | -28(3)                  | 652.77   | 32.53        | 0.1822 |
| 7 S   | 2.18(2)         | 17(1)                    | -28(2)                  | 673.11   | 33.54        | 0.1878 |
| 2 N/O | 2.04(2)         | 1(3)                     |                         |          |              |        |
| 1 N/O | 2.16(5)         | 0(5)                     | -9(3)                   | 657.31   | 36.38        | 0.1834 |
| 2 N/O | 2.03(2)         | 0(2)                     |                         |          |              |        |
| 2 N/O | 2.16(2)         | 2(3)                     | -8(2)                   | 505.04   | 27.95        | 0.1409 |
| 3 N/O | 2.05(2)         | 2(1)                     |                         |          |              |        |
| 1 N/O | 2.19(3)         | 0(3)                     | -9(2)                   | 508.76   | 28.16        | 0.142  |
| 4 N/O | 2.07(2)         | 4(1)                     |                         |          |              |        |
| 1 N/O | 2.22(4)         | 1(3)                     | -8(2)                   | 496.55   | 27.48        | 0.1386 |
| 3 N/O | 2.04(2)         | 3(2)                     |                         |          |              |        |
| 2 N/O | 2.19(3)         | 4(4)                     | -8(2)                   | 485.91   | 26.9         | 0.1356 |
| 5 N/O | 2.07(2)         | 7(1)                     |                         |          |              |        |
| 1 N/O | 2.55(3)         | 1(3)                     | -11(2)                  | 502.61   | 27.82        | 0.1403 |
| 4 N/O | 2.07(2)         | 6(1)                     |                         |          |              |        |

|       |         |        |         |         |       |        |
|-------|---------|--------|---------|---------|-------|--------|
| 2 N/O | 2.2(2)  | 26(33) | -9(4)   | 549.61  | 30.42 | 0.1534 |
| 3 N/O | 2.06(2) | 5(2)   |         |         |       |        |
| 3 N/O | 2.1(1)  | 18(11) | -9(3)   | 553.22  | 30.62 | 0.1544 |
| 6 N/O | 2.07(2) | 9(1)   |         |         |       |        |
| 1 N/O | 2.54(3) | 1(3)   | -12(2)  | 510.33  | 28.25 | 0.1424 |
| 5 N/O | 2.08(2) | 7(1)   |         |         |       |        |
| 2 N/O | 2.4(2)  | 38(60) | -9(3)   | 550.78  | 30.49 | 0.1537 |
| 4 N/O | 2.08(2) | 6(1)   |         |         |       |        |
| 3 N/O | 2.2(3)  | 44(58) | -9(6)   | 563.48  | 31.19 | 0.1572 |
| 2 S   | 2.16(2) | 6(1)   |         |         |       |        |
| 1 S   | 4.4(1)  | 5(12)  | -29(6)  | 1012.63 | 56.05 | 0.2826 |
| 2 S   | 2.15(2) | 4(1)   |         |         |       |        |
| 2 S   | 2.30(3) | 6(2)   | -23(3)  | 577.55  | 31.97 | 0.1612 |
| 3 S   | No fit  |        |         |         |       |        |
| 1 S   |         |        |         |         |       |        |
| 4 S   | No fit  |        |         |         |       |        |
| 1 S   |         |        |         |         |       |        |
| 3 S   | 2.16(4) | 9(1)   |         |         |       |        |
| 2 S   | 1.0(1)  | 62(29) | -32(10) | 615.72  | 34.08 | 0.1718 |
| 5 S   | No fit  |        |         |         |       |        |
| 1 S   |         |        |         |         |       |        |
| 4 S   | 2.17(2) | 11(1)  |         |         |       |        |
| 2 S   | 9(3)    | 0(245) | -28(4)  | 694.26  | 38.43 | 0.1938 |
| 3 S   | 2.16(2) | 8(2)   |         |         |       |        |
| 3 S   | 2.31(4) | 13(4)  | -23(4)  | 577.94  | 31.99 | 0.1613 |
| 6 S   | No fit  |        |         |         |       |        |
| 1 S   |         |        |         |         |       |        |
| 5 S   | 2.18(2) | 13(1)  |         |         |       |        |
| 2 S   | 5.2(1)  | 4(13)  | -28(4)  | 643.33  | 35.61 | 0.1795 |
| 4 S   | 2.18(2) | 11(2)  |         |         |       |        |
| 3 S   | 2.35(6) | 17(8)  | -23(4)  | 595.47  | 32.96 | 0.1662 |

---

|              |                    |                  |        |         |        |        |
|--------------|--------------------|------------------|--------|---------|--------|--------|
| 2 N/O<br>1 S | 2.03(2)<br>2.30(3) | 1(1)<br>5(3)     |        |         |        |        |
|              |                    |                  | -13(3) | 606.88  | 33.59  | 0.1694 |
| 1 N/O<br>2 S | 1.42(5)<br>2.17(3) | 8(6)<br>6(1)     |        |         |        |        |
|              |                    |                  | -28(6) | 948.91  | 52.53  | 0.2648 |
| 2 N/O<br>2 S | 2.03(2)<br>2.28(4) | 2(1)<br>12(3)    |        |         |        |        |
|              |                    |                  | -15(3) | 565.63  | 31.31  | 0.1578 |
| 3 N/O<br>1 S | 2.04(2)<br>2.32(4) | 4(1)<br>8(4)     |        |         |        |        |
|              |                    |                  | -12(3) | 523.93  | 29     | 0.1462 |
| 1 N/O<br>3 S | 2.51(3)<br>2.16(2) | 0(2)<br>8(1)     |        |         |        |        |
|              |                    |                  | -29(3) | 604.73  | 33.47  | 0.1688 |
| 1 N/O<br>4 S | No fit             |                  |        |         |        |        |
| 4 N/O<br>1 S | 2.09(2)<br>1.82(6) | 7(2)<br>25(12)   |        |         |        |        |
|              |                    |                  | -7(2)  | 508.71  | 28.16  | 0.142  |
| 2 N/O<br>3 S | 1.0(9)<br>2.17(3)  | 78(376)<br>9(1)  |        |         |        |        |
|              |                    |                  | -28(5) | 799.33  | 44.25  | 0.2231 |
| 3 N/O<br>2 S | 2.04(2)<br>2.29(5) | 5(1)<br>16(5)    |        |         |        |        |
|              |                    |                  | -14(3) | 537.88  | 29.77  | 0.1501 |
| 5 N/O<br>1 S | 2.08(2)<br>1.88(8) | 8(2)<br>30(26)   |        |         |        |        |
|              |                    |                  | -8(3)  | 522.56  | 28.92  | 0.1458 |
| 1 N/O<br>5 S | No fit             |                  |        |         |        |        |
| 4 N/O<br>2 S | 2.08(2)<br>2.5(2)  | 6(1)<br>40(30)   |        |         |        |        |
|              |                    |                  | -9(2)  | 527.15  | 29.18  | 0.1471 |
| 2 N/O<br>4 S | 1.55(7)<br>2.6(1)  | 24(12)<br>49(31) |        |         |        |        |
|              |                    |                  | 7(4)   | 2282.86 | 126.38 | 0.6372 |
| 3 N/O<br>3 S | 2.05(2)<br>2.27(6) | 5(2)<br>22(6)    |        |         |        |        |
|              |                    |                  | -15(4) | 542.05  | 30     | 0.1513 |
| 6 N/O<br>1 S | 2.07(2)<br>2.0(2)  | 9(2)<br>29(32)   |        |         |        |        |
|              |                    |                  | -10(3) | 544.65  | 30.15  | 0.152  |

---



|                                   |                            |                      |              |              |             |               |
|-----------------------------------|----------------------------|----------------------|--------------|--------------|-------------|---------------|
| 1 N/O<br>6 S                      | 2.10(2)<br>1.85(3)         | 0(2)<br>43(4)        |              |              |             |               |
|                                   |                            |                      | 2(2)         | 654.71       | 36.24       | 0.1827        |
| 5 N/O<br>2 S                      | 2.09(1)<br>2.68(3)         | 8(1)<br>15(4)        |              |              |             |               |
|                                   |                            |                      | -7(2)        | 467.35       | 25.87       | 0.1304        |
| 2 N/O<br>5 S                      | 2.12(8)<br>2.18(2)         | 8(5)<br>13(1)        |              |              |             |               |
|                                   |                            |                      | -28(4)       | 674.39       | 37.33       | 0.1882        |
| 4 N/O<br>3 S                      | 2.08(1)<br>2.5(1)          | 6(1)<br>44(24)       |              |              |             |               |
|                                   |                            |                      | -9(2)        | 517.83       | 28.66       | 0.1445        |
| 3 N/O<br>4 S                      | 0.9(4)<br>2.17(2)          | 83(369)<br>11(1)     |              |              |             |               |
|                                   |                            |                      | -28(5)       | 690.33       | 38.21       | 0.1927        |
| 3 N/O<br>1 N/O<br>(1 Im)          | 2.00(3)<br>2.13(2)         | 0(3)<br>4(3)         |              |              |             |               |
|                                   |                            |                      | -8(3)        | 175.41       | 19.57       | 0.0368        |
| 2 N/O<br>2 N/O<br>(2 Im)          | 2.03(2)<br>2.16(2)         | 0(1)<br>1(2)         |              |              |             |               |
|                                   |                            |                      | -8(2)        | 138.21       | 15.42       | 0.0376        |
| 1 N/O<br>3 N/O<br>(3 Im)          | 2.05(2)<br>2.19(3)         | 2(1)<br>0(3)         |              |              |             |               |
|                                   |                            |                      | -10(3)       | 163.76       | 18.27       | 0.0447        |
| 4 N/O<br>1 N/O<br>(1 Im)          | 2.00(4)<br>2.12(3)         | 2(3)<br>7(3)         |              |              |             |               |
|                                   |                            |                      | -9(3)        | 147.62       | 16.47       | 0.0402        |
| <b>3 N/O<br/>2 N/O<br/>(2 Im)</b> | <b>2.00(2)<br/>2.16(2)</b> | <b>2(2)<br/>5(2)</b> |              |              |             |               |
|                                   |                            |                      | <b>-9(2)</b> | <b>83.12</b> | <b>9.27</b> | <b>0.0227</b> |
| 2 N/O<br>3 N/O<br>(3 Im)          | 2.03(1)<br>2.17(2)         | 3(1)<br>3(2)         |              |              |             |               |
|                                   |                            |                      | -10(2)       | 102.25       | 11.41       | 0.0278        |
| 5 N/O<br>1 N/O<br>(1 Im)          | 2.06(5)<br>2.09(6)         | 3(4)<br>12(3)        |              |              |             |               |
|                                   |                            |                      | -10(5)       | 149.53       | 16.68       | 0.0314        |
| 4 N/O<br>2 N/O<br>(2 Im)          | 2.01(3)<br>2.16(5)         | 4(2)<br>11(5)        |              |              |             |               |
|                                   |                            |                      | -10(3)       | 127.88       | 14.27       | 0.0348        |

---

|        |         |       |        |        |       |        |
|--------|---------|-------|--------|--------|-------|--------|
| 3 N/O  | 2.02(2) | 5(2)  |        |        |       |        |
| 3 N/O  | 2.17(4) | 8(5)  | -10(3) | 107.96 | 12.04 | 0.0294 |
| (3 Im) |         |       |        |        |       |        |
| 6 N/O  | 2.06(3) | 2(2)  |        |        |       |        |
| 1 N/O  | 2.07(5) | 15(2) | -12(4) | 182.05 | 20.31 | 0.0382 |
| (1 Im) |         |       |        |        |       |        |
| 5 N/O  | 2.06(2) | 4(2)  |        |        |       |        |
| 2 N/O  | 2.10(8) | 18(4) | -11(5) | 153.59 | 17.14 | 0.0418 |
| (2 Im) |         |       |        |        |       |        |
| 4 N/O  | 2.06(1) | 6(1)  |        |        |       |        |
| 3 N/O  | 2.1(1)  | 20(7) | -11(5) | 122.35 | 13.65 | 0.0333 |
| (3 Im) |         |       |        |        |       |        |
| 4 N/O  | 2.07(1) | 6(1)  | -10(2) | 219.72 | 20.04 | 0.0598 |
| (1 Im) |         |       |        |        |       |        |
| 4 N/O  | 2.07(1) | 6(1)  | -11(2) | 202.97 | 18.51 | 0.0553 |
| (2 Im) |         |       |        |        |       |        |
| 4 N/O  | 2.06(1) | 6(1)  | -12(2) | 208.26 | 19    | 0.0567 |
| (3 Im) |         |       |        |        |       |        |
| 5 N/O  | 2.07(1) | 8(1)  | -11(1) | 165.9  | 15.13 | 0.0452 |
| (1 Im) |         |       |        |        |       |        |
| 5 N/O  | 2.07(1) | 8(1)  | -11(2) | 135.94 | 12.4  | 0.037  |
| (2 Im) |         |       |        |        |       |        |
| 5 N/O  | 2.07(1) | 8(1)  | -12(2) | 131.71 | 12.01 | 0.0358 |
| (3 Im) |         |       |        |        |       |        |
| 6 N/O  | 2.07(1) | 10(1) | -11(2) | 185.43 | 16.91 | 0.0505 |
| (1 Im) |         |       |        |        |       |        |
| 6 N/O  | 2.07(1) | 9(1)  | -11(2) | 133.42 | 12.17 | 0.0363 |
| (2 Im) |         |       |        |        |       |        |
| 6 N/O  | 2.07(1) | 9(1)  | -12(2) | 162.78 | 14.85 | 0.044  |
| (3 Im) |         |       |        |        |       |        |
| 7 N/O  | 2.08(2) | 11(1) | -11(2) | 239.09 | 21.18 | 0.0651 |
| (1 Im) |         |       |        |        |       |        |

---

---

|                          |                    |                |        |        |       |        |
|--------------------------|--------------------|----------------|--------|--------|-------|--------|
| 7 N/O<br>(2 Im)          | 2.08(2)            | 11(1)          | -12(2) | 170.46 | 15.55 | 0.0464 |
| 7 N/O<br>(3 Im)          | 2.07(1)            | 11(1)          | -12(2) | 142.33 | 12.98 | 0.0387 |
| 3 N/O<br>2 N/O<br>(2 Im) | 2.0(1)<br>2.1(1)   | 2(8)<br>10(28) | -9(5)  | 113.28 | 16.27 | 0.0308 |
| 1 O                      | 2.03(2)            | 0(17)          |        |        |       |        |
| 1 O                      | 2.14(2)            |                |        |        |       |        |
| 1 C                      | 2.81(2)            |                |        |        |       |        |
| 1 C                      | 2.94(2)            |                |        |        |       |        |
| 2 N/O<br>3 N/O<br>(3 Im) | 2.0(1)<br>2.1(2)   | 4(8)<br>7(9)   | -9(4)  | 120.65 | 17.33 | 0.0328 |
| 1 O                      | 2.00(2)            | 0(12)          |        |        |       |        |
| 1 O                      | 2.11(2)            |                |        |        |       |        |
| 1 C                      | 2.78(2)            |                |        |        |       |        |
| 1 C                      | 2.77(2)            |                |        |        |       |        |
| 3 N/O<br>3 N/O<br>(3 Im) | 2.04(4)<br>2.17(6) | 4(4)<br>9(24)  | -10(3) | 121.1  | 17.4  | 0.0338 |
| 1 O                      | 1.77(2)            | 8(20)          |        |        |       |        |
| 1 O                      | 1.88(2)            |                |        |        |       |        |
| 1 C                      | 2.55(2)            |                |        |        |       |        |
| 1 C                      | 2.64(2)            |                |        |        |       |        |
| 5 N/O<br>(2 Im)          | 2.08(1)            | 8(2)           | -10(3) | 128.7  | 14.36 | 0.035  |
| 1 O                      | 1.99(1)            | 23(34)         |        |        |       |        |
| 1 O                      | 2.10(1)            |                |        |        |       |        |
| 1 C                      | 2.77(1)            |                |        |        |       |        |
| 1 C                      | 2.86(1)            |                |        |        |       |        |
| 5 N/O<br>(3 Im)          | 2.07(2)            | 8(1)           | -12(3) | 117.56 | 13.12 | 0.032  |
| 1 O                      | 1.98(2)            | 27(17)         |        |        |       |        |
| 1 O                      | 1.89(2)            |                |        |        |       |        |
| 1 C                      | 2.67(2)            |                |        |        |       |        |
| 1 C                      | 2.76(2)            |                |        |        |       |        |
| 6 N/O                    | 2.06(2)            | 6(3)           | -10(2) | 116.74 | 13.03 | 0.0318 |

---

---

|        |         |      |        |        |       |        |
|--------|---------|------|--------|--------|-------|--------|
| (2 Im) |         |      |        |        |       |        |
| 1 O    | 2.02(4) | 0(5) |        |        |       |        |
| 1 O    | 2.13(4) |      |        |        |       |        |
| 1 C    | 2.80(4) |      |        |        |       |        |
| 1 C    | 2.89(4) |      |        |        |       |        |
| 7 N/O  | 2.08(2) | 7(2) | -10(2) | 112.17 | 12.51 | 0.0305 |
| (3 Im) |         |      |        |        |       |        |
| 1 O    | 1.98(4) | 1(4) |        |        |       |        |
| 1 O    | 2.09(4) |      |        |        |       |        |
| 1 C    | 2.76(4) |      |        |        |       |        |
| 1 C    | 2.85(4) |      |        |        |       |        |

---

**Table S2.** EXAFS analysis of Fe(JMJD2A)- $\alpha$ KG ( $k = 2 - 12 \text{ \AA}^{-1}$  fit in r-space with values  $r = 1 - 4.5$ ). Fits included in the text Table 1 are shown in **bold type**.

| Shell | $r(\text{\AA})$ | $\sigma^2(\text{\AA}^2)$ | $\Delta E_0(\text{eV})$ | $\chi^2$ | Red $\chi^2$ | R      |
|-------|-----------------|--------------------------|-------------------------|----------|--------------|--------|
| 2 N/O | 2.08(2)         | 0(1)                     | -5(5)                   | 274.3    | 14.46        | 0.2958 |
| 3 N/O | 2.07(2)         | 1(1)                     | -7(3)                   | 202.84   | 10.69        | 0.2187 |
| 4 N/O | 2.07(2)         | 3(1)                     | -8(3)                   | 180.17   | 9.5          | 0.1943 |
| 5 N/O | 2.06(2)         | 5(1)                     | -9(3)                   | 178.78   | 9.42         | 0.1928 |
| 6 N/O | 2.06(2)         | 7(1)                     | -10(3)                  | 189.12   | 9.97         | 0.2039 |
| 7 N/O | 2.05(2)         | 8(1)                     | -12(3)                  | 205.8    | 10.85        | 0.2219 |
| 2 S   | 2.17(2)         | 4(1)                     | -25(5)                  | 217.44   | 11.46        | 0.2345 |
| 3 S   | 2.16(2)         | 7(1)                     | -27(4)                  | 187.62   | 9.89         | 0.2023 |
| 4 S   | 2.16(2)         | 9(1)                     | -28(4)                  | 181.48   | 9.57         | 0.1957 |
| 5 S   | 2.15(2)         | 11(1)                    | -29(4)                  | 185.62   | 9.79         | 0.2001 |
| 6 S   | 2.15(2)         | 13(1)                    | -31(4)                  | 194.57   | 10.26        | 0.2098 |
| 7 S   | 2.15(3)         | 14(1)                    | -32(5)                  | 205.77   | 10.85        | 0.2219 |
| 2 N/O | 2.1(2)          | 2(17)                    |                         |          |              |        |
| 1 N/O | 2.1(3)          | 0(11)                    | -7(5)                   | 199.53   | 11.76        | 0.2151 |
| 2 N/O | 2.12(4)         | 0(4)                     |                         |          |              |        |
| 2 N/O | 1.97(7)         | 4(9)                     | -10(4)                  | 162.69   | 9.59         | 0.1754 |
| 3 N/O | 2.08(2)         | 0(2)                     |                         |          |              |        |
| 1 N/O | 1.94(5)         | 0(5)                     | -10(3)                  | 155.59   | 9.17         | 0.1678 |
| 4 N/O | 2.08(2)         | 3(1)                     |                         |          |              |        |
| 1 N/O | 2.40(5)         | 3(6)                     | -6(3)                   | 166.75   | 9.83         | 0.1798 |
| 3 N/O | 2.09(2)         | 2(2)                     |                         |          |              |        |
| 2 N/O | 1.94(3)         | 4(4)                     | -12(3)                  | 139.66   | 8.23         | 0.1506 |
| 5 N/O | 2.08(2)         | 6(1)                     |                         |          |              |        |
| 1 N/O | 2.40(3)         | 0(3)                     | -7(3)                   | 149.41   | 8.81         | 0.1611 |

|       |         |        |        |        |       |        |
|-------|---------|--------|--------|--------|-------|--------|
| 4 N/O | 2.09(2) | 3(1)   |        |        |       |        |
| 2 N/O | 2.38(7) | 13(12) | -5(3)  | 166.98 | 9.84  | 0.18   |
| 3 N/O | 2.09(2) | 2(2)   |        |        |       |        |
| 3 N/O | 1.93(3) | 4(3)   | -15(3) | 142.23 | 8.38  | 0.1533 |
| 6 N/O | 2.08(2) | 7(1)   |        |        |       |        |
| 1 N/O | 2.39(3) | 0(3)   | -9(3)  | 144.45 | 8.51  | 0.1557 |
| 5 N/O | 2.09(2) | 5(1)   |        |        |       |        |
| 2 N/O | 2.40(4) | 7(6)   | -6(3)  | 152.56 | 8.99  | 0.1645 |
| 4 N/O | 2.09(2) | 3(1)   |        |        |       |        |
| 3 N/O | 2.37(7) | 19(13) | -4(3)  | 164.89 | 9.72  | 0.1778 |
| 2 S   | 2.15(2) | 1(1)   |        |        |       |        |
| 1 S   | 2.01(3) | 1(2)   | -35(5) | 153.08 | 9.02  | 0.165  |
| 2 S   | 2.16(2) | 1(1)   |        |        |       |        |
| 2 S   | 2.02(3) | 4(2)   | -38(5) | 137.11 | 8.08  | 0.1478 |
| 3 S   | 2.17(2) | 7(1)   |        |        |       |        |
| 1 S   | 1.65(6) | 14(5)  | -26(5) | 154.24 | 9.09  | 0.1663 |
| 4 S   | 2.17(3) | 9(1)   |        |        |       |        |
| 1 S   | 0.3(1)  | 62(30) | -26(5) | 177.42 | 10.46 | 0.1913 |
| 3 S   | 2.17(2) | 7(1)   |        |        |       |        |
| 2 S   | 2.97(3) | 8(3)   | -24(4) | 135.24 | 7.97  | 0.1458 |
| 5 S   | 2.16(3) | 11(1)  |        |        |       |        |
| 1 S   | 0.3(1)  | 81(65) | -28(6) | 183.93 | 10.84 | 0.1983 |
| 4 S   | 2.17(3) | 9(1)   |        |        |       |        |
| 2 S   | 1.7(1)  | 32(16) | -26(7) | 174.31 | 10.27 | 0.1879 |
| 3 S   | 2.17(3) | 7(1)   |        |        |       |        |
| 3 S   | 1.7(1)  | 32(9)  | -24(7) | 164.43 | 9.69  | 0.1773 |
| 6 S   | No fit  |        |        |        |       |        |
| 1 S   |         |        |        |        |       |        |
| 5 S   | 2.20(2) | 9(1)   |        |        |       |        |
| 2 S   | 2.45(3) | 9(4)   | -21(4) | 149.15 | 8.79  | 0.1608 |

|       |         |        |        |        |       |        |
|-------|---------|--------|--------|--------|-------|--------|
| 4 S   | 2.19(2) | 8(1)   |        |        |       |        |
| 3 S   | 2.43(4) | 15(6)  | -19(4) | 151.31 | 8.92  | 0.1631 |
| 2 N/O | 1.92(4) | 3(3)   |        |        |       |        |
| 1 S   | 2.18(2) | 0(1)   | -26(6) | 159.65 | 9.41  | 0.1721 |
| 1 N/O | 1.49(3) | 5(3)   |        |        |       |        |
| 2 S   | 2.18(2) | 4(1)   | -23(5) | 167.69 | 9.88  | 0.1808 |
| 2 N/O | 1.86(3) | 3(2)   |        |        |       |        |
| 2 S   | 2.16(2) | 3(1)   | -31(4) | 133.64 | 7.88  | 0.1441 |
| 3 N/O | 1.94(4) | 6(3)   |        |        |       |        |
| 1 S   | 2.19(2) | 0(1)   | -24(5) | 139.16 | 8.2   | 0.15   |
| 1 N/O | 2.7(1)  | 8(19)  |        |        |       |        |
| 3 S   | 2.17(2) | 7(1)   | -26(5) | 175.95 | 10.37 | 0.1897 |
| 1 N/O | No fit  |        |        |        |       |        |
| 4 S   |         |        |        |        |       |        |
| 4 N/O | 1.93(4) | 8(3)   |        |        |       |        |
| 1 S   | 2.18(2) | 0(1)   | -26(5) | 133.09 | 7.84  | 0.1435 |
| 2 N/O | 4.6(1)  | 2(13)  |        |        |       |        |
| 3 S   | 2.16(2) | 7(1)   | -27(5) | 184.03 | 10.85 | 0.1984 |
| 3 N/O | 1.87(3) | 6(2)   |        |        |       |        |
| 2 S   | 2.16(2) | 3(1)   | -32(5) | 134.6  | 7.93  | 0.1451 |
| 5 N/O | 2.07(2) | 6(2)   |        |        |       |        |
| 1 S   | 1.8(1)  | 32(39) | -8(4)  | 172.62 | 10.17 | 0.1861 |
| 1 N/O | No fit  |        |        |        |       |        |
| 5 S   |         |        |        |        |       |        |
| 4 N/O | 2.08(6) | 5(7)   |        |        |       |        |
| 2 S   | 2.17(5) | 9(13)  | -15(4) | 172.22 | 10.15 | 0.1857 |
| 2 N/O | 0.71(3) | 2(5)   |        |        |       |        |
| 4 S   | 2.16(2) | 9(1)   | -28(4) | 174.63 | 10.29 | 0.1883 |
| 3 N/O | 1.83(3) | 7(3)   |        |        |       |        |
| 3 S   | 2.15(2) | 5(1)   | -34(5) | 146.94 | 8.66  | 0.1584 |

|                                   |                            |                      |               |              |             |               |
|-----------------------------------|----------------------------|----------------------|---------------|--------------|-------------|---------------|
| 6 N/O<br>1 S                      | 2.07(2)<br>1.26(5)         | 7(1)<br>17(8)        | -8(3)         | 163.62       | 9.64        | 0.1764        |
| 1 N/O<br>6 S                      | 3.7(1)<br>2.15(3)          | 0(10)<br>13(1)       | -31(5)        | 192.15       | 11.32       | 0.2072        |
| 5 N/O<br>2 S                      | 2.1(1)<br>2.14(8)          | 4(4)<br>8(16)        | -13(5)        | 161.97       | 9.55        | 0.1746        |
| 2 N/O<br>5 S                      | 1.48(9)<br>2.16(3)         | 18(13)<br>11(1)      | -27(5)        | 181          | 10.67       | 0.1952        |
| 4 N/O<br>3 S                      | 2.08(7)<br>2.15(4)         | 5(4)<br>11(10)       | -19(4)        | 171.76       | 10.12       | 0.1852        |
| 3 N/O<br>4 S                      | 2.30(3)<br>2.03(6)         | 0(1)<br>14(2)        | -52(9)        | 149.45       | 8.81        | 0.1611        |
| 4 N/O<br>2 N/O<br>(2 Im)          | 2.07(3)<br>2.2(3)          | 4(1)<br>33(126)      | -8(9)         | 108.11       | 12.06       | 0.1166        |
| 6 N/O<br>(2 Im)                   | 2.06(2)                    | 7(1)                 | -10(3)        | 127.48       | 11.63       | 0.1374        |
| <b>3 N/O<br/>2 N/O<br/>(2 Im)</b> | <b>2.09(2)<br/>1.93(4)</b> | <b>2(2)<br/>4(4)</b> | <b>-12(4)</b> | <b>70.68</b> | <b>7.88</b> | <b>0.0762</b> |
| 5 N/O<br>(2 Im)                   | 2.07(2)                    | 5(1)                 | -8(3)         | 130.85       | 11.93       | 0.1411        |
| 5 N/O<br>2 N/O<br>(2 Im)          | 2.05(2)<br>1.88(3)         | 3(2)<br>2(2)         | -17(3)        | 81.73        | 9.12        | 0.0881        |
| 7 N/O<br>(2 Im)                   | 2.06(2)                    | 9(1)                 | -11(3)        | 133.75       | 12.2        | 0.1442        |
| 4 N/O<br>1 N/O<br>(1 Im)          | 2.08(3)<br>1.0(2)          | 3(5)<br>5(21)        | -9(4)         | 106.97       | 11.9        | 0.1153        |
| 6 N/O<br>(1 Im)                   | 2.06(2)                    | 7(1)                 | -10(3)        | 134.4        | 12.26       | 0.1449        |



|                          |                    |                 |             |              |             |               |
|--------------------------|--------------------|-----------------|-------------|--------------|-------------|---------------|
| 5 N/O<br>1 N/O<br>(1 Im) | 2.06(2)<br>1.88(4) | 3(1)<br>0(3)    | -13(3)      | 91.71        | 10.23       | 0.0989        |
| 5 N/O<br>(1 Im)          | 2.06(2)            | 5(1)            | -9(3)       | 122.06       | 11.13       | 0.1316        |
| 6 N/O<br>1N/O<br>(1 Im)  | 2.06(2)<br>2.0(6)  | 7(3)<br>25(151) | -11(7)      | 134.02       | 14.95       | 0.1445        |
| 7 N/O<br>(1 Im)          | 2.06(2)            | 9(2)            | -11(3)      | 143.24       | 13.06       | 0.1544        |
| 3 N/O<br>3 N/O<br>(3 Im) | 2.08(2)<br>1.94(3) | 2(2)<br>4(3)    | -15(3)      | 82.04        | 9.15        | 0.0884        |
| 6 N/O<br>(3 Im)          | 2.06(2)            | 7(1)            | -11(3)      | 114.65       | 10.46       | 0.1236        |
| 2 N/O<br>3 N/O<br>(3 Im) | 2.09(3)<br>1.99(4) | 3(3)<br>5(5)    | -12(4)      | 79.07        | 8.82        | 0.0852        |
| 5 N/O<br>(3 Im)          | 2.06(2)            | 5(1)            | -10(3)      | 113.85       | 10.38       | 0.1227        |
| 4 N/O<br>3N/O<br>(3 Im)  | 2.06(5)<br>2.2(8)  | 4(1)<br>44(207) | -9(18)      | 113.52       | 12.67       | 0.1224        |
| 7 N/O<br>(3 Im)          | 2.05(2)            | 9(1)            | -12(3)      | 132.97       | 12.13       | 0.1434        |
| <b>3 N/O<br/>(2 Im)</b>  | <b>2.05(2)</b>     | <b>1(1)</b>     | <b>0(4)</b> | <b>45.96</b> | <b>4.03</b> | <b>0.0495</b> |
| <b>1 O</b>               | <b>1.90(3)</b>     | <b>2(2)</b>     |             |              |             |               |
| <b>1 O</b>               | <b>2.11(3)</b>     |                 |             |              |             |               |
| <b>1 C</b>               | <b>2.62(3)</b>     |                 |             |              |             |               |
| <b>1 C</b>               | <b>2.72(3)</b>     |                 |             |              |             |               |
| 2 N/O<br>1 N/O<br>(2 Im) | 2.06(8)<br>2.1(2)  | 3(1)<br>0(5)    | -2(7)       | 70           | 10.05       | 0.0755        |
| 1 O                      | 1.89(5)            | 6(6)            |             |              |             |               |

|                 |         |        |       |        |       |        |
|-----------------|---------|--------|-------|--------|-------|--------|
| 1 O             | 2.10(5) |        |       |        |       |        |
| 1 C             | 2.61(5) |        |       |        |       |        |
| 1 C             | 2.71(5) |        |       |        |       |        |
| 5 N/O<br>(2 Im) | 2.07(3) | 4(1)   | 4(6)  | 112.13 | 12.51 | 0.1209 |
| 1 O             | 2.0(2)  | 11(15) |       |        |       |        |
| 1 O             | 2.2(2)  |        |       |        |       |        |
| 1 C             | 2.7(2)  |        |       |        |       |        |
| 1 C             | 2.8(2)  |        |       |        |       |        |
| 4 N/O           | 2.05(3) | 2(2)   | 0(8)  | 70.26  | 10.09 | 0.0757 |
| 1 N/O<br>(2 Im) | 1.8(4)  | 26(64) |       |        |       |        |
| 1 O             | 1.91(3) | 3(3)   |       |        |       |        |
| 1 O             | 2.12(3) |        |       |        |       |        |
| 1 C             | 2.63(3) |        |       |        |       |        |
| 1 C             | 2.73(3) |        |       |        |       |        |
| 3 N/O           | 2.1(1)  | 10(1)  | -3(6) | 85.51  | 12.28 | 0.0922 |
| 2 N/O<br>(2 Im) | 2.07(6) | 4(4)   |       |        |       |        |
| 1 O             | 1.89(8) | 6(6)   |       |        |       |        |
| 1 O             | 2.10(8) |        |       |        |       |        |
| 1 C             | 2.61(8) |        |       |        |       |        |
| 1 C             | 2.71(8) |        |       |        |       |        |
| 3 N/O<br>(3 Im) | 2.08(3) | 1(1)   | 5(6)  | 99.08  | 11.05 | 0.1068 |
| 1 O             | 2.0(1)  | 9(6)   |       |        |       |        |
| 1 O             | 2.2(1)  |        |       |        |       |        |
| 1 C             | 2.7(1)  |        |       |        |       |        |
| 1 C             | 2.8(1)  |        |       |        |       |        |
| 2 N/O           | 2.05(8) | 2(1)   | -3(5) | 71.21  | 10.24 | 0.0768 |
| 1 N/O<br>(3 Im) | 2.1(2)  | 0(3)   |       |        |       |        |
| 1 O             | 1.89(4) | 5(5)   |       |        |       |        |
| 1 O             | 2.10(4) |        |       |        |       |        |
| 1 C             | 2.61(4) |        |       |        |       |        |
| 1 C             | 2.71(4) |        |       |        |       |        |
| 5 N/O<br>(3 Im) | 2.07(2) | 5(2)   | 4(5)  | 105.38 | 11.76 | 0.1136 |
| 1 O             | 1.8(1)  | 10(31) |       |        |       |        |
| 1 O             | 2.1(1)  |        |       |        |       |        |

|     |        |
|-----|--------|
| 1 C | 2.6(1) |
| 1 C | 2.7(1) |

---

**Table S3.** EXAFS analysis of Fe(JMJD2A)- $\alpha$ KG + substrate ( $k = 2 - 12.5 \text{ \AA}^{-1}$  fit in r-space with values  $r = 1 - 4.5$ ). Fits included in the text Table 1 are shown in **bold type**.

| Shell | $r(\text{\AA})$ | $\sigma^2(\text{\AA}^2)$ | $\Delta E_0(\text{eV})$ | $\chi^2$ | Red $\chi^2$ | R      |
|-------|-----------------|--------------------------|-------------------------|----------|--------------|--------|
| 2 N/O | 2.03(2)         | 3(2)                     | -8(4)                   | 918.88   | 45.79        | 0.3242 |
| 3 N/O | 2.04(2)         | 5(1)                     | -9(3)                   | 637.98   | 31.79        | 0.2251 |
| 4 N/O | 2.04(2)         | 7(1)                     | -9(2)                   | 515.13   | 25.67        | 0.1817 |
| 5 N/O | 2.04(2)         | 9(1)                     | -10(2)                  | 490.19   | 24.43        | 0.1729 |
| 6 N/O | 2.04(2)         | 11(1)                    | -10(2)                  | 524.62   | 26.14        | 0.1851 |
| 7 N/O | 2.04(2)         | 13(2)                    | -11(2)                  | 592.58   | 29.53        | 0.2091 |
| 2 S   | 2.13(3)         | 7(1)                     | -29(6)                  | 915.98   | 45.65        | 0.3232 |
| 3 S   | 2.13(3)         | 10(1)                    | -28(5)                  | 717.8    | 35.77        | 0.2533 |
| 4 S   | 2.14(2)         | 12(1)                    | -28(4)                  | 624.88   | 31.14        | 0.2205 |
| 5 S   | 2.14(2)         | 14(1)                    | -28(4)                  | 587.32   | 29.27        | 0.2072 |
| 6 S   | 2.15(2)         | 16(1)                    | -28(4)                  | 580.67   | 28.94        | 0.2049 |
| 7 S   | 2.15(3)         | 18(1)                    | -28(4)                  | 591.8    | 29.49        | 0.2088 |
| 2 N/O | 2.02(2)         | 1(2)                     |                         |          |              |        |
| 1 N/O | 2.16(4)         | 0(4)                     | -5(3)                   | 552.3    | 30.57        | 0.1949 |
| 2 N/O | 1.99(2)         | 0(1)                     |                         |          |              |        |
| 2 N/O | 2.13(2)         | 1(2)                     | -7(2)                   | 435.07   | 24.08        | 0.1535 |
| 3 N/O | 2.02(2)         | 3(1)                     |                         |          |              |        |
| 1 N/O | 2.16(3)         | 0(3)                     | -8(2)                   | 427.69   | 23.67        | 0.1509 |
| 4 N/O | 2.03(2)         | 5(1)                     |                         |          |              |        |
| 1 N/O | 2.18(3)         | 3(3)                     | -8(2)                   | 413.26   | 22.87        | 0.1458 |
| 3 N/O | 2.01(2)         | 3(2)                     |                         |          |              |        |
| 2 N/O | 2.15(3)         | 3(3)                     | -8(2)                   | 433.82   | 24.01        | 0.153  |
| 5 N/O | 2.04(2)         | 9(2)                     |                         |          |              |        |
| 1 N/O | 2.3(2)          | 24(59)                   | -8(3)                   | 494.91   | 27.39        | 0.1746 |

|       |         |         |        |        |       |        |
|-------|---------|---------|--------|--------|-------|--------|
| 4 N/O | 2.02(2) | 6(2)    |        |        |       |        |
| 2 N/O | 2.18(6) | 9(8)    | -8(2)  | 489.13 | 27.07 | 0.1726 |
| 3 N/O | 2.02(3) | 5(2)    |        |        |       |        |
| 3 N/O | 2.15(6) | 13(9)   | -7(2)  | 492.78 | 27.28 | 0.1739 |
| 6 N/O | 2.05(2) | 11(2)   |        |        |       |        |
| 1 N/O | 2.4(2)  | 10(36)  | -9(3)  | 518.8  | 28.72 | 0.183  |
| 5 N/O | 2.05(2) | 9(2)    |        |        |       |        |
| 2 N/O | 2.3(1)  | 33(48)  | -7(3)  | 503.81 | 27.89 | 0.1777 |
| 4 N/O | 2.05(2) | 7(2)    |        |        |       |        |
| 3 N/O | 2.2(1)  | 34(33)  | -7(3)  | 509.74 | 28.21 | 0.1798 |
| 2 S   | 2.11(2) | 4(1)    |        |        |       |        |
| 1 S   | 2.26(3) | 2(2)    | -25(4) | 587.24 | 32.5  | 0.2072 |
| 2 S   | 2.10(2) | 5(2)    |        |        |       |        |
| 2 S   | 2.25(3) | 6(2)    | -24(4) | 522.06 | 28.9  | 0.1842 |
| 3 S   | 2.13(2) | 10(1)   |        |        |       |        |
| 1 S   | 4.31(6) | 2(5)    | -30(5) | 679.8  | 37.63 | 0.2398 |
| 4 S   | 2.13(2) | 12(1)   |        |        |       |        |
| 1 S   | 3.48(3) | 3(3)    | -30(4) | 451.8  | 25.01 | 0.1594 |
| 3 S   | 2.12(2) | 8(2)    |        |        |       |        |
| 2 S   | 2.28(4) | 8(3)    | -24(4) | 505.78 | 28    | 0.1784 |
| 5 S   | 2.15(3) | 12(1)   |        |        |       |        |
| 1 S   | 2.34(5) | 6(4)    | -24(4) | 521.11 | 28.84 | 0.1839 |
| 4 S   | 2.17(2) | 13(1)   |        |        |       |        |
| 2 S   | 3.08(4) | 10(4)   | -22(3) | 502.83 | 27.83 | 0.1774 |
| 3 S   | 2.12(3) | 9(2)    |        |        |       |        |
| 3 S   | 2.29(4) | 13(4)   | -23(4) | 502.61 | 27.82 | 0.1773 |
| 6 S   | No fit  |         |        |        |       |        |
| 1 S   |         |         |        |        |       |        |
| 5 S   | 2.14(3) | 14(1)   |        |        |       |        |
| 2 S   | 1.1(6)  | 60(110) | -28(5) | 579.59 | 32.08 | 0.2045 |

|       |         |        |        |        |       |        |
|-------|---------|--------|--------|--------|-------|--------|
| 4 S   | 2.14(3) | 11(2)  |        |        |       |        |
| 3 S   | 2.32(5) | 15(6)  | -22(4) | 511.43 | 28.31 | 0.1804 |
| 2 N/O | 1.99(2) | 2(1)   |        |        |       |        |
| 1 S   | 2.26(3) | 6(3)   | -13(3) | 528.4  | 29.25 | 0.1864 |
| 1 N/O | 1.96(2) | 0(2)   |        |        |       |        |
| 2 S   | 2.21(3) | 9(2)   | -18(4) | 574.82 | 31.82 | 0.2028 |
| 2 N/O | 1.98(2) | 3(1)   |        |        |       |        |
| 2 S   | 2.25(4) | 12(3)  | -15(3) | 492.64 | 27.27 | 0.1738 |
| 3 N/O | 2.00(2) | 5(1)   |        |        |       |        |
| 1 S   | 2.29(4) | 8(4)   | -12(3) | 471.63 | 26.11 | 0.1664 |
| 1 N/O | 3.88(8) | 0(7)   |        |        |       |        |
| 3 S   | 2.14(3) | 10(1)  | -28(5) | 699.06 | 38.7  | 0.2466 |
| 1 N/O | No fit  |        |        |        |       |        |
| 4 S   |         |        |        |        |       |        |
| 4 N/O | 2.02(2) | 7(2)   |        |        |       |        |
| 1 S   | 2.30(8) | 15(9)  | -11(3) | 474.65 | 26.27 | 0.1675 |
| 2 N/O | 0.86(5) | 5(5)   |        |        |       |        |
| 3 S   | 2.13(2) | 10(1)  | -29(4) | 686.03 | 37.97 | 0.242  |
| 3 N/O | 2.00(2) | 6(2)   |        |        |       |        |
| 2 S   | 2.28(6) | 18(6)  | -13(3) | 475.4  | 26.31 | 0.1677 |
| 5 N/O | 2.05(2) | 12(4)  |        |        |       |        |
| 1 S   | 1.83(3) | 15(6)  | -5(2)  | 429.36 | 23.76 | 0.1515 |
| 1 N/O | No fit  |        |        |        |       |        |
| 5 S   |         |        |        |        |       |        |
| 4 N/O | 2.04(2) | 7(1)   |        |        |       |        |
| 2 S   | 2.5(2)  | 43(34) | -8(3)  | 475.45 | 26.32 | 0.1677 |
| 2 N/O | No fit  |        |        |        |       |        |
| 4 S   |         |        |        |        |       |        |
| 3 N/O | 2.01(2) | 6(2)   |        |        |       |        |
| 3 S   | 2.27(7) | 24(7)  | -14(4) | 479.08 | 26.52 | 0.169  |
| 6 N/O | 2.04(2) | 15(5)  |        |        |       |        |

|                                   |                            |                      |              |               |              |               |
|-----------------------------------|----------------------------|----------------------|--------------|---------------|--------------|---------------|
| 1 S                               | 1.84(3)                    | 12(5)                | -6(2)        | 443.69        | 24.56        | 0.1565        |
| 1 N/O<br>6 S                      | 1.67(6)<br>2.12(3)         | 10(8)<br>15(1)       | -32(5)       | 561.03        | 31.05        | 0.1979        |
| 5 N/O<br>2 S                      | 2.04(2)<br>2.3(9)          | 9(1)<br>85(292)      | -10(5)       | 483.67        | 26.77        | 0.1706        |
| 2 N/O<br>5 S                      | No fit                     |                      |              |               |              |               |
| 4 N/O<br>3 S                      | 2.04(2)<br>2.5(1)          | 7(1)<br>47(28)       | -8(3)        | 466.47        | 25.82        | 0.1646        |
| 3 N/O<br>4 S                      | 2.53(9)<br>2.13(3)         | 12(8)<br>12(1)       | -29(5)       | 541.06        | 29.95        | 0.1909        |
| 3 N/O<br>1 N/O<br>(1 Im)          | 1.98(3)<br>2.09(3)         | 0(3)<br>6(3)         | -7(4)        | 256.76        | 25.51        | 0.0906        |
| 2 N/O<br>2 N/O                    | 1.97(1)<br>2.13(2)         | 2(1)<br>1(1)         | -9(2)        | 120.43        | 11.96        | 0.0424        |
| (2 Im)                            |                            |                      |              |               |              |               |
| 1 N/O<br>3 N/O<br>(3 Im)          | 2.02(1)<br>2.17(3)         | 3(1)<br>0(2)         | -7(2)        | 139.93        | 13.9         | 0.0493        |
| 4 N/O<br>1 N/O<br>(1 Im)          | 1.96(3)<br>2.09(3)         | 2(2)<br>11(4)        | -9(3)        | 172.56        | 17.14        | 0.0608        |
| 4 N/O<br>1 N/O<br>(1 Im)          | 1.95(3)<br>2.09(2)         | 1(2)<br>9(3)         | -9(2)        | 163.73        | 16.26        | 0.0577        |
| <b>3 N/O<br/>2 N/O<br/>(2 Im)</b> | <b>1.98(2)<br/>2.13(3)</b> | <b>2(2)<br/>6(3)</b> | <b>-8(2)</b> | <b>114.28</b> | <b>11.35</b> | <b>0.0402</b> |
| 2 N/O<br>3 N/O                    | 2.00(1)<br>2.14(2)         | 3(1)<br>3(2)         | -9(2)        | 178.81        | 17.76        | 0.0631        |

|                          |                    |              |             |              |             |               |
|--------------------------|--------------------|--------------|-------------|--------------|-------------|---------------|
| (3 Im)                   |                    |              |             |              |             |               |
| 4 N/O<br>(1 Im)          | 2.03(1)            | 7(1)         | -10(2)      | 228.98       | 18.98       | 0.0808        |
| 4 N/O<br>(2 Im)          | 2.03(1)            | 7(1)         | -10(2)      | 170.29       | 14.11       | 0.06          |
| 4 N/O<br>(3 Im)          | 2.02(1)            | 7(1)         | -12(2)      | 151.85       | 12.58       | 0.0535        |
| 5 N/O<br>(1 Im)          | 2.03(2)            | 9(1)         | -11(3)      | 254.22       | 21.07       | 0.0897        |
| 5 N/O<br>(2 Im)          | 2.04(2)            | 9(1)         | -10(2)      | 239.23       | 19.83       | 0.0844        |
| 5 N/O<br>(3 Im)          | 2.04(1)            | 9(1)         | -10(2)      | 213.44       | 17.69       | 0.0753        |
| <b>3 N/O<br/>(2 Im)</b>  | <b>2.00(1)</b>     | <b>2(1)</b>  | <b>1(2)</b> | <b>63.66</b> | <b>7.89</b> | <b>0.0224</b> |
| 1 O                      | 1.96(5)            | 4(2)         |             |              |             |               |
| 1 O                      | 2.17(5)            |              |             |              |             |               |
| 1 C                      | 2.68(5)            |              |             |              |             |               |
| 1 C                      | 2.78(5)            |              |             |              |             |               |
| 2 N/O<br>1 N/O<br>(2 Im) | 2.04(1)<br>2.16(2) | 4(1)<br>1(2) | 2(2)        | 114.44       | 11.37       | 0.0403        |
| 1 O                      | 1.94(2)            | 4(2)         |             |              |             |               |
| 1 O                      | 2.15(2)            |              |             |              |             |               |
| 1 C                      | 2.66(2)            |              |             |              |             |               |
| 1 C                      | 2.76(2)            |              |             |              |             |               |
| 2 N/O<br>(2 Im)          | 2.04(1)            | 1(1)         | 2(2)        | 169.6        | 16.85       | 0.0598        |
| 1 O                      | 1.88(2)            | 2(2)         |             |              |             |               |
| 1 O                      | 2.09(2)            |              |             |              |             |               |
| 1 C                      | 2.60(2)            |              |             |              |             |               |
| 1 C                      | 2.70(2)            |              |             |              |             |               |



**Table S4.** EXAFS analysis of Ni(JMJD2A) ( $k = 2 - 12.5 \text{ \AA}^{-1}$  fit in r-space with values  $r = 1 - 4.5$ ). Fits included in the text Table 1 are shown in **bold type**.

| Shell | $r(\text{\AA})$ | $\sigma^2(\text{\AA}^2)$ | $\Delta E_0(\text{eV})$ | $\chi^2$ | Red $\chi^2$ | R      |
|-------|-----------------|--------------------------|-------------------------|----------|--------------|--------|
| 2 N/O | 2.10(3)         | 0(2)                     | 0(5)                    | 1131.61  | 56.4         | 0.409  |
| 3 N/O | 2.09(2)         | 0(1)                     | -2(3)                   | 725.18   | 36.14        | 0.2621 |
| 4 N/O | 2.09(1)         | 1(1)                     | -3(2)                   | 542.76   | 27.05        | 0.1961 |
| 5 N/O | 2.09(1)         | 2(1)                     | -3(2)                   | 447.27   | 22.29        | 0.1616 |
| 6 N/O | 2.09(1)         | 4(1)                     | -3(2)                   | 415.89   | 20.72        | 0.1503 |
| 7 N/O | 2.09(1)         | 5(1)                     | -4(2)                   | 432.62   | 21.56        | 0.1563 |
| 2 S   | 2.17(2)         | 2(1)                     | -23(6)                  | 881.67   | 43.94        | 0.3187 |
| 3 S   | 2.18(2)         | 4(1)                     | -23(4)                  | 678.15   | 33.8         | 0.2451 |
| 4 S   | 2.18(2)         | 6(1)                     | -23(4)                  | 582.6    | 29.03        | 0.2105 |
| 5 S   | 2.18(2)         | 8(1)                     | -23(3)                  | 548.95   | 27.36        | 0.1984 |
| 6 S   | 2.19(2)         | 9(1)                     | -23(3)                  | 552.14   | 27.52        | 0.1995 |
| 7 S   | 2.19(2)         | 10(1)                    | -23(3)                  | 577.29   | 28.77        | 0.2086 |
| 2 N/O | 2(1)            | 0(26)                    |                         |          |              |        |
| 1 N/O | 2(2)            | 0(67)                    | -2(5)                   | 715.08   | 39.58        | 0.2584 |
| 2 N/O | 2.1(2)          | 1(24)                    |                         |          |              |        |
| 2 N/O | 2.1(2)          | 0(8)                     | -2(3)                   | 525.37   | 29.08        | 0.1899 |
| 3 N/O | 2.07(7)         | 0(7)                     |                         |          |              |        |
| 1 N/O | 2.2(2)          | 0(20)                    | -3(3)                   | 525.5    | 29.09        | 0.1899 |
| 4 N/O | 2.07(2)         | 1(3)                     |                         |          |              |        |
| 1 N/O | 2.17(9)         | 0(11)                    | -3(2)                   | 427.71   | 23.67        | 0.1546 |
| 3 N/O | 2.13(6)         | 2(10)                    |                         |          |              |        |
| 2 N/O | 2.05(9)         | 0(5)                     | -3(2)                   | 427.57   | 23.67        | 0.1545 |
| 5 N/O | 2.08(2)         | 2(2)                     |                         |          |              |        |
| 1 N/O | 2.20(6)         | 0(7)                     | -3(2)                   | 398.18   | 22.04        | 0.1439 |
| 4 N/O | 2.06(2)         | 2(2)                     |                         |          |              |        |

|       |         |        |        |        |       |        |
|-------|---------|--------|--------|--------|-------|--------|
| 2 N/O | 2.18(3) | 4(4)   | -3(2)  | 387.17 | 21.43 | 0.1399 |
| 3 N/O | 2.05(3) | 3(3)   |        |        |       |        |
| 3 N/O | 2.15(3) | 4(4)   | -3(2)  | 386.97 | 21.42 | 0.1398 |
| 6 N/O | 2.10(1) | 4(1)   |        |        |       |        |
| 1 N/O | 1.53(8) | 19(17) | -2(2)  | 375.64 | 20.79 | 0.1357 |
| 4 N/O | 2.06(3) | 3(3)   |        |        |       |        |
| 3 N/O | 2.17(4) | 7(7)   | -3(2)  | 422.2  | 23.37 | 0.1526 |
| 5 N/O | 2.09(1) | 3(1)   |        |        |       |        |
| 2 N/O | 2.2(1)  | 14(23) | -2(2)  | 421.66 | 23.34 | 0.1524 |
| 2 S   | 2.15(3) | 1(3)   |        |        |       |        |
| 1 S   | 2.27(5) | 0(4)   | -21(6) | 626.73 | 34.69 | 0.2265 |
| 2 S   | 2.14(2) | 0(2)   |        |        |       |        |
| 2 S   | 2.27(3) | 1(2)   | -20(4) | 531.57 | 29.42 | 0.1921 |
| 3 S   | 2.18(2) | 4(1)   |        |        |       |        |
| 1 S   | 1.58(8) | 16(10) | -23(5) | 630.24 | 34.89 | 0.2278 |
| 4 S   | 2.18(2) | 6(1)   |        |        |       |        |
| 1 S   | 3.88(7) | 2(6)   | -23(4) | 557.6  | 30.86 | 0.2015 |
| 3 S   | 2.16(2) | 3(2)   |        |        |       |        |
| 2 S   | 2.29(4) | 4(4)   | -19(4) | 514.58 | 28.48 | 0.186  |
| 5 S   | No fit  |        |        |        |       |        |
| 1 S   |         |        |        |        |       |        |
| 4 S   | 2.18(2) | 5(2)   |        |        |       |        |
| 2 S   | 2.33(6) | 8(8)   | -19(4) | 504.92 | 27.95 | 0.1825 |
| 3 S   | 2.17(2) | 4(2)   |        |        |       |        |
| 3 S   | 2.30(6) | 11(8)  | -18(4) | 500.79 | 27.72 | 0.181  |
| 6 S   | 2.19(2) | 9(1)   |        |        |       |        |
| 1 S   | 1.1(3)  | 14(27) | -22(3) | 542.32 | 30.02 | 0.196  |
| 4 S   | 2.19(2) | 6(2)   |        |        |       |        |
| 3 S   | 2.34(6) | 13(9)  | -17(4) | 485.69 | 26.88 | 0.1755 |
| 5 S   | 2.19(1) | 8(1)   |        |        |       |        |
| 2 S   | 2.93(3) | 6(3)   | -21(2) | 328.19 | 18.16 | 0.1186 |

---

|              |                    |                 |        |        |       |        |
|--------------|--------------------|-----------------|--------|--------|-------|--------|
| 2 N/O<br>1 S | 2.05(4)<br>2.26(5) | 0(2)<br>2(4)    |        |        |       |        |
|              |                    |                 | -8(6)  | 688.09 | 38.09 | 0.2487 |
| 1 N/O<br>2 S | 2.76(7)<br>2.18(2) | 0(7)<br>2(1)    |        |        |       |        |
|              |                    |                 | -21(6) | 822.71 | 45.54 | 0.2974 |
| 2 N/O<br>2 S | 2.03(3)<br>2.25(3) | 0(2)<br>4(2)    |        |        |       |        |
|              |                    |                 | -11(4) | 543.07 | 30.06 | 0.1963 |
| 3 N/O<br>1 S | 2.05(2)<br>2.28(3) | 0(1)<br>1(2)    |        |        |       |        |
|              |                    |                 | -8(3)  | 491.52 | 27.21 | 0.1776 |
| 1 N/O<br>3 S | 0.8(5)<br>2.18(2)  | 11(126)<br>4(1) |        |        |       |        |
|              |                    |                 | -23(5) | 674.2  | 37.32 | 0.2437 |
| 4 N/O<br>1 S | 2.06(2)<br>2.29(3) | 1(1)<br>3(3)    |        |        |       |        |
|              |                    |                 | -7(3)  | 451.44 | 24.99 | 0.1631 |
| 1 N/O<br>4 S | No fit             |                 |        |        |       |        |
| 2 N/O<br>3 S | 2.03(2)<br>2.24(3) | 0(2)<br>8(2)    |        |        |       |        |
|              |                    |                 | -13(4) | 511.66 | 28.32 | 0.1849 |
| 3 N/O<br>2 S | 2.05(2)<br>2.27(3) | 1(1)<br>7(3)    |        |        |       |        |
|              |                    |                 | -10(4) | 490.55 | 27.15 | 0.1773 |
| 5 N/O<br>1 S | 2.10(1)<br>2.63(3) | 2(1)<br>4(3)    |        |        |       |        |
|              |                    |                 | -2(2)  | 335.85 | 18.59 | 0.1214 |
| 1 N/O<br>5 S | No fit             |                 |        |        |       |        |
| 4 N/O<br>2 S | 2.07(2)<br>2.28(5) | 2(1)<br>11(5)   |        |        |       |        |
|              |                    |                 | -8(3)  | 467.61 | 25.88 | 0.169  |
| 2 N/O<br>4 S | 1.8(1)<br>2.18(2)  | 15(19)<br>6(1)  |        |        |       |        |
|              |                    |                 | -25(5) | 549.49 | 30.41 | 0.1986 |
| 3 N/O<br>3 S | 3.18(4)<br>2.17(2) | 1(3)<br>4(1)    |        |        |       |        |
|              |                    |                 | -25(4) | 540.09 | 29.89 | 0.1952 |
| 6 N/O<br>1 S | 2.10(1)<br>1.88(8) | 4(1)<br>23(19)  |        |        |       |        |
|              |                    |                 | -2(2)  | 396.38 | 21.94 | 0.1432 |

---

---

|                          |                    |                |        |        |       |        |
|--------------------------|--------------------|----------------|--------|--------|-------|--------|
| 1 N/O<br>6 S             | No fit             |                |        |        |       |        |
| 5 N/O<br>2 S             | 2.10(1)<br>2.63(3) | 3(1)<br>10(4)  | -1(1)  | 339.62 | 18.8  | 0.1227 |
| 2 N/O<br>5 S             | 2.75(4)<br>2.20(2) | 2(4)<br>8(1)   | -20(3) | 453.74 | 25.11 | 0.164  |
| 4 N/O<br>3 S             | 2.09(1)<br>2.54(8) | 1(1)<br>27(14) | -2(2)  | 427.28 | 23.65 | 0.1544 |
| 3 N/O<br>4 S             | 3.18(4)<br>2.17(2) | 2(3)<br>6(1)   | -24(3) | 451.23 | 24.98 | 0.1631 |
| 5 N/O<br>1 N/O<br>(1 Im) | 2.11(3)<br>2.02(6) | 4(3)<br>0(4)   | -1(2)  | 233.56 | 23.2  | 0.0844 |
| 6 N/O<br>(1 Im)          | 2.08(1)            | 3(1)           | 6(2)   | 207.61 | 17.21 | 0.075  |
| 4 N/O<br>1 N/O<br>(1 Im) | 2.11(2)<br>2.01(6) | 2(2)<br>0(5)   | -1(2)  | 238.72 | 23.72 | 0.0862 |
| 5 N/O<br>(1 Im)          | 2.08(1)            | 2(1)           | 6(2)   | 269.19 | 22.31 | 0.0973 |
| 6 N/O<br>1 N/O<br>(1 Im) | 2.09(2)<br>2.1(2)  | 4(1)<br>14(81) | -3(2)  | 254.01 | 25.24 | 0.0918 |
| 7 N/O<br>(1 Im)          | 2.08(1)            | 4(1)           | 6(2)   | 183.02 | 15.17 | 0.0661 |
| 3 N/O<br>3 N/O<br>(3 Im) | 2.15(3)<br>2.03(3) | 1(3)<br>1(2)   | 0(3)   | 253.9  | 25.23 | 0.0917 |
| 6 N/O<br>(3 Im)          | 2.08(1)            | 3(1)           | 5(1)   | 143.64 | 11.9  | 0.0519 |
| 2 N/O<br>3 N/O<br>(3 Im) | 2.16(3)<br>2.04(2) | 0(3)<br>0(2)   | 2(3)   | 166.79 | 16.57 | 0.0602 |

---

---

|                          |                    |                |             |             |             |               |
|--------------------------|--------------------|----------------|-------------|-------------|-------------|---------------|
| 5 N/O<br>(3 Im)          | 2.08(1)            | 2(1)           | 5(2)        | 194.27      | 16.1        | 0.0702        |
| 4 N/O<br>3 N/O<br>(3 Im) | 2.11(3)<br>2.05(2) | 5(3)<br>3(3)   | -1(2)       | 146.71      | 14.57       | 0.053         |
| 7 N/O<br>(3 Im)          | 2.08(1)            | 4(1)           | 5(1)        | 155.78      | 12.91       | 0.0563        |
| 4 N/O<br>2 N/O<br>(2 Im) | 2.13(2)<br>2.02(2) | 2(2)<br>0(2)   | -1(2)       | 90.89       | 9.03        | 0.0328        |
| <b>6 N/O<br/>(2 Im)</b>  | <b>2.08(1)</b>     | <b>4(1)</b>    | <b>5(1)</b> | <b>75.6</b> | <b>6.26</b> | <b>0.0273</b> |
| 3 N/O<br>2 N/O<br>(2 Im) | 2.14(2)<br>2.02(3) | 1(2)<br>0(2)   | 1(2)        | 183.8       | 18.26       | 0.0664        |
| 5 N/O<br>(2 Im)          | 2.08(1)            | 2(1)           | 5(2)        | 208.63      | 17.29       | 0.0754        |
| 5 N/O<br>2 N/O<br>(2 Im) | 2.11(4)<br>2.05(3) | 6(3)<br>2(3)   | -1(2)       | 158.3       | 15.73       | 0.0572        |
| 7 N/O<br>(2 Im)          | 2.08(1)            | 4(1)           | 5(1)        | 138.05      | 11.44       | 0.0499        |
| 4 N/O<br>(2 Im)          | 2.13(3)            | 4(2)           | -1(2)       | 162.52      | 16.15       | 0.0587        |
| 1 O                      | 1.99(3)            | 3(3)           |             |             |             |               |
| 1 O                      | 2.10(3)            |                |             |             |             |               |
| 1 C                      | 2.77(3)            |                |             |             |             |               |
| 1 C                      | 2.86(3)            |                |             |             |             |               |
| 3 N/O<br>1 N/O<br>(2 Im) | 2.1(9)<br>2.1(2)   | 1(16)<br>4(46) | -1(6)       | 135.01      | 16.74       | 0.0488        |
| 1 O                      | 1.98(5)            | 0(16)          |             |             |             |               |
| 1 O                      | 2.09(5)            |                |             |             |             |               |
| 1 C                      | 2.76(5)            |                |             |             |             |               |
| 1 C                      | 2.85(5)            |                |             |             |             |               |

---

---

|        |         |        |       |        |       |        |
|--------|---------|--------|-------|--------|-------|--------|
| 2 N/O  | 2.2(2)  | 13(46) | -1(6) | 166.29 | 20.62 | 0.0601 |
| 2 N/O  | 2.13(9) | 4(4)   |       |        |       |        |
| (2 Im) |         |        |       |        |       |        |
| 1 O    | 1.98(5) | 0(10)  |       |        |       |        |
| 1 O    | 2.09(5) |        |       |        |       |        |
| 1 C    | 2.76(5) |        |       |        |       |        |
| 1 C    | 2.85(5) |        |       |        |       |        |

---

**Table S5.** EXAFS analysis of Ni(JMJD2A)- $\alpha$ KG ( $k = 2 - 12.5 \text{ \AA}^{-1}$  fit in r-space with values  $r = 1 - 4.5$ ). Fits included in the text Table 1 are shown in **bold type**.

| Shell | $r(\text{\AA})$ | $\sigma^2(\text{\AA}^2)$ | $\Delta E_0(\text{eV})$ | $\chi^2$ | Red $\chi^2$ | R      |
|-------|-----------------|--------------------------|-------------------------|----------|--------------|--------|
| 2 N/O | 2.09(3)         | 0(2)                     | -1(7)                   | 1811.79  | 77.51        | 0.4251 |
| 3 N/O | 2.08(2)         | 0(1)                     | -3(4)                   | 676.96   | 28.96        | 0.29   |
| 4 N/O | 2.08(1)         | 2(1)                     | -3(3)                   | 497.34   | 21.27        | 0.213  |
| 5 N/O | 2.08(1)         | 3(1)                     | -4(2)                   | 388.48   | 16.62        | 0.1664 |
| 6 N/O | 2.08(1)         | 4(1)                     | -5(2)                   | 310.43   | 13.28        | 0.1329 |
| 7 N/O | 2.08(1)         | 4(1)                     | -5(2)                   | 330.62   | 14.14        | 0.1416 |
| 2 S   | 2.17(2)         | 2(1)                     | -23(6)                  | 630.04   | 26.95        | 0.2699 |
| 3 S   | 2.17(2)         | 4(1)                     | -23(4)                  | 429.06   | 18.35        | 0.1838 |
| 4 S   | 2.17(1)         | 6(1)                     | -24(3)                  | 334.04   | 14.28        | 0.1431 |
| 5 S   | 2.17(1)         | 7(1)                     | -24(3)                  | 298.01   | 12.74        | 0.1276 |
| 6 S   | 2.17(1)         | 8(1)                     | -25(3)                  | 296.12   | 12.67        | 0.1269 |
| 7 S   | 2.17(1)         | 10(1)                    | -25(3)                  | 315.6    | 13.5         | 0.1352 |
| 2 N/O | 2.1(6)          | 0(27)                    |                         |          |              |        |
| 1 N/O | 2(1)            | 0(43)                    | -3(6)                   | 668.49   | 31.27        | 0.2863 |
| 2 N/O | 2.16(7)         | 0(7)                     |                         |          |              |        |
| 2 N/O | 2.00(7)         | 0(6)                     | -4(4)                   | 471.44   | 22.05        | 0.2019 |
| 3 N/O | 2.07(7)         | 1(7)                     |                         |          |              |        |
| 1 N/O | 2.1(2)          | 0(13)                    | -3(4)                   | 484.08   | 22.64        | 0.2073 |
| 4 N/O | 2.07(3)         | 2(4)                     |                         |          |              |        |
| 1 N/O | 2.1(1)          | 0(8)                     | -4(3)                   | 371.48   | 17.38        | 0.1591 |
| 3 N/O | 2.01(3)         | 1(3)                     |                         |          |              |        |
| 2 N/O | 2.17(4)         | 0(4)                     | -4(3)                   | 353.28   | 16.52        | 0.1513 |
| 5 N/O | 2.03(2)         | 3(3)                     |                         |          |              |        |
| 1 N/O | 2.19(7)         | 0(6)                     | -5(2)                   | 311.35   | 14.56        | 0.1333 |
| 4 N/O | 2.02(2)         | 2(2)                     |                         |          |              |        |

|       |         |        |        |        |       |        |
|-------|---------|--------|--------|--------|-------|--------|
| 2 N/O | 2.17(3) | 0(3)   | -5(2)  | 294.27 | 13.76 | 0.126  |
| 3 N/O | 2.00(2) | 2(2)   |        |        |       |        |
| 3 N/O | 2.16(2) | 3(2)   | -5(2)  | 272.81 | 12.76 | 0.1168 |
| 6 N/O | 2.04(2) | 4(2)   |        |        |       |        |
| 1 N/O | 2.18(6) | 0(5)   | -5(2)  | 292.47 | 13.68 | 0.1252 |
| 4 N/O | 2.01(1) | 1(1)   |        |        |       |        |
| 3 N/O | 2.16(2) | 2(2)   | -5(2)  | 264.99 | 12.39 | 0.1135 |
| 5 N/O | 2.02(2) | 2(2)   |        |        |       |        |
| 2 N/O | 2.18(3) | 0(2)   | -6(2)  | 277.72 | 12.99 | 0.1189 |
| 2 S   | 2.21(2) | 2(2)   |        |        |       |        |
| 1 S   | 2.11(3) | 0(2)   | -23(5) | 353.46 | 16.53 | 0.1514 |
| 2 S   | 2.23(2) | 1(1)   |        |        |       |        |
| 2 S   | 2.11(1) | 1(1)   | -24(3) | 266.15 | 12.45 | 0.114  |
| 3 S   | 2.21(2) | 3(1)   |        |        |       |        |
| 1 S   | 2.09(2) | 0(1)   | -23(3) | 272.68 | 12.74 | 0.1168 |
| 4 S   | 2.20(2) | 5(1)   |        |        |       |        |
| 1 S   | 2.09(2) | 7(1)   | -24(3) | 271.05 | 12.68 | 0.1161 |
| 3 S   | 2.22(2) | 3(1)   |        |        |       |        |
| 2 S   | 2.11(2) | 2(1)   | -24(3) | 272.22 | 12.73 | 0.1166 |
| 5 S   | No fit  |        |        |        |       |        |
| 1 S   |         |        |        |        |       |        |
| 4 S   | 2.17(6) | 7(3)   |        |        |       |        |
| 2 S   | 2.2(2)  | 11(21) | -23(5) | 294.16 | 13.75 | 0.126  |
| 3 S   | 2.2(1)  | 7(5)   |        |        |       |        |
| 3 S   | 2.2(1)  | 9(16)  | -23(5) | 293.93 | 13.75 | 0.1259 |
| 6 S   | No fit  |        |        |        |       |        |
| 1 S   |         |        |        |        |       |        |
| 4 S   | 2.18(1) | 6(1)   |        |        |       |        |
| 3 S   | 2.3(2)  | 20(20) | -22(8) | 295.09 | 13.8  | 0.1264 |



|       |         |         |        |        |       |        |
|-------|---------|---------|--------|--------|-------|--------|
| 5 S   | 2.18(1) | 7(1)    |        |        |       |        |
| 2 S   | 2.94(3) | 7(3)    | -23(2) | 202.88 | 9.49  | 0.0869 |
| 2 N/O | 2.02(2) | 0(1)    |        |        |       |        |
| 1 S   | 2.25(2) | 2(1)    | -11(5) | 411.76 | 19.26 | 0.1763 |
| 1 N/O | 2.42(6) | 0(4)    |        |        |       |        |
| 2 S   | 2.16(2) | 2(1)    | -27(6) | 506.82 | 23.71 | 0.217  |
| 2 N/O | 1.99(2) | 0(1)    |        |        |       |        |
| 2 S   | 2.22(2) | 2(1)    | -16(3) | 271.16 | 12.68 | 0.1161 |
| 3 N/O | 2.02(1) | 0(1)    |        |        |       |        |
| 1 S   | 2.25(2) | 0(1)    | -11(3) | 272.09 | 12.73 | 0.1165 |
| 1 N/O | 1.14(6) | 3(5)    |        |        |       |        |
| 3 S   | 2.17(2) | 4(1)    | -23(4) | 422.97 | 19.78 | 0.1811 |
| 1 N/O | 1.14(6) | 3(5)    |        |        |       |        |
| 4 S   | 2.17(1) | 6(1)    | -24(3) | 329.08 | 15.39 | 0.1409 |
| 4 N/O | 2.03(1) | 1(1)    |        |        |       |        |
| 1 S   | 2.25(1) | 0(1)    | -11(3) | 245.93 | 11.5  | 0.1053 |
| 2 N/O | 1.99(2) | 1(1)    |        |        |       |        |
| 3 S   | 2.22(2) | 5(1)    | -17(3) | 266.72 | 12.52 | 0.1142 |
| 3 N/O | 2.01(2) | 1(1)    |        |        |       |        |
| 2 S   | 2.23(2) | 3(1)    | -15(3) | 259.71 | 12.13 | 0.1112 |
| 5 N/O | 2.04(2) | 3(1)    |        |        |       |        |
| 1 S   | 2.26(2) | 1(1)    | -11(3) | 250.37 | 11.75 | 0.1072 |
| 1 N/O | 0.07(7) | 228(97) |        |        |       |        |
| 5 S   | 2.17(1) | 7(1)    | -25(3) | 294.28 | 13.77 | 0.126  |
| 4 N/O | 2.02(2) | 3(1)    |        |        |       |        |
| 2 S   | 2.24(2) | 5(2)    | -13(3) | 267.42 | 12.52 | 0.1145 |
| 2 N/O | 2.77(5) | 5(6)    |        |        |       |        |
| 4 S   | 2.18(1) | 6(1)    | -22(3) | 308.29 | 14.45 | 0.132  |
| 3 N/O | 2.02(3) | 3(2)    |        |        |       |        |
| 3 S   | 2.22(2) | 6(2)    | -16(4) | 276.06 | 12.9  | 0.1182 |

|                                   |                            |                      |              |              |             |               |
|-----------------------------------|----------------------------|----------------------|--------------|--------------|-------------|---------------|
| 6 N/O<br>1 S                      | 2.05(2)<br>2.25(2)         | 5(1)<br>3(2)         | -10(2)       | 265.09       | 12.4        | 0.1135        |
| 1 N/O<br>6 S                      | No fit                     |                      |              |              |             |               |
| 5 N/O<br>2 S                      | 2.05(3)<br>2.23(2)         | 5(2)<br>6(3)         | -12(3)       | 274.2        | 12.83       | 0.1174        |
| 2 N/O<br>5 S                      | 1.3(2)<br>2.17(1)          | 25(34)<br>7(1)       | -24(3)       | 298.25       | 13.94       | 0.1277        |
| 4 N/O<br>3 S                      | 2.04(3)<br>2.22(3)         | 5(3)<br>8(3)         | -15(4)       | 280.73       | 13.14       | 0.1202        |
| 3 N/O<br>4 S                      | 2.76(5)<br>2.18(1)         | 8(7)<br>6(1)         | -21(3)       | 304.56       | 14.25       | 0.1304        |
| <b>4 N/O<br/>2 N/O<br/>(2 Im)</b> | <b>2.14(1)<br/>1.98(1)</b> | <b>1(1)<br/>1(1)</b> | <b>-2(2)</b> | <b>77.28</b> | <b>5.77</b> | <b>0.0331</b> |
| 6 N/O<br>(2 Im)                   | 2.08(1)                    | 3(1)                 | 5(2)         | 181.74       | 11.81       | 0.0778        |
| 3 N/O<br>2 N/O<br>(2 Im)          | 2.13(1)<br>2.00(2)         | 0(1)<br>0(1)         | -1(2)        | 135.05       | 10.09       | 0.0578        |
| 5 N/O<br>(2 Im)                   | 2.08(1)                    | 3(1)                 | 6(2)         | 252.53       | 16.42       | 0.1081        |
| 5 N/O<br>2 N/O<br>(2 Im)          | 2.13(1)<br>1.98(1)         | 2(1)<br>1(1)         | -2(1)        | 116.13       | 8.67        | 0.0497        |
| 7 N/O<br>(2 Im)                   | 2.07(1)                    | 4(1)                 | 5(2)         | 144.2        | 9.37        | 0.0617        |
| 5 N/O<br>1 N/O<br>(1 Im)          | 2.11(1)<br>2.00(4)         | 3(1)<br>0(3)         | -2(2)        | 147.57       | 11.02       | 0.0632        |
| 6 N/O<br>(1 Im)                   | 2.08(1)                    | 3(1)                 | 6(2)         | 183.5        | 11.93       | 0.0786        |

|                          |                    |              |             |              |             |               |
|--------------------------|--------------------|--------------|-------------|--------------|-------------|---------------|
| 4 N/O<br>1 N/O<br>(1 Im) | 2.12(2)<br>2.00(5) | 2(2)<br>0(3) | -1(2)       | 194.7        | 14.55       | 0.0834        |
| 5 N/O<br>(1 Im)          | 2.08(1)            | 3(1)         | 6(2)        | 253.1        | 16.45       | 0.1084        |
| 6 N/O<br>1 N/O<br>(1 Im) | 2.13(1)<br>1.97(3) | 4(1)<br>0(2) | -2(2)       | 145.92       | 10.9        | 0.0625        |
| 7 N/O<br>(1 Im)          | 2.08(1)            | 4(1)         | 5(2)        | 147.33       | 9.57        | 0.0631        |
| 3 N/O<br>3 N/O<br>(3 Im) | 2.15(1)<br>2.00(1) | 2(1)<br>2(1) | 0(1)        | 103.45       | 7.73        | 0.0443        |
| 6 N/O<br>(3 Im)          | 2.08(1)            | 3(1)         | 5(2)        | 181.95       | 11.83       | 0.0779        |
| 2 N/O<br>3 N/O<br>(3 Im) | 2.16(2)<br>2.01(1) | 0(2)<br>1(1) | 0(2)        | 154.89       | 11.57       | 0.0663        |
| 5 N/O<br>(3 Im)          | 2.07(1)            | 3(1)         | 5(3)        | 253.34       | 16.47       | 0.1085        |
| 4 N/O<br>3 N/O<br>(3 Im) | 2.14(1)<br>2.00(1) | 1(1)<br>1(1) | -1(1)       | 108.38       | 8.09        | 0.0464        |
| 7 N/O<br>(3 Im)          | 2.08(1)            | 4(1)         | 5(2)        | 144.36       | 9.38        | 0.0618        |
| <b>4 N/O<br/>(2 Im)</b>  | <b>2.08(2)</b>     | <b>3(2)</b>  | <b>5(3)</b> | <b>47.57</b> | <b>3.55</b> | <b>0.0305</b> |
| <b>1 O</b>               | <b>2.00(6)</b>     | <b>5(5)</b>  |             |              |             |               |
| <b>1 O</b>               | <b>2.05(6)</b>     |              |             |              |             |               |
| <b>1 C</b>               | <b>2.67(6)</b>     |              |             |              |             |               |
| <b>1 C</b>               | <b>2.69(6)</b>     |              |             |              |             |               |
| 3 N/O<br>1 N/O<br>(2 Im) | 2.08(5)<br>2.15(7) | 5(4)<br>0(4) | 3(1)        | 166.48       | 14.63       | 0.0713        |
| 1 O                      | 1.97(4)            | 3(3)         |             |              |             |               |

|        |         |      |      |        |       |        |  |
|--------|---------|------|------|--------|-------|--------|--|
| 1 O    | 2.02(4) |      |      |        |       |        |  |
| 1 C    | 2.64(4) |      |      |        |       |        |  |
| 1 C    | 2.66(4) |      |      |        |       |        |  |
| <hr/>  |         |      |      |        |       |        |  |
| 2 N/O  | 2.02(4) | 2(5) | 1(2) | 141.22 | 12.41 | 0.0605 |  |
| 2 N/O  | 2.15(2) | 0(2) |      |        |       |        |  |
| (2 Im) |         |      |      |        |       |        |  |
| 1 O    | 1.99(4) | 4(4) |      |        |       |        |  |
| 1 O    | 2.04(4) |      |      |        |       |        |  |
| 1 C    | 2.66(4) |      |      |        |       |        |  |
| 1 C    | 2.68(4) |      |      |        |       |        |  |
| 5 N/O  | 2.06(1) | 3(1) | 2(3) | 213.19 | 15.93 | 0.0912 |  |
| (2 Im) |         |      |      |        |       |        |  |
| 1 O    | 1.89(3) | 2(2) |      |        |       |        |  |
| 1 O    | 1.94(3) |      |      |        |       |        |  |
| 1 C    | 2.56(3) |      |      |        |       |        |  |
| 1 C    | 2.58(3) |      |      |        |       |        |  |
| 4 N/O  | 2.10(2) | 2(2) | 5(2) | 116.6  | 10.24 | 0.0499 |  |
| 1 N/O  | 2.50(3) | 0(3) |      |        |       |        |  |
| (2 Im) |         |      |      |        |       |        |  |
| 1 O    | 1.97(3) | 2(2) |      |        |       |        |  |
| 1 O    | 2.02(3) |      |      |        |       |        |  |
| 1 C    | 2.64(3) |      |      |        |       |        |  |
| 1 C    | 2.66(3) |      |      |        |       |        |  |
| 3 N/O  | 2.02(4) | 1(2) | 3(2) | 110.42 | 9.7   | 0.0473 |  |
| 2 N/O  | 2.15(2) | 4(4) |      |        |       |        |  |
| (2 Im) |         |      |      |        |       |        |  |
| 1 O    | 2.06(5) | 4(1) |      |        |       |        |  |
| 1 O    | 2.11(5) |      |      |        |       |        |  |
| 1 C    | 2.73(5) |      |      |        |       |        |  |
| 1 C    | 2.75(5) |      |      |        |       |        |  |
| 4 N/O  | 2.05(1) | 2(1) | 1(4) | 277.24 | 20.72 | 0.1187 |  |
| (3 Im) |         |      |      |        |       |        |  |
| 1 O    | 1.89(3) | 2(2) |      |        |       |        |  |
| 1 O    | 1.94(3) |      |      |        |       |        |  |
| 1 C    | 2.56(3) |      |      |        |       |        |  |
| 1 C    | 2.58(3) |      |      |        |       |        |  |
| 3 N/O  | 2.11(2) | 2(2) | 6(3) |        | 14.09 | 0.0687 |  |
| 1 N/O  | 2.50(4) | 0(4) |      |        |       |        |  |
| (3 Im) |         |      |      |        |       |        |  |
| 1 O    | 1.97(2) | 2(2) |      |        |       |        |  |

|        |         |      |      |        |       |        |
|--------|---------|------|------|--------|-------|--------|
| 1 O    | 2.02(2) |      |      |        |       |        |
| 1 C    | 2.64(2) |      |      |        |       |        |
| 1 C    | 2.66(2) |      |      |        |       |        |
| <hr/>  |         |      |      |        |       |        |
| 2 N/O  | 2.03(5) | 6(6) | 3(2) | 148.96 | 13.09 | 0.0638 |
| 2 N/O  | 2.16(2) | 0(2) |      |        |       |        |
| (3 Im) |         |      |      |        |       |        |
| 1 O    | 2.00(5) | 7(7) |      |        |       |        |
| 1 O    | 2.05(5) |      |      |        |       |        |
| 1 C    | 2.67(5) |      |      |        |       |        |
| 1 C    | 2.69(5) |      |      |        |       |        |
| 5 N/O  | 2.06(1) | 3(1) | 2(3) | 194.08 | 14.51 | 0.0831 |
| (3 Im) |         |      |      |        |       |        |
| 1 O    | 1.89(3) | 2(2) |      |        |       |        |
| 1 O    | 1.94(3) |      |      |        |       |        |
| 1 C    | 2.56(3) |      |      |        |       |        |
| 1 C    | 2.58(3) |      |      |        |       |        |
| 4 N/O  | 2.11(2) | 2(1) | 6(3) | 133.52 | 11.73 | 0.0572 |
| 1 N/O  | 2.50(3) | 0(3) |      |        |       |        |
| (3 Im) |         |      |      |        |       |        |
| 1 O    | 1.96(2) | 3(2) |      |        |       |        |
| 1 O    | 2.01(2) |      |      |        |       |        |
| 1 C    | 2.73(2) |      |      |        |       |        |
| 1 C    | 2.75(2) |      |      |        |       |        |
| 3 N/O  | 2.01(2) | 2(2) | 3(2) | 94.83  | 8.34  | 0.0406 |
| 2 N/O  | 2.15(2) | 0(2) |      |        |       |        |
| (3 Im) |         |      |      |        |       |        |
| 1 O    | 2.07(4) | 5(5) |      |        |       |        |
| 1 O    | 2.12(4) |      |      |        |       |        |
| 1 C    | 2.74(4) |      |      |        |       |        |
| 1 C    | 2.76(4) |      |      |        |       |        |
| <hr/>  |         |      |      |        |       |        |

**Table S6.** EXAFS analysis of Ni(JMJD2A)- $\alpha$ KG + substrate ( $k = 2 - 12.5 \text{ \AA}^{-1}$  fit in r-space with values  $r = 1 - 4.5$ ). Fits included in the text Table 1 are shown in **bold type**.

| Shell | $r(\text{\AA})$ | $\sigma^2(\text{\AA}^2)$ | $\Delta E_0(\text{eV})$ | $\chi^2$ | Red $\chi^2$ | R      |
|-------|-----------------|--------------------------|-------------------------|----------|--------------|--------|
| 2 N/O | 2.09(2)         | 0(1)                     | -1(5)                   | 436.96   | 18.69        | 0.4014 |
| 3 N/O | 2.09(1)         | 1(1)                     | -2(3)                   | 294.55   | 12.6         | 0.2706 |
| 4 N/O | 2.09(1)         | 2(1)                     | -3(2)                   | 208.52   | 8.92         | 0.1915 |
| 5 N/O | 2.09(1)         | 3(1)                     | -3(2)                   | 160.06   | 6.84         | 0.147  |
| 6 N/O | 2.09(1)         | 4(1)                     | -4(1)                   | 140.02   | 5.99         | 0.1286 |
| 7 N/O | 2.09(1)         | 5(1)                     | -4(1)                   | 141.65   | 6.06         | 0.1301 |
| 2 S   | 2.18(2)         | 3(1)                     | -22(5)                  | 311.01   | 13.3         | 0.2857 |
| 3 S   | 2.18(1)         | 4(1)                     | -23(4)                  | 212.93   | 9.11         | 0.1956 |
| 4 S   | 2.18(1)         | 6(1)                     | -23(3)                  | 166.77   | 7.13         | 0.1532 |
| 5 S   | 2.18(1)         | 7(1)                     | -23(2)                  | 150.53   | 6.44         | 0.1384 |
| 6 S   | 2.18(1)         | 9(1)                     | -23(2)                  | 152.62   | 6.53         | 0.1402 |
| 7 S   | 2.18(1)         | 10(1)                    | -24(2)                  | 165.46   | 7.07         | 0.1519 |
| 2 N/O | 2.1(3)          | 0(18)                    |                         |          |              |        |
| 1 N/O | 2.1(6)          | 0(24)                    | -2(4)                   | 288.91   | 13.51        | 0.2654 |
| 2 N/O | 2.17(5)         | 0(5)                     |                         |          |              |        |
| 2 N/O | 2.04(5)         | 0(5)                     | -3(3)                   | 193.77   | 9.06         | 0.178  |
| 3 N/O | 2.07(4)         | 1(4)                     |                         |          |              |        |
| 1 N/O | 2.1(1)          | 0(9)                     | -3(3)                   | 200.67   | 9.38         | 0.1843 |
| 4 N/O | 2.04(3)         | 2(3)                     |                         |          |              |        |
| 1 N/O | 2.18(8)         | 0(6)                     | -3(2)                   | 151.68   | 7.09         | 0.1393 |
| 3 N/O | 2.16(2)         | 3(3)                     |                         |          |              |        |
| 2 N/O | 2.00(3)         | 0(3)                     | -3(2)                   | 142.08   | 6.64         | 0.1305 |
| 5 N/O | 2.04(2)         | 3(2)                     |                         |          |              |        |
| 1 N/O | 2.19(5)         | 0(4)                     | -4(2)                   | 131.5    | 6.15         | 0.1208 |

|       |          |        |        |        |      |        |
|-------|----------|--------|--------|--------|------|--------|
| 4 N/O | 2.02(2)  | 2(2)   |        |        |      |        |
| 2 N/O | 2.18(2)  | 2(2)   | -4(2)  | 125.51 | 5.87 | 0.1153 |
| 3 N/O | 2.01(1)  | 2(2)   |        |        |      |        |
| 3 N/O | 2.16(1)  | 3(2)   | -4(1)  | 103.51 | 4.84 | 0.0951 |
| 6 N/O | 2.09(1)  | 4(1)   |        |        |      |        |
| 1 N/O | 2.87(3)  | 0(3)   | -4(1)  | 119.02 | 5.56 | 0.1093 |
| 4 N/O | 2.02(1)  | 1(1)   |        |        |      |        |
| 3 N/O | 2.16(1)  | 2(1)   | -5(1)  | 131.88 | 6.17 | 0.1211 |
| 5 N/O | 2.03(1)  | 2(2)   |        |        |      |        |
| 2 N/O | 2.18(2)  | 2(2)   | -5(2)  | 133.17 | 6.23 | 0.1233 |
| 2 S   | 2.22(2)  | 2(2)   |        |        |      |        |
| 1 S   | 2.11(2)  | 0(2)   | -22(4) | 180.88 | 8.46 | 0.1661 |
| 2 S   | 2.12(2)  | 1(1)   |        |        |      |        |
| 2 S   | 2.24(2)  | 1(1)   | -23(3) | 150.72 | 7.05 | 0.1384 |
| 3 S   | 2.21(2)  | 3(1)   |        |        |      |        |
| 1 S   | 2.10(2)  | 0(1)   | -22(3) | 149.08 | 6.97 | 0.1369 |
| 4 S   | No fit   |        |        |        |      |        |
| 1 S   |          |        |        |        |      |        |
| 3 S   | 2.14(2)  | 4(2)   |        |        |      |        |
| 2 S   | 2.25(30) | 4(3)   | -22(3) | 147.01 | 6.88 | 0.135  |
| 5 S   | No fit   |        |        |        |      |        |
| 1 S   |          |        |        |        |      |        |
| 4 S   | 2.18(2)  | 6(2)   |        |        |      |        |
| 2 S   | 2.30(8)  | 13(13) | -20(4) | 142.44 | 6.66 | 0.1308 |
| 3 S   | 2.17(2)  | 5(1)   |        |        |      |        |
| 3 S   | 2.26(7)  | 12(8)  | -20(4) | 143.31 | 6.7  | 0.1316 |
| 6 S   | No fit   |        |        |        |      |        |
| 1 S   |          |        |        |        |      |        |
| 4 S   | 2.18(1)  | 6(1)   |        |        |      |        |
| 3 S   | 2.32(6)  | 16(10) | -19(3) | 137.43 | 6.43 | 0.1262 |

| 5 S<br>2 S   | No fit             |                |        |        |       |        |
|--------------|--------------------|----------------|--------|--------|-------|--------|
| 2 N/O<br>1 S | 2.04(2)<br>2.25(2) | 0(1)<br>1(2)   | -10(4) | 206.25 | 9.64  | 0.1895 |
| 1 N/O<br>2 S | 2.43(6)<br>2.16(2) | 0(4)<br>2(1)   | -25(6) | 266.68 | 12.46 | 0.245  |
| 2 N/O<br>2 S | 2.01(2)<br>2.23(2) | 0(1)<br>3(1)   | -15(3) | 150.52 | 7.04  | 0.1383 |
| 3 N/O<br>1 S | 2.03(1)<br>2.25(1) | 0(1)<br>0(1)   | -11(3) | 146.44 | 6.83  | 0.1343 |
| 1 N/O<br>3 S | 0.78(4)<br>2.18(1) | 2(5)<br>4(1)   | -23(3) | 207.49 | 9.7   | 0.1907 |
| 1 N/O<br>4 S | 2.6(2)<br>2.18(1)  | 10(26)<br>6(1) | -22(3) | 157.05 | 7.34  | 0.1443 |
| 4 N/O<br>1 S | 2.04(1)<br>2.26(2) | 2(1)<br>1(1)   | -10(2) | 132.02 | 6.17  | 0.1213 |
| 2 N/O<br>3 S | 2.01(2)<br>2.22(2) | 2(2)<br>6(1)   | -16(3) | 145.08 | 6.78  | 0.1333 |
| 3 N/O<br>2 S | 2.03(2)<br>2.24(2) | 2(1)<br>4(1)   | -13(3) | 141.71 | 6.62  | 0.1302 |
| 5 N/O<br>1 S | 2.06(2)<br>2.26(2) | 4(1)<br>3(2)   | -9(2)  | 129.3  | 6.04  | 0.1188 |
| 1 N/O<br>5 S | 0.78(4)<br>2.18(1) | 3(5)<br>7(1)   | -23(2) | 147.26 | 6.88  | 0.1353 |
| 4 N/O<br>2 S | 2.05(2)<br>2.24(2) | 4(1)<br>6(2)   | -11(3) | 138.23 | 6.46  | 0.127  |
| 2 N/O<br>4 S | 0.8(1)<br>2.18(1)  | 6(7)<br>6(1)   | -24(3) | 163.91 | 7.66  | 0.1506 |
| 3 N/O<br>3 S | 2.04(2)<br>2.22(2) | 3(2)<br>7(2)   | -14(3) | 143.45 | 6.7   | 0.1318 |



|                                   |                            |                      |              |              |             |               |
|-----------------------------------|----------------------------|----------------------|--------------|--------------|-------------|---------------|
| 6 N/O<br>1 S                      | 2.08(2)<br>2.23(3)         | 5(1)<br>6(4)         | -7(2)        | 130.97       | 6.12        | 0.1203        |
| 1 N/O<br>6 S                      | No fit                     |                      |              |              |             |               |
| 2 N/O<br>5 S                      | 1(1)<br>2.18(1)            | 95(200)<br>7(1)      | -23(3)       | 149.22       | 6.97        | 0.1371        |
| 5 N/O<br>2 S                      | 2.07(2)<br>2.24(3)         | 5(2)<br>8(4)         | -10(3)       | 136.33       | 6.37        | 0.1253        |
| 4 N/O<br>3 S                      | 2.06(2)<br>2.23(3)         | 4(2)<br>9(3)         | -12(3)       | 141.82       | 6.63        | 0.1303        |
| 3 N/O<br>4 S                      | 2.68(8)<br>2.19(1)         | 12(12)<br>6(1)       | -21(3)       | 131.26       | 6.13        | 0.1206        |
| <b>4 N/O<br/>2 N/O<br/>(2 Im)</b> | <b>2.14(1)<br/>1.99(1)</b> | <b>1(1)<br/>1(1)</b> | <b>-1(1)</b> | <b>36.82</b> | <b>2.74</b> | <b>0.0338</b> |
| 6 N/O<br>(2 Im)                   | 2.08(1)                    | 4(1)                 | 5(1)         | 70.18        | 4.55        | 0.0644        |
| 3 N/O<br>2 N/O<br><br>(2 Im)      | 2.15(2)<br>2.00(2)         | 3(2)<br>2(2)         | 0(1)         | 37.45        | 2.79        | 0.036         |
| 5 N/O<br>(2 Im)                   | 2.08(1)                    | 3(1)                 | 5(2)         | 103.28       | 6.71        | 0.0948        |
| 5 N/O<br>2 N/O<br>(2 Im)          | 2.14(2)<br>2.00(4)         | 5(2)<br>3(3)         | -2(1)        | 60.19        | 4.49        | 0.0553        |
| 7 N/O<br>(2 Im)                   | 2.08(1)                    | 5(1)                 | 4(1)         | 51.16        | 3.32        | 0.047         |
| 5 N/O<br>1 N/O<br>(1 Im)          | 2.11(1)<br>2.00(3)         | 3(1)<br>0(2)         | -2(1)        | 53.6         | 4           | 0.0492        |

|                                                                   |                                                                      |                            |             |              |             |               |
|-------------------------------------------------------------------|----------------------------------------------------------------------|----------------------------|-------------|--------------|-------------|---------------|
| 6 N/O<br>(1 Im)                                                   | 2.08(1)                                                              | 4(1)                       | 6(1)        | 65.31        | 4.24        | 0.06          |
| 4 N/O<br>1 N/O<br>(1 Im)                                          | 2.11(1)<br>2.00(3)                                                   | 2(1)<br>0(3)               | -2(2)       | 63.77        | 4.76        | 0.0586        |
| 5 N/O<br>(1 Im)                                                   | 2.08(1)                                                              | 3(1)                       | 6(2)        | 96.58        | 6.28        | 0.0887        |
| 6 N/O<br>1 N/O<br>(1 Im)                                          | 2.13(1)<br>1.97(3)                                                   | 4(1)<br>0(2)               | -3(1)       | 68.62        | 5.12        | 0.063         |
| 7 N/O<br>(1 Im)                                                   | 2.08(1)                                                              | 5(1)                       | 5(1)        | 47.67        | 3.09        | 0.0438        |
| 3 N/O<br>3 N/O<br><br>(3 Im)                                      | 2.15(1)<br>2.01(1)                                                   | 2(1)<br>1(1)               | 0(1)        | 38.99        | 2.91        | 0.0358        |
| 6 N/O<br>(3 Im)                                                   | 2.08(1)                                                              | 4(1)                       | 4(1)        | 69.98        | 4.55        | 0.0643        |
| 2 N/O<br>3 N/O<br>(3 Im)                                          | 2.16(1)<br>2.02(1)                                                   | 1(1)<br>1(1)               | 1(1)        | 52.82        | 3.94        | 0.0485        |
| 5 N/O<br>(3 Im)                                                   | 2.08(1)                                                              | 3(1)                       | 6(2)        | 104.05       | 6.761       | 0.0956        |
| 4 N/O<br>3 N/O<br>(3 Im)                                          | 2.15(2)<br>2.00(3)                                                   | 4(2)<br>4(2)               | -1(1)       | 54.2         | 4.05        | 0.0498        |
| 7 N/O<br>(3 Im)                                                   | 2.08(1)                                                              | 4(1)                       | 4(1)        | 54.59        | 3.54        | 0.0501        |
| <b>4 N/O<br/>(2 Im)</b><br><b>1 O</b><br><b>1 O</b><br><b>1 C</b> | <b>2.09(2)</b><br><b>1.98(4)</b><br><b>2.03(4)</b><br><b>2.65(4)</b> | <b>3(1)</b><br><b>4(3)</b> | <b>4(2)</b> | <b>18.18</b> | <b>1.59</b> | <b>0.0303</b> |

|            |                |      |      |       |      |        |  |
|------------|----------------|------|------|-------|------|--------|--|
| <b>1 C</b> | <b>2.67(4)</b> |      |      |       |      |        |  |
| 2 N/O      | 2.02(2)        | 0(3) | 2(1) | 71.75 | 5.36 | 0.0659 |  |
| 2 N/O      | 2.14(2)        | 3(3) |      |       |      |        |  |
| (2 Im)     |                |      |      |       |      |        |  |
| 1 O        | 2.01(5)        | 7(7) |      |       |      |        |  |
| 1 O        | 2.06(5)        |      |      |       |      |        |  |
| 1 C        | 2.68(5)        |      |      |       |      |        |  |
| 1 C        | 2.70(5)        |      |      |       |      |        |  |
| <hr/>      |                |      |      |       |      |        |  |
| 3 N/O      | 2.05(3)        | 5(4) | 3(1) | 53.55 | 4.7  | 0.0492 |  |
| 1 N/O      | 2.16(4)        | 0(4) |      |       |      |        |  |
| (2 Im)     |                |      |      |       |      |        |  |
| 1 O        | 2.01(5)        | 6(5) |      |       |      |        |  |
| 1 O        | 2.06(5)        |      |      |       |      |        |  |
| 1 C        | 2.68(5)        |      |      |       |      |        |  |
| 1 C        | 2.70(5)        |      |      |       |      |        |  |
| 3 N/O      | 2.10(1)        | 1(1) | 5(2) | 88.79 | 6.63 | 0.0815 |  |
| (2 Im)     |                |      |      |       |      |        |  |
| 1 O        | 1.97(2)        | 2(2) |      |       |      |        |  |
| 1 O        | 2.02(2)        |      |      |       |      |        |  |
| 1 C        | 2.64(2)        |      |      |       |      |        |  |
| 1 C        | 2.66(2)        |      |      |       |      |        |  |
| 2 N/O      | 2.07(6)        | 6(6) | 4(2) | 74.69 | 6.56 | 0.0686 |  |
| 1 N/O      | 2.16(5)        | 0(4) |      |       |      |        |  |
| (2 Im)     |                |      |      |       |      |        |  |
| 1 O        | 1.99(4)        | 3(3) |      |       |      |        |  |
| 1 O        | 2.04(4)        |      |      |       |      |        |  |
| 1 C        | 2.66(4)        |      |      |       |      |        |  |
| 1 C        | 2.68(4)        |      |      |       |      |        |  |
| 5 N/O      | 2.08(1)        | 3(1) | 4(2) | 65.42 | 4.89 | 0.0601 |  |
| (2 Im)     |                |      |      |       |      |        |  |
| 1 O        | 1.97(7)        | 9(6) |      |       |      |        |  |
| 1 O        | 2.02(7)        |      |      |       |      |        |  |
| 1 C        | 2.64(7)        |      |      |       |      |        |  |
| 1 C        | 2.66(7)        |      |      |       |      |        |  |
| 5 N/O      | 2.08(1)        | 4(1) | 6(2) | 62.88 | 4.7  | 0.0577 |  |
| (1 Im)     |                |      |      |       |      |        |  |
| 1 O        | 2.03(7)        | 8(6) |      |       |      |        |  |
| 1 O        | 2.08(7)        |      |      |       |      |        |  |
| 1 C        | 2.70(7)        |      |      |       |      |        |  |
| 1 C        | 2.72(7)        |      |      |       |      |        |  |

|                 |         |      |      |       |      |        |
|-----------------|---------|------|------|-------|------|--------|
| 3 N/O<br>(3 Im) | 2.10(1) | 1(1) | 4(2) | 96.54 | 7.21 | 0.0887 |
| 1 O             | 1.96(2) | 2(2) |      |       |      |        |
| 1 O             | 2.01(2) |      |      |       |      |        |
| 1 C             | 2.63(2) |      |      |       |      |        |
| 1 C             | 2.65(2) |      |      |       |      |        |
| 2 N/O           | 2.08(6) | 4(4) | 3(2) | 75.9  | 6.67 | 0.0697 |
| 1 N/O<br>(3 Im) | 2.15(7) | 0(4) |      |       |      |        |
| 1 O             | 1.97(7) | 2(2) |      |       |      |        |
| 1 O             | 2.02(7) |      |      |       |      |        |
| 1 C             | 2.64(7) |      |      |       |      |        |
| 1 C             | 2.66(7) |      |      |       |      |        |

**Table S7.** EXAFS analysis of Fe(JMJD2C) ( $k = 2 - 12.5 \text{ \AA}^{-1}$  fit in r-space with values  $r = 1 - 4.5$ ). Fits included in the text Table 1 are shown in **bold type**.

| Shell | $r(\text{\AA})$ | $\sigma^2(\text{\AA}^2)$ | $\Delta E_0(\text{eV})$ | $\chi^2$ | Red $\chi^2$ | R      |
|-------|-----------------|--------------------------|-------------------------|----------|--------------|--------|
| 2 N/O | 2.05(2)         | 1(1)                     | -9(5)                   | 168.55   | 8.4          | 0.3389 |
| 3 N/O | 2.05(2)         | 3(1)                     | -10(3)                  | 113.36   | 5.65         | 0.2279 |
| 4 N/O | 2.05(1)         | 5(1)                     | -10(2)                  | 84.78    | 4.22         | 0.1705 |
| 5 N/O | 2.05(1)         | 7(1)                     | -11(2)                  | 73.56    | 3.66         | 0.1479 |
| 6 N/O | 2.05(1)         | 8(1)                     | -12(2)                  | 73.73    | 3.67         | 0.1482 |
| 7 N/O | 2.04(1)         | 10(1)                    | -13(2)                  | 81.2     | 4.04         | 0.1632 |
| 2 S   | 2.14(2)         | 5(1)                     | -30(6)                  | 145.72   | 7.26         | 0.293  |
| 3 S   | 2.14(2)         | 8(1)                     | -30(4)                  | 106.61   | 5.31         | 0.2144 |
| 4 S   | 2.15(2)         | 10(1)                    | -30(4)                  | 88.14    | 4.39         | 0.1772 |
| 5 S   | 2.15(2)         | 12(1)                    | -30(3)                  | 80.82    | 4.02         | 0.1625 |
| 6 S   | 2.15(2)         | 13(1)                    | -30(3)                  | 79.84    | 3.97         | 0.1605 |
| 7 S   | 2.15(2)         | 15(1)                    | -30(3)                  | 82.56    | 4.11         | 0.166  |
| 2 N/O | 2.00(3)         | 1(4)                     |                         |          |              |        |
| 1 N/O | 2.15(6)         | 0(7)                     | -9(4)                   | 102.62   | 5.68         | 0.2063 |
| 2 N/O | 2.00(2)         | 0(2)                     |                         |          |              |        |
| 2 N/O | 2.13(2)         | 1(3)                     | -9(2)                   | 68.17    | 3.77         | 0.137  |
| 3 N/O | 2.01(2)         | 2(2)                     |                         |          |              |        |
| 1 N/O | 2.15(4)         | 0(4)                     | -10(3)                  | 74.4     | 4.11         | 0.1496 |
| 4 N/O | 2.01(2)         | 4(2)                     |                         |          |              |        |
| 1 N/O | 2.16(3)         | 0(3)                     | -10(2)                  | 64.88    | 3.59         | 0.1304 |
| 3 N/O | 1.99(1)         | 1(1)                     |                         |          |              |        |
| 2 N/O | 2.14(2)         | 2(2)                     | -10(2)                  | 61.87    | 3.42         | 0.1244 |
| 5 N/O | 2.03(2)         | 5(1)                     |                         |          |              |        |
| 1 N/O | 2.17(3)         | 0(3)                     | -11(2)                  | 69.93    | 3.87         | 0.1406 |

|       |         |        |        |       |      |        |
|-------|---------|--------|--------|-------|------|--------|
| 4 N/O | 2.00(2) | 4(2)   |        |       |      |        |
| 2 N/O | 2.15(3) | 3(3)   | -11(2) | 70.09 | 3.88 | 0.1409 |
| 3 N/O | 1.98(2) | 3(2)   |        |       |      |        |
| 3 N/O | 2.13(3) | 4(3)   | -11(2) | 70.78 | 3.91 | 0.1423 |
| 6 N/O | 2.05(1) | 8(1)   |        |       |      |        |
| 1 N/O | 2.89(3) | 0(3)   | -12(2) | 51.24 | 2.83 | 0.103  |
| 4 N/O | 2.04(2) | 6(2)   |        |       |      |        |
| 3 N/O | 2.1(2)  | 24(15) | -11(5) | 80.28 | 4.44 | 0.1614 |
| 5 N/O | 2.06(2) | 7(1)   |        |       |      |        |
| 2 N/O | 1.56(7) | 36(20) | -8(3)  | 67.4  | 3.73 | 0.1355 |
| 2 S   | 2.11(2) | 3(1)   |        |       |      |        |
| 1 S   | 2.25(3) | 0(2)   | -28(4) | 86.11 | 4.76 | 0.1731 |
| 2 S   | 2.10(2) | 4(2)   |        |       |      |        |
| 2 S   | 2.24(3) | 5(2)   | -27(4) | 74.49 | 4.12 | 0.1498 |
| 3 S   | No fit  |        |        |       |      |        |
| 1 S   |         |        |        |       |      |        |
| 4 S   | 2.15(2) | 10(1)  |        |       |      |        |
| 1 S   | 1.80(9) | 34(10) | -28(3) | 63.76 | 3.52 | 0.1282 |
| 3 S   | 2.10(2) | 8(1)   |        |       |      |        |
| 2 S   | 2.60(6) | 11(5)  | -38(5) | 99.18 | 5.49 | 0.1994 |
| 5 S   | No fit  |        |        |       |      |        |
| 1 S   |         |        |        |       |      |        |
| 4 S   | No fit  |        |        |       |      |        |
| 2 S   |         |        |        |       |      |        |
| 3 S   | 2.12(2) | 8(2)   |        |       |      |        |
| 3 S   | 2.26(5) | 11(5)  | -26(4) | 72.02 | 3.98 | 0.1448 |
| 6 S   | No fit  |        |        |       |      |        |
| 1 S   |         |        |        |       |      |        |
| 4 S   | 2.14(2) | 10(1)  |        |       |      |        |
| 3 S   | 1.4(3)  | 64(97) | -30(5) | 87.24 | 4.82 | 0.1754 |

|       |         |       |        |       |      |        |
|-------|---------|-------|--------|-------|------|--------|
| 5 S   | 2.16(1) | 12(1) |        |       |      |        |
| 2 S   | 2.96(3) | 8(3)  | -27(3) | 58.33 | 3.22 | 0.1173 |
| 2 N/O | 1.99(2) | 0(1)  |        |       |      |        |
| 1 S   | 2.24(2) | 3(2)  | -17(3) | 79.25 | 4.38 | 0.1593 |
| 1 N/O | 1.94(3) | 0(2)  |        |       |      |        |
| 2 S   | 2.19(3) | 6(2)  | -24(5) | 86.48 | 4.78 | 0.1739 |
| 2 N/O | 1.98(2) | 2(1)  |        |       |      |        |
| 2 S   | 2.23(3) | 8(2)  | -19(3) | 70.81 | 3.92 | 0.1424 |
| 3 N/O | 2.00(2) | 3(1)  |        |       |      |        |
| 1 S   | 2.26(3) | 5(2)  | -15(3) | 68.3  | 3.78 | 0.1373 |
| 1 N/O | No fit  |       |        |       |      |        |
| 3 S   |         |       |        |       |      |        |
| 1 N/O | No fit  |       |        |       |      |        |
| 4 S   |         |       |        |       |      |        |
| 4 N/O | 2.01(2) | 5(1)  |        |       |      |        |
| 1 S   | 2.27(4) | 8(4)  | -15(3) | 66.88 | 3.7  | 0.1345 |
| 2 N/O | No fit  |       |        |       |      |        |
| 3 S   |         |       |        |       |      |        |
| 3 N/O | 2.00(2) | 4(1)  |        |       |      |        |
| 2 S   | 2.25(4) | 11(3) | -17(3) | 68.02 | 3.76 | 0.1367 |
| 5 N/O | 2.06(2) | 9(2)  |        |       |      |        |
| 1 S   | 1.84(2) | 12(5) | -6(2)  | 61.71 | 3.41 | 0.1241 |
| 1 N/O | No fit  |       |        |       |      |        |
| 5 S   |         |       |        |       |      |        |
| 4 N/O | 2.02(2) | 6(2)  |        |       |      |        |
| 2 S   | 2.25(5) | 16(6) | -16(3) | 68.83 | 3.81 | 0.1384 |
| 2 N/O | No fit  |       |        |       |      |        |
| 4 S   |         |       |        |       |      |        |
| 3 N/O | 2.01(2) | 5(2)  |        |       |      |        |
| 3 S   | 2.23(4) | 16(4) | -18(4) | 68.99 | 3.81 | 0.1387 |
| 6 N/O | 2.05(2) | 11(3) |        |       |      |        |
| 1 S   | 1.85(3) | 11(5) | -7(2)  | 63.72 | 3.52 | 0.1281 |

|                         |                |             |               |              |             |               |
|-------------------------|----------------|-------------|---------------|--------------|-------------|---------------|
| 1 N/O                   | 18(1)          | 0(124)      |               |              |             |               |
| 6 S                     | 2.15(2)        | 13(1)       | -30(3)        | 77.19        | 4.27        | 0.1552        |
| 5 N/O                   | 2.03(2)        | 7(2)        |               |              |             |               |
| 2 S                     | 2.22(7)        | 22(13)      | -15(3)        | 70.66        | 3.91        | 0.1421        |
| 2 N/O                   | 0.86(4)        | 5(4)        |               |              |             |               |
| 5 S                     | 2.15(2)        | 12(1)       | -30(3)        | 76.53        | 4.23        | 0.1539        |
| 4 N/O                   | 2.02(2)        | 6(2)        |               |              |             |               |
| 3 S                     | 2.23(5)        | 21(7)       | -17(4)        | 69.9         | 3.86        | 0.1405        |
| 3 N/O                   | 5.4(2)         | 0(29)       |               |              |             |               |
| 4 S                     | 2.15(2)        | 10(1)       | -30(4)        | 87.27        | 4.83        | 0.1755        |
| 4 N/O                   | 2.01(1)        | 3(1)        |               |              |             |               |
| 2 N/O<br>(2 Im)         | 2.15(2)        | 2(2)        | -12(2)        | 18.61        | 1.85        | 0.0374        |
| 6 N/O<br>(2 Im)         | 2.04(1)        | 8(1)        | -13(2)        | 24.85        | 2.06        | 0.0499        |
| <b>3 N/O</b>            | <b>1.99(1)</b> | <b>1(1)</b> |               |              |             |               |
| <b>2 N/O<br/>(2 Im)</b> | <b>2.15(1)</b> | <b>2(1)</b> | <b>-11(1)</b> | <b>13.84</b> | <b>1.37</b> | <b>0.0278</b> |
| 5 N/O<br>(2 Im)         | 2.04(1)        | 7(1)        | -12(2)        | 26.26        | 2.17        | 0.0528        |
| 5 N/O                   | 2.02(2)        | 6(2)        |               |              |             |               |
| 2 N/O<br>(2 Im)         | 2.17(4)        | 5(5)        | -12(2)        | 27.13        | 2.69        | 0.0545        |
| 7 N/O<br>(2 Im)         | 2.04(1)        | 10(1)       | -13(2)        | 30.27        | 2.5         | 0.0608        |
| 4 N/O                   | 2.03(2)        | 3(1)        |               |              |             |               |
| 1 N/O<br>(1 Im)         | 2.18(3)        | 0(3)        | -9(2)         | 25.47        | 2.53        | 0.0512        |
| 6 N/O<br>(1 Im)         | 2.04(1)        | 8(1)        | -13(2)        | 32.51        | 2.69        | 0.0653        |
| 5 N/O                   | 2.03(1)        | 5(1)        |               |              |             |               |
| 1 N/O                   | 2.17(3)        | 0(2)        | -12(2)        | 24.68        | 2.45        | 0.0496        |



| (1 Im)                   |                    |              |        |       |      |        |
|--------------------------|--------------------|--------------|--------|-------|------|--------|
| 5 N/O<br>(1 Im)          | 2.05(1)            | 7(1)         | -11(2) | 38.71 | 3.2  | 0.0778 |
| 6 N/O<br>1 N/O<br>(1 Im) | 2.03(2)<br>2.19(4) | 7(1)<br>2(4) | -12(2) | 35.23 | 3.5  | 0.0708 |
| 7 N/O<br>(1 Im)          | 2.04(1)            | 10(1)        | -13(2) | 38.84 | 3.21 | 0.0781 |
| 3 N/O<br>3 N/O<br>(3 Im) | 1.98(1)<br>2.13(2) | 2(1)<br>4(2) | -12(2) | 18.07 | 1.79 | 0.0363 |
| 6 N/O<br>(3 Im)          | 2.03(1)            | 8(1)         | -14(2) | 22.99 | 1.9  | 0.0462 |
| 2 N/O<br>3N/O<br>(3 Im)  | 1.97(1)<br>2.11(1) | 0(1)<br>2(1) | -12(2) | 18.71 | 1.85 | 0.0376 |
| 5 N/O<br>(3 Im)          | 2.03(1)            | 6(1)         | -14(2) | 25.71 | 2.13 | 0.0517 |
| 4 N/O<br>3 N/O<br>(3 Im) | 2.00(2)<br>2.14(4) | 5(2)<br>8(6) | -12(2) | 24.81 | 2.46 | 0.0498 |
| 7 N/O<br>(3 Im)          | 2.04(1)            | 9(1)         | -14(2) | 27.31 | 2.26 | 0.0549 |
| 2 N/O<br>1 N/O<br>(2 Im) | 2.0(1)<br>2.2(1)   | 2(2)<br>0(2) | -6(16) | 37.47 | 4.64 | 0.0753 |
| 1 O                      | 1.93(7)            | 5(2)         |        |       |      |        |
| 1 O                      | 2.04(7)            |              |        |       |      |        |
| 1 C                      | 2.71(7)            |              |        |       |      |        |
| 1 C                      | 2.80(7)            |              |        |       |      |        |
| 3 N/O<br>(2 Im)          | 2.14(4)            | 9(3)         | -2(3)  | 28.53 | 2.83 | 0.0573 |
| 1 O                      | 1.93(2)            | 2(2)         |        |       |      |        |
| 1 O                      | 2.04(2)            |              |        |       |      |        |
| 1 C                      | 2.71(2)            |              |        |       |      |        |



**Table S8.** EXAFS analysis of Fe(JMJD2C)- $\alpha$ KG ( $k = 2 - 12.5 \text{ \AA}^{-1}$  fit in r-space with values  $r = 1 - 4.5$ ). Fits included in the text Table 1 are shown in **bold type**.

| Shell | $r(\text{\AA})$ | $\sigma^2(\text{\AA}^2)$ | $\Delta E_0(\text{eV})$ | $\chi^2$ | Red $\chi^2$ | R      |
|-------|-----------------|--------------------------|-------------------------|----------|--------------|--------|
| 2 N/O | 2.06(2)         | 2(1)                     | -10(4)                  | 237.8    | 11.85        | 0.2844 |
| 3 N/O | 2.06(2)         | 4(1)                     | -11(3)                  | 165      | 8.22         | 0.1973 |
| 4 N/O | 2.06(1)         | 6(1)                     | -12(2)                  | 139.29   | 6.94         | 0.1666 |
| 5 N/O | 2.06(1)         | 8(1)                     | -12(2)                  | 140.89   | 7.02         | 0.1685 |
| 6 N/O | 2.05(2)         | 10(1)                    | -13(2)                  | 157.86   | 7.86         | 0.1888 |
| 7 N/O | 2.05(2)         | 12(1)                    | -14(2)                  | 182.66   | 9.1          | 0.2184 |
| 2 S   | 2.15(2)         | 6(1)                     | -31(5)                  | 223.82   | 11.15        | 0.2677 |
| 3 S   | 2.15(2)         | 9(1)                     | -31(4)                  | 180.92   | 9.01         | 0.2164 |
| 4 S   | 2.15(2)         | 12(1)                    | -31(4)                  | 168.09   | 8.37         | 0.201  |
| 5 S   | 2.15(2)         | 14(1)                    | -32(4)                  | 169.24   | 8.34         | 0.2024 |
| 6 S   | 2.16(2)         | 16(1)                    | -32(4)                  | 177.14   | 8.82         | 0.2118 |
| 7 S   | 2.16(3)         | 17(1)                    | -32(4)                  | 188.25   | 9.38         | 0.2251 |
| 2 N/O | 2.01(3)         | 1(3)                     |                         |          |              |        |
| 1 N/O | 2.15(4)         | 0(5)                     | -10(3)                  | 151.71   | 8.39         | 0.1814 |
| 2 N/O | 2.00(2)         | 2(3)                     |                         |          |              |        |
| 2 N/O | 2.15(3)         | 3(2)                     | -11(3)                  | 132.22   | 7.31         | 0.1581 |
| 3 N/O | 2.01(2)         | 3(2)                     |                         |          |              |        |
| 1 N/O | 2.15(4)         | 4(4)                     | -11(3)                  | 133.53   | 7.39         | 0.1597 |
| 4 N/O | 2.06(2)         | 6(2)                     |                         |          |              |        |
| 1 N/O | 2.20(2)         | 8(3)                     | -10(3)                  | 136.37   | 7.54         | 0.1631 |
| 3 N/O | 2.05(2)         | 5(2)                     |                         |          |              |        |
| 2 N/O | 2.1(1)          | 15(1)                    | -10(3)                  | 137.1    | 7.59         | 0.1639 |
| 5 N/O | 2.07(2)         | 8(1)                     |                         |          |              |        |
| 1 N/O | 2.4(1)          | 15(24)                   | -11(2)                  | 138.8    | 7.68         | 0.166  |

|       |         |        |        |        |       |        |
|-------|---------|--------|--------|--------|-------|--------|
| 4 N/O | 2.07(2) | 6(1)   |        |        |       |        |
| 2 N/O | 2.3(1)  | 27(31) | -9(3)  | 138.07 | 7.64  | 0.1651 |
| 3 N/O | 2.06(2) | 5(1)   |        |        |       |        |
| 3 N/O | 2.2(1)  | 28(20) | -9(4)  | 142.43 | 7.88  | 0.1703 |
| 6 N/O | 2.07(2) | 10(1)  |        |        |       |        |
| 1 N/O | 2.39(9) | 11(14) | -12(2) | 149.24 | 8.26  | 0.1785 |
| 5 N/O | 2.07(2) | 8(1)   |        |        |       |        |
| 2 N/O | 2.36(8) | 21(19) | -10(2) | 139.79 | 7.73  | 0.1672 |
| 4 N/O | 2.07(2) | 6(1)   |        |        |       |        |
| 3 N/O | 2.31(9) | 32(26) | -8(3)  | 139.11 | 7.7   | 0.1663 |
| 2 S   | 2.16(2) | 7(1)   |        |        |       |        |
| 1 S   | 0.30(3) | 28(12) | -29(4) | 186.26 | 10.31 | 0.2228 |
| 2 S   | 2.14(3) | 6(3)   |        |        |       |        |
| 2 S   | 2.27(6) | 11(6)  | -26(5) | 157.54 | 8.72  | 0.1884 |
| 3 S   | No fit  |        |        |        |       |        |
| 1 S   |         |        |        |        |       |        |
| 4 S   | No fit  |        |        |        |       |        |
| 1 S   |         |        |        |        |       |        |
| 3 S   | 2.15(3) | 9(1)   |        |        |       |        |
| 2 S   | 1.5(3)  | 47(47) | -32(6) | 178.54 | 9.88  | 0.2135 |
| 5 S   | No fit  |        |        |        |       |        |
| 1 S   |         |        |        |        |       |        |
| 4 S   | 2.17(2) | 10(2)  |        |        |       |        |
| 2 S   | 2.37(5) | 13(6)  | -25(4) | 149.35 | 8.26  | 0.1786 |
| 3 S   | 2.33(6) | 17(8)  |        |        |       |        |
| 3 S   | 2.16(2) | 9(2)   | -25(4) | 149.51 | 8.27  | 0.1788 |
| 6 S   | 2.17(2) | 16(1)  |        |        |       |        |
| 1 S   | 2.98(2) | 4(2)   | -29(3) | 117.77 | 6.51  | 0.1408 |
| 5 S   | No fit  |        |        |        |       |        |
| 2 S   |         |        |        |        |       |        |

|       |         |         |        |        |       |        |
|-------|---------|---------|--------|--------|-------|--------|
| 4 S   | 2.15(2) | 11(1)   |        |        |       |        |
| 3 S   | 1.2(5)  | 73(138) | -32(5) | 165.39 | 9.15  | 0.1978 |
| 2 N/O | 2.01(3) | 3(2)    |        |        |       |        |
| 1 S   | 2.25(4) | 7(3)    | -17(4) | 166.59 | 9.22  | 0.1992 |
| 1 N/O | 1.4(1)  | 13(14)  |        |        |       |        |
| 2 S   | 2.15(3) | 6(1)    | -31(6) | 217.86 | 12.06 | 0.2605 |
| 2 N/O | 2.01(3) | 4(2)    |        |        |       |        |
| 2 S   | 2.24(5) | 13(4)   | -19(4) | 158.18 | 8.75  | 0.1892 |
| 3 N/O | 2.04(2) | 5(1)    |        |        |       |        |
| 1 S   | 2.29(7) | 14(8)   | -14(3) | 147.1  | 8.14  | 0.1759 |
| 1 N/O | 1.99(4) | 3(3)    |        |        |       |        |
| 3 S   | 2.20(4) | 13(3)   | -24(5) | 164.36 | 9.09  | 0.1966 |
| 1 N/O | No fit  |         |        |        |       |        |
| 4 S   |         |         |        |        |       |        |
| 4 N/O | 2.07(2) | 8(2)    |        |        |       |        |
| 1 S   | 1.85(4) | 20(10)  | -7(2)  | 127.11 | 7.03  | 0.152  |
| 2 N/O | 0.86(7) | 7(7)    |        |        |       |        |
| 3 S   | 2.15(2) | 9(1)    | -31(4) | 175.45 | 9.71  | 0.2098 |
| 3 N/O | 2.30(5) | 0(4)    |        |        |       |        |
| 2 S   | 2.27(4) | 3(3)    | -1(5)  | 393.95 | 21.8  | 0.4712 |
| 5 N/O | 2.06(2) | 9(2)    |        |        |       |        |
| 1 S   | 1.89(6) | 20(14)  | -9(3)  | 131.59 | 7.28  | 0.1574 |
| 1 N/O | No fit  |         |        |        |       |        |
| 5 S   |         |         |        |        |       |        |
| 4 N/O | 2.07(1) | 6(1)    |        |        |       |        |
| 2 S   | 2.62(6) | 25(10)  | -9(2)  | 121.47 | 6.72  | 0.1453 |
| 2 N/O | 1.8(1)  | 28(43)  |        |        |       |        |
| 4 S   | 2.15(3) | 11(2)   | -33(6) | 164.42 | 9.1   | 0.1966 |
| 3 N/O | 2.06(1) | 4(1)    |        |        |       |        |
| 3 S   | 2.5(1)  | 39(18)  | -9(3)  | 136.07 | 7.53  | 0.1627 |
| 6 N/O | 2.05(2) | 9(2)    |        |        |       |        |

|                          |                            |                      |              |              |             |              |
|--------------------------|----------------------------|----------------------|--------------|--------------|-------------|--------------|
| 1 S                      | 1.9(1)                     | 18(14)               | -11(3)       | 137.78       | 7.62        | 0.1648       |
| 1 N/O<br>6 S             | No fit                     |                      |              |              |             |              |
| 5 N/O<br>2 S             | 2.07(2)<br>1.91(4)         | 9(2)<br>26(11)       | -7(3)        | 127.8        | 7.07        | 0.1528       |
| 2 N/O<br>5 S             | 1.61(4)<br>2.7(1)          | 23(9)<br>63(39)      | 10.9(4)      | 520.39       | 28.8        | 0.6224       |
| 4 N/O<br>3 S             | 2.07(1)<br>2.62(5)         | 6(1)<br>30(10)       | -8(2)        | 118.63       | 6.56        | 0.1419       |
| 3 N/O<br>4 S             | 2.07(1)<br>2.55(9)         | 4(1)<br>42(15)       | -9(2)        | 131.76       | 7.29        | 0.1576       |
| 2 N/O<br>2 N/O           | 1.99(2)<br>2.11(2)         | 2(2)<br>2(2)         | -13(2)       | 23.49        | 2.33        | 0.0281       |
| (2 Im)                   |                            |                      |              |              |             |              |
| 3 N/O<br>1 N/O<br>(1 Im) | 2.12(2)<br>1.98(2)         | 5(2)<br>0(2)         | -10(2)       | 32.98        | 3.27        | 0.0394       |
| 3 N/O<br>1 N/O<br>(3 Im) | 2.00(1)<br>2.12(3)         | 4(2)<br>1(3)         | -16(2)       | 26.22        | 2.6         | 0.0313       |
| 4 N/O<br>1 N/O<br>(1 Im) | 2.09(4)<br>2.00(3)         | 10(3)<br>2(3)        | -12(3)       | 41.72        | 4.14        | 0.0499       |
| 4 N/O<br>1 N/O<br>(4 Im) | 2.06(1)<br>1.90(8)         | 6(1)<br>12(14)       | -19(2)       | 28.4         | 2.82        | 0.0339       |
| 3 N/O<br>2 N/O<br>(3 Im) | 2.04(2)<br>2.00(8)         | 5(1)<br>13(8)        | -17(2)       | 25.12        | 2.49        | 0.03         |
| <b>3 N/O<br/>2 N/O</b>   | <b>2.01(2)<br/>2.17(4)</b> | <b>3(2)<br/>9(7)</b> | <b>-9(2)</b> | <b>20.94</b> | <b>2.08</b> | <b>0.025</b> |

|               |         |        |        |       |      |        |
|---------------|---------|--------|--------|-------|------|--------|
| <b>(2 Im)</b> |         |        |        |       |      |        |
| 5 N/O         | 2.14(4) | 16(4)  |        |       |      |        |
| 1 N/O         | 2.00(2) | 1(2)   | -10(2) | 75.31 | 7.48 | 0.09   |
| (1 Im)        | <hr/>   |        |        |       |      |        |
| 5 N/O         | 2.02(1) | 8(1)   |        |       |      |        |
| 1 N/O         | 2.45(6) | 11(11) | -20(2) | 51.56 | 5.12 | 0.0616 |
| (5 Im)        |         |        |        |       |      |        |
| 4 N/O         | 2.06(1) | 6(1)   |        |       |      |        |
| 2 N/O         | 1.91(9) | 26(18) | -19(2) | 29.99 | 2.98 | 0.0358 |
| (4 Im)        |         |        |        |       |      |        |
| 4 N/O         | 2.04(1) | 6(1)   |        |       |      |        |
| 2 N/O         | 2.0(3)  | 13(8)  | -15(3) | 22.77 | 2.26 | 0.0272 |
| (2 Im)        |         |        |        |       |      |        |
| 3 N/O         | 2.04(1) | 5(1)   |        |       |      |        |
| 3 N/O         | 2.01(8) | 23(8)  | -17(3) | 27.28 | 2.71 | 0.0326 |
| (3 Im)        |         |        |        |       |      |        |
| 5 N/O         | 2.06(2) | 8(1)   |        |       |      |        |
| 2 N/O         | 2.34(8) | 18(16) | -10(3) | 36.77 | 3.65 | 0.044  |
| (2 Im)        |         |        |        |       |      |        |
| 5 N/O         | 2.03(1) | 8(1)   |        |       |      |        |
| 2 N/O         | 2.71(3) | 11(2)  | -18(2) | 60.18 | 5.98 | 0.0719 |
| (5 Im)        |         |        |        |       |      |        |
| 4 N/O         | 2.03(1) | 6(1)   |        |       |      |        |
| 3 N/O         | 2.0(1)  | 39(22) | -18(3) | 23.63 | 2.34 | 0.0284 |
| (4 Im)        |         |        |        |       |      |        |
| 4 N/O         | 2.0(1)  | 31(9)  |        |       |      |        |
| 3 N/O         | 2.03(1) | 5(1)   | -17(3) | 29.61 | 2.94 | 0.0354 |
| (3 Im)        |         |        |        |       |      |        |
| 6 N/O         | 2.04(2) | 1(2)   |        |       |      |        |
| 1 N/O         | 2.09(7) | 20(4)  | -12(5) | 67.94 | 6.75 | 0.0812 |
| (1 Im)        |         |        |        |       |      |        |
| 2 N/O         | 2.06(2) | 0(1)   | -1(3)  | 24.16 | 2.4  | 0.0311 |

|               |                |             |              |              |             |               |
|---------------|----------------|-------------|--------------|--------------|-------------|---------------|
| ( 2 Im)       |                |             |              |              |             |               |
| 1 O           | 1.93(3)        | 2(2)        |              |              |             |               |
| 1 O           | 2.14(3)        |             |              |              |             |               |
| 1 C           | 2.65(3)        |             |              |              |             |               |
| 1 C           | 2.75(3)        |             |              |              |             |               |
| <b>3 N/O</b>  | <b>2.05(2)</b> | <b>4(1)</b> | <b>-2(4)</b> | <b>12.89</b> | <b>1.28</b> | <b>0.0154</b> |
| <b>(2 Im)</b> |                |             |              |              |             |               |
| <b>1 O</b>    | <b>1.92(7)</b> | <b>6(4)</b> |              |              |             |               |
| <b>1 O</b>    | <b>2.13(7)</b> |             |              |              |             |               |
| <b>1 C</b>    | <b>2.64(7)</b> |             |              |              |             |               |
| <b>1 C</b>    | <b>2.74(7)</b> |             |              |              |             |               |
| 2 N/O         | 2.01(2)        | 2(2)        | -4(5)        | 41.44        | 5.14        | 0.0495        |
| 1 N/O         | 2.15(3)        | 0(2)        |              |              |             |               |
| (2 Im)        |                |             |              |              |             |               |
| 1 O           | 1.93(2)        | 20(17)      |              |              |             |               |
| 1 O           | 2.14(2)        |             |              |              |             |               |
| 1 C           | 2.65(2)        |             |              |              |             |               |
| 1 C           | 2.75(2)        |             |              |              |             |               |
| 4 N/O         | 2.05(2)        | 6(1)        | -4(4)        | 35.24        | 3.5         | 0.0421        |
| (2 Im)        |                |             |              |              |             |               |
| 1 O           | 1.84(1)        | 18(19)      |              |              |             |               |
| 1 O           | 2.05(1)        |             |              |              |             |               |
| 1 C           | 2.56(1)        |             |              |              |             |               |
| 1 C           | 2.66(1)        |             |              |              |             |               |
| 2 N/O         | 2.01(3)        | 3(3)        | -6(8)        | 40.93        | 5.07        | 0.0489        |
| 2 N/O         | 2.13(7)        | 5(4)        |              |              |             |               |
| (2 Im)        |                |             |              |              |             |               |
| 1 O           | 1.99(3)        | 11(40)      |              |              |             |               |
| 1 O           | 2.20(3)        |             |              |              |             |               |
| 1 C           | 2.71(3)        |             |              |              |             |               |
| 1 C           | 2.81(3)        |             |              |              |             |               |
| 3 N/O         | 2.03(2)        | 4(2)        | -3(7)        | 37.37        | 4.63        | 0.0447        |
| 1 N/O         | 2.16(6)        | 3(5)        |              |              |             |               |
| (2 Im)        |                |             |              |              |             |               |
| 1 O           | 1.87(4)        | 42(20)      |              |              |             |               |
| 1 O           | 2.08(4)        |             |              |              |             |               |
| 1 C           | 2.59(4)        |             |              |              |             |               |
| 1 C           | 2.69(4)        |             |              |              |             |               |



**Table S9.** EXAFS analysis of Fe(JMJD2C)- $\alpha$ KG + substrate ( $k = 2 - 12.5 \text{ \AA}^{-1}$  fit in r-space with values  $r = 1 - 4.5$ ). Fits included in the text Table 1 are shown in **bold type**.

| Shell | $r(\text{\AA})$ | $\sigma^2(\text{\AA}^2)$ | $\Delta E_0(\text{eV})$ | $\chi^2$ | Red $\chi^2$ | R      |
|-------|-----------------|--------------------------|-------------------------|----------|--------------|--------|
| 2 N/O | 2.17(2)         | 1(1)                     | -7(3)                   | 2424.86  | 114.55       | 0.2855 |
| 3 N/O | 2.17(1)         | 3(1)                     | -8(2)                   | 1665.95  | 78.7         | 0.1961 |
| 4 N/O | 2.16(1)         | 5(1)                     | -9(2)                   | 1386.4   | 65.49        | 0.1632 |
| 5 N/O | 2.16(1)         | 7(1)                     | -10(2)                  | 1388.75  | 65.6         | 0.1635 |
| 6 N/O | 2.16(1)         | 9(1)                     | -11(2)                  | 1551.6   | 73.3         | 0.1827 |
| 7 N/O | 2.15(2)         | 11(1)                    | -12(2)                  | 1789.17  | 84.95        | 0.2117 |
| 2 S   | 2.27(2)         | 6(1)                     | -24(4)                  | 1948.89  | 92.07        | 0.2294 |
| 3 S   | 2.26(2)         | 8(1)                     | -25(3)                  | 1582.75  | 74.77        | 0.1863 |
| 4 S   | 2.26(2)         | 11(1)                    | -26(3)                  | 1528.99  | 72.23        | 0.18   |
| 5 S   | 2.26(2)         | 13(1)                    | -27(3)                  | 1607.81  | 75.95        | 0.1893 |
| 6 S   | 3(1)            | 134(365)                 | 10(5)                   | 8333.2   | 393.68       | 0.9812 |
| 7 S   | 2.26(2)         | 17(1)                    | -28(3)                  | 1897.24  | 89.63        | 0.2233 |
| 2 N/O | 2.13(5)         | 3(6)                     |                         |          |              |        |
| 1 N/O | 2.21(6)         | 0(4)                     | -9(3)                   | 1523.58  | 79.48        | 0.1794 |
| 2 N/O | 2.06(2)         | 2(2)                     |                         |          |              |        |
| 2 N/O | 2.22(2)         | 3(2)                     | -11(2)                  | 1120.84  | 58.47        | 0.1319 |
| 3 N/O | 2.19(1)         | 1(1)                     |                         |          |              |        |
| 1 N/O | 2.04(2)         | 0(2)                     | -10(2)                  | 1175.12  | 61.31        | 0.1383 |
| 4 N/O | No fit          |                          |                         |          |              |        |
| 1 N/O |                 |                          |                         |          |              |        |
| 3 N/O | 2.06(2)         | 5(3)                     |                         |          |              |        |

|       |         |         |        |         |        |        |
|-------|---------|---------|--------|---------|--------|--------|
| 2 N/O | 2.22(2) | 3(2)    | -12(2) | 1147.17 | 59.85  | 0.135  |
| 5 N/O | 2.2(2)  | 37(15)  |        |         |        |        |
| 1 N/O | 2.17(2) | 0(2)    | -7(8)  | 2630.75 | 137.25 | 0.3097 |
| 4 N/O | 2.18(1) | 5(1)    |        |         |        |        |
| 2 N/O | 2.49(5) | 14(9)   | -6(2)  | 1272.69 | 66.4   | 0.1498 |
| 3 N/O | 2.04(3) | 9(4)    |        |         |        |        |
| 3 N/O | 2.19(2) | 3(2)    | -14(2) | 1263.43 | 65.91  | 0.1487 |
| 6 N/O | 2.16(2) | 9(1)    |        |         |        |        |
| 1 N/O | 6(2)    | 0(93)   | -11(2) | 1549.6  | 80.84  | 0.1824 |
| 5 N/O | 2.18(1) | 7(1)    |        |         |        |        |
| 2 N/O | 2.50(2) | 7(3)    | -7(2)  | 1100.45 | 57.41  | 0.1295 |
| 4 N/O | 2.03(4) | 14(6)   |        |         |        |        |
| 3 N/O | 2.19(2) | 4(1)    | -15(2) | 1367.48 | 71.34  | 0.161  |
| 2 S   | 2.26(2) | 6(1)    |        |         |        |        |
| 1 S   | 0.30(3) | 30(14)  | -28(4) | 1487.25 | 77.59  | 0.1751 |
| 2 S   | No fit  |         |        |         |        |        |
| 2 S   |         |         |        |         |        |        |
| 3 S   | No fit  |         |        |         |        |        |
| 1 S   |         |         |        |         |        |        |
| 4 S   | No fit  |         |        |         |        |        |
| 1 S   |         |         |        |         |        |        |
| 3 S   | 2.26(2) | 8(1)    |        |         |        |        |
| 2 S   | 1.6(1)  | 39(17)  | -26(4) | 1441.82 | 75.22  | 0.1697 |
| 5 S   | 2.30(2) | 12(1)   |        |         |        |        |
| 1 S   | 2.56(2) | 5(2)    | -21(3) | 1087.15 | 56.72  | 0.128  |
| 4 S   | 2.30(2) | 9(1)    |        |         |        |        |
| 2 S   | 2.53(3) | 11(3)   | -19(3) | 1138.31 | 59.38  | 0.134  |
| 3 S   | 3.2(4)  | 69(117) |        |         |        |        |
| 3 S   | 1.94(3) | 22(3)   | 5(3)   | 3248.35 | 169.47 | 0.3824 |
| 6 S   | 2.30(2) | 14(1)   |        |         |        |        |
| 1 S   | 2.56(2) | 4(2)    | -22(2) | 1049.68 | 54.76  | 0.1235 |

|       |         |          |        |         |        |        |
|-------|---------|----------|--------|---------|--------|--------|
| 5 S   | 2.25(2) | 13(1)    |        |         |        |        |
| 2 S   | 0.10(4) | 207(38)  | -29(4) | 1551.2  | 80.93  | 0.1826 |
| 4 S   | 2.26(2) | 11(1)    |        |         |        |        |
| 3 S   | 1.5(1)  | 52(33)   | -27(4) | 1471.79 | 76.78  | 0.1733 |
| 2 N/O | 2.19(1) | 2(1)     |        |         |        |        |
| 1 S   | 1.88(3) | 15(4)    | -4(2)  | 1317.69 | 68.74  | 0.1551 |
| 1 N/O | 2.19(3) | 0(2)     |        |         |        |        |
| 2 S   | 1.8(2)  | 56(31)   | -4(8)  | 3405.95 | 177.69 | 0.401  |
| 2 N/O | 2.79(8) | 15(14)   |        |         |        |        |
| 2 S   | 1.97(2) | 15(2)    | 9(2)   | 2650.37 | 138.27 | 0.312  |
| 3 N/O | 2.18(1) | 4(1)     |        |         |        |        |
| 1 S   | 1.86(5) | 22(7)    | -6(2)  | 1235.2  | 64.44  | 0.1454 |
| 1 N/O | 1.35(8) | 26(23)   |        |         |        |        |
| 3 S   | 1.94(3) | 20(3)    | 4(3)   | 2811.77 | 146.69 | 0.331  |
| 1 N/O | 1.3(1)  | 29(33)   |        |         |        |        |
| 4 S   | 1.93(3) | 26(3)    | 3(3)   | 3148.12 | 164.24 | 0.3706 |
| 4 N/O | 2.17(1) | 5(1)     |        |         |        |        |
| 1 S   | 2.73(7) | 18(12)   | -8(2)  | 1236.4  | 64.5   | 0.1455 |
| 2 N/O | 2.19(1) | 2(1)     |        |         |        |        |
| 3 S   | 1.92(4) | 34(5)    | -2(2)  | 1197.6  | 62.48  | 0.141  |
| 3 N/O | 2.18(1) | 4(1)     |        |         |        |        |
| 2 S   | 1.90(6) | 34(9)    | -5(2)  | 1217.25 | 63.5   | 0.1433 |
| 5 N/O | 2.17(1) | 7(1)     |        |         |        |        |
| 1 S   | 1.1(2)  | 48(53)   | -9(2)  | 1340.86 | 69.95  | 0.1578 |
| 1 N/O | 0.14(5) | 744(209) |        |         |        |        |
| 5 S   | 1.93(4) | 34(5)    | 4(3)   | 3635.23 | 189.66 | 0.428  |
| 4 N/O | 2.1(1)  | 20(6)    |        |         |        |        |
| 2 S   | 2.28(2) | 7(2)     | -22(7) | 1319.94 | 68.86  | 0.1554 |
| 2 N/O | 2.76(9) | 14(15)   |        |         |        |        |
| 4 S   | 1.95(3) | 28(4)    | 6(3)   | 3229.22 | 168.47 | 0.3802 |

|                                   |                            |                      |               |               |              |               |
|-----------------------------------|----------------------------|----------------------|---------------|---------------|--------------|---------------|
| 3 N/O<br>3 S                      | 2.18(1)<br>1.93(5)         | 4(1)<br>41(9)        | -4(2)         | 1188.62       | 62.01        | 0.1399        |
| 6 N/O<br>1 S                      | No fit                     |                      |               |               |              |               |
| 1 N/O<br>6 S                      | No fit                     |                      |               |               |              |               |
| 5 N/O<br>2 S                      | 2.17(2)<br>2.0(2)          | 7(1)<br>56(80)       | -9(5)         | 1354.01       | 70.64        | 0.1594        |
| 2 N/O<br>5 S                      | 1.2(1)<br>1.92(4)          | 58(49)<br>30(4)      | 2(3)          | 3439.03       | 179.42       | 0.4049        |
| 4 N/O<br>3 S                      | 2.18(1)<br>1.96(7)         | 6(1)<br>50(23)       | -6(3)         | 1256.29       | 65.54        | 0.1479        |
| 3 N/O<br>4 S                      | 2.19(1)<br>1.96(4)         | 4(1)<br>45(9)        | -3(2)         | 1155.57       | 60.28        | 0.136         |
| 3 N/O<br>1 N/O<br>(1 Im)          | 2.18(1)<br>2.04(2)         | 1(1)<br>0(2)         | -11(2)        | 576.58        | 51.63        | 0.0678        |
| 2 N/O<br>2 N/O<br>(2 Im)          | 2.08(3)<br>2.23(3)         | 4(5)<br>1(2)         | -4(3)         | 512.2         | 45.86        | 0.0603        |
| 1 N/O<br>3 N/O<br>(3 Im)          | 2.03(2)<br>2.19(1)         | 0(2)<br>1(1)         | -11(2)        | 610.35        | 54.65        | 0.0718        |
| 4 N/O<br>1 N/O<br>(1 Im)          | 2.16(1)<br>2.01(2)         | 3(1)<br>1(2)         | -12(2)        | 491.76        | 44.03        | 0.0679        |
| <b>3 N/O<br/>2 N/O<br/>(2 Im)</b> | <b>2.19(2)<br/>2.04(2)</b> | <b>2(1)<br/>3(2)</b> | <b>-10(2)</b> | <b>366.51</b> | <b>32.42</b> | <b>0.0431</b> |
| 2 N/O<br>3 N/O<br>(3 Im)          | 2.21(1)<br>2.05(2)         | 1(1)<br>5(2)         | -14(2)        | 446.54        | 39.98        | 0.0525        |
| 4 N/O                             | 2.17(1)                    | 5(1)                 | -9(2)         | 805.44        | 61.17        | 0.0948        |

|                          |                    |              |              |               |              |               |
|--------------------------|--------------------|--------------|--------------|---------------|--------------|---------------|
| (1 Im)                   |                    |              |              |               |              |               |
| 4 N/O<br>(2 Im)          | 2.17(1)            | 5(1)         | -9(2)        | 729.18        | 55.37        | 0.0858        |
| 4 N/O<br>(3 Im)          | 2.17(1)            | 5(1)         | -9(2)        | 761.6         | 57.84        | 0.0896        |
| 5 N/O<br>(1 Im)          | 2.16(1)            | 7(1)         | -10(2)       | 847.58        | 64.37        | 0.0998        |
| 5 N/O<br>(2 Im)          | 2.16(1)            | 7(1)         | -10(2)       | 707.78        | 53.75        | 0.0833        |
| 5 N/O<br>(3 Im)          | 2.16(1)            | 7(1)         | -11(2)       | 725.95        | 55.13        | 0.0854        |
| <b>3 N/O<br/>(2 Im)</b>  | <b>2.16(1)</b>     | <b>2(1)</b>  | <b>-1(2)</b> | <b>275.68</b> | <b>24.69</b> | <b>0.0325</b> |
| 1 O                      | 2.01(2)            | 2(2)         |              |               |              |               |
| 1 O                      | 2.22(2)            |              |              |               |              |               |
| 1 C                      | 2.73(2)            |              |              |               |              |               |
| 1 C                      | 2.83(2)            |              |              |               |              |               |
| 2 N/O<br>1 N/O<br>(2 Im) | 2.17(7)<br>2.15(5) | 6(6)<br>3(3) | 0(3)         | 395.77        | 43.17        | 0.0466        |
| 1 O                      | 2.03(3)            | 4(4)         |              |               |              |               |
| 1 O                      | 2.24(3)            |              |              |               |              |               |
| 1 C                      | 2.75(3)            |              |              |               |              |               |
| 1 C                      | 2.85(3)            |              |              |               |              |               |

**Table S10.** EXAFS analysis of Ni(JMJD2C) ( $k = 2 - 12.5 \text{ \AA}^{-1}$  fit in r-space with values  $r = 1 - 4.5$ ). Fits included in the text Table 1 are shown in **bold type**.

| Shell | $r(\text{\AA})$ | $\sigma^2(\text{\AA}^2)$ | $\Delta E_0(\text{eV})$ | $\chi^2$ | Red $\chi^2$ | R      |
|-------|-----------------|--------------------------|-------------------------|----------|--------------|--------|
| 2 N/O | 2.10(3)         | 0(2)                     | -1(5)                   | 1255.73  | 59.32        | 0.4299 |
| 3 N/O | 2.10(2)         | 1(1)                     | -2(3)                   | 890.67   | 42.07        | 0.3049 |
| 4 N/O | 2.10(1)         | 2(1)                     | -2(2)                   | 664.08   | 31.37        | 0.2273 |
| 5 N/O | 2.10(1)         | 3(1)                     | -3(2)                   | 532.14   | 25.14        | 0.1822 |
| 6 N/O | 2.10(1)         | 5(1)                     | -3(2)                   | 471.45   | 22.27        | 0.1614 |
| 7 N/O | 2.10(1)         | 6(1)                     | -4(2)                   | 465.04   | 21.97        | 0.1592 |
| 8 N/O | 2.10(1)         | 7(1)                     | -4(2)                   | 499.44   | 23.59        | 0.171  |
| 2 S   | 2.19(2)         | 3(1)                     | -21(6)                  | 1017.81  | 48.08        | 0.3485 |
| 3 S   | 2.19(2)         | 5(1)                     | -22(4)                  | 759.53   | 35.88        | 0.26   |
| 4 S   | 2.19(2)         | 7(1)                     | -22(4)                  | 625.12   | 29.53        | 0.214  |
| 5 S   | 2.19(2)         | 8(1)                     | -22(3)                  | 563.29   | 26.61        | 0.1928 |
| 6 S   | 2.19(2)         | 10(1)                    | -23(3)                  | 545.93   | 25.79        | 0.1869 |
| 7 S   | 2.19(2)         | 11(1)                    | -23(3)                  | 556.16   | 26.27        | 0.1904 |
| 2 N/O | 2.1(3)          | 1(21)                    |                         |          |              |        |
| 1 N/O | 2.1(5)          | 0(30)                    | -2(5)                   | 871.75   | 45.48        | 0.2984 |
| 2 N/O | 2.05(5)         | 0(6)                     |                         |          |              |        |
| 2 N/O | 2.14(5)         | 0(6)                     | -2(3)                   | 610.27   | 31.83        | 0.2089 |
| 3 N/O | 2.09(6)         | 2(8)                     |                         |          |              |        |
| 1 N/O | 2.2(2)          | 0(130)                   | -2(3)                   | 640.17   | 33.39        | 0.2192 |
| 4 N/O | 2.12(3)         | 3(5)                     |                         |          |              |        |
| 1 N/O | 2.03(9)         | 0(7)                     | -3(2)                   | 506.43   | 26.42        | 0.1734 |
| 3 N/O | 2.06(3)         | 1(3)                     |                         |          |              |        |
| 2 N/O | 2.16(4)         | 0(4)                     | -3(2)                   | 477.75   | 24.92        | 0.1635 |

|       |         |         |         |        |       |        |
|-------|---------|---------|---------|--------|-------|--------|
| 5 N/O | 2.10(1) | 4(1)    |         |        |       |        |
| 1 N/O | 1.53(9) | 19(18)  | -1(2)   | 485.74 | 25.34 | 0.1663 |
| 4 N/O | 2.06(2) | 2(2)    |         |        |       |        |
| 2 N/O | 2.18(3) | 0(3)    | -3(2)   | 428.03 | 22.33 | 0.1465 |
| 3 N/O | 2.04(2) | 2(2)    |         |        |       |        |
| 3 N/O | 2.14(2) | 3(2)    | -3(2)   | 406.13 | 21.18 | 0.139  |
| 6 N/O | 2.08(2) | 4(2)    |         |        |       |        |
| 1 N/O | 2.18(6) | 0(5)    | -4(2)   | 449.05 | 23.42 | 0.1537 |
| 4 N/O | 2.04(2) | 3(2)    |         |        |       |        |
| 3 N/O | 2.16(2) | 2(2)    | -4(2)   | 434.93 | 22.69 | 0.1489 |
| 5 N/O | 2.06(2) | 3(2)    |         |        |       |        |
| 2 N/O | 2.18(3) | 0(3)    | -4(2)   | 439.79 | 22.94 | 0.1505 |
| 2 S   | 2.23(3) | 2(2)    |         |        |       |        |
| 1 S   | 2.12(3) | 0(3)    | -21(5)  | 590.46 | 30.8  | 0.2276 |
| 2 S   | 2.13(2) | 1(2)    |         |        |       |        |
| 2 S   | 2.25(2) | 1(2)    | -22(4)  | 562.79 | 29.36 | 0.1927 |
| 3 S   | 2.23(2) | 3(2)    |         |        |       |        |
| 1 S   | 2.11(3) | 0(2)    | -21(4)  | 559.15 | 29.17 | 0.1914 |
| 4 S   | No fit  |         |         |        |       |        |
| 1 S   |         |         |         |        |       |        |
| 3 S   | 2.14(2) | 4(2)    |         |        |       |        |
| 2 S   | 2.27(3) | 3(3)    | -22(4)  | 542.38 | 28.29 | 0.1857 |
| 5 S   | 2.19(2) | 8(1)    |         |        |       |        |
| 1 S   | 12(24)  | 0(4)    | -22(3)  | 563.29 | 29.38 | 0.1928 |
| 4 S   | 2.18(3) | 7(3)    |         |        |       |        |
| 2 S   | 2.3(1)  | 12(19)  | -20(5)  | 531.61 | 27.73 | 0.182  |
| 3 S   | 2.17(5) | 6(3)    |         |        |       |        |
| 3 S   | 2.26(9) | 11(12)  | -20(5)  | 530.88 | 27.69 | 0.1817 |
| 6 S   | 2.19(5) | 10(1)   |         |        |       |        |
| 1 S   | 2(3)    | 45(580) | -23(18) | 540.51 | 28.2  | 0.185  |

|       |         |          |        |        |       |        |
|-------|---------|----------|--------|--------|-------|--------|
| 4 S   | 2.18(2) | 8(1)     |        |        |       |        |
| 3 S   | 3.47(9) | 15(12)   | -24(3) | 505.81 | 26.38 | 0.1731 |
| 5 S   | 2.19(2) | 8(1)     |        |        |       |        |
| 2 S   | 1.3(8)  | 80(268)  | -23(4) | 560.1  | 29.22 | 0.1917 |
| 2 N/O | 2.04(3) | 0(2)     |        |        |       |        |
| 1 S   | 2.27(3) | 1(2)     | -8(5)  | 712.82 | 37.19 | 0.244  |
| 1 N/O | 2.45(7) | 0(5)     |        |        |       |        |
| 2 S   | 2.17(3) | 3(1)     | -24(7) | 881.71 | 46    | 0.3019 |
| 2 N/O | 2.01(2) | 0(2)     |        |        |       |        |
| 2 S   | 2.24(2) | 3(1)     | -14(4) | 555.26 | 28.96 | 0.1901 |
| 3 N/O | 2.03(2) | 0(1)     |        |        |       |        |
| 1 S   | 2.27(2) | 0(1)     | -10(3) | 528.25 | 27.56 | 0.1808 |
| 1 N/O | 2.71(8) | 2(8)     |        |        |       |        |
| 3 S   | 2.19(2) | 5(1)     | -20(4) | 707.12 | 36.89 | 0.2421 |
| 4 N/O | 2.05(2) | 2(1)     |        |        |       |        |
| 1 S   | 2.28(2) | 1(2)     | -9(3)  | 486.54 | 25.38 | 0.1665 |
| 1 N/O | 0.1(1)  | 244(232) |        |        |       |        |
| 4 S   | 2.19(2) | 7(1)     | -23(4) | 619.79 | 32.33 | 0.2122 |
| 2 N/O | 2.01(3) | 2(2)     |        |        |       |        |
| 3 S   | 2.24(2) | 6(2)     | -15(4) | 536.47 | 27.98 | 0.1836 |
| 3 N/O | 2.03(2) | 2(2)     |        |        |       |        |
| 2 S   | 2.26(2) | 4(2)     | -12(3) | 522.33 | 27.25 | 0.1788 |
| 5 N/O | 2.11(1) | 3(1)     |        |        |       |        |
| 1 S   | 2.62(4) | 6(4)     | -1(2)  | 433.72 | 22.62 | 0.1485 |
| 1 N/O | No fit  |          |        |        |       |        |
| 5 S   |         |          |        |        |       |        |
| 4 N/O | 2.05(3) | 4(2)     |        |        |       |        |
| 2 S   | 2.26(3) | 7(3)     | -11(3) | 508.55 | 26.53 | 0.1741 |
| 2 N/O | 2.02(4) | 3(3)     |        |        |       |        |
| 4 S   | 2.28(3) | 9(2)     | -16(4) | 533.72 | 27.84 | 0.1827 |
| 3 N/O | 2.03(3) | 4(2)     |        |        |       |        |



|        |         |         |        |        |       |        |
|--------|---------|---------|--------|--------|-------|--------|
| 3 S    | 2.24(3) | 8(2)    | -14(4) | 526.63 | 27.47 | 0.1803 |
| 6 N/O  | 2.11(1) | 6(1)    |        |        |       |        |
| 1 S    | 1.87(4) | 13(6)   | 0(2)   | 402.68 | 21    | 0.1378 |
| 1 N/O  | No fit  |         |        |        |       |        |
| 6 S    |         |         |        |        |       |        |
| 5 N/O  | 2.07(2) | 5(2)    |        |        |       |        |
| 2 S    | 2.26(4) | 10(5)   | -9(3)  | 498.54 | 26.01 | 0.1707 |
| 2 N/O  | 2.72(5) | 5(6)    |        |        |       |        |
| 5 S    | 2.20(2) | 8(1)    | -20(3) | 469.55 | 24.49 | 0.1607 |
| 4 N/O  | 2.06(3) | 5(2)    |        |        |       |        |
| 3 S    | 2.25(4) | 11(4)   | -12(4) | 518.07 | 27.02 | 0.1773 |
| 3 N/O  | 0.9(4)  | 71(274) |        |        |       |        |
| 4 S    | 2.19(2) | 7(1)    | -22(4) | 621.9  | 32.44 | 0.2129 |
| 5 N/O  | 2.13(2) | 4(2)    |        |        |       |        |
| 1 N/O  | 2.00(4) | 0(3)    | -1(2)  | 257.16 | 23.02 | 0.088  |
| (1 Im) |         |         |        |        |       |        |
| 6 N/O  | 2.09(1) | 4(1)    | 6(2)   | 259.93 | 19.74 | 0.089  |
| (1 Im) |         |         |        |        |       |        |
| 4 N/O  | 2.12(2) | 2(2)    |        |        |       |        |
| 1 N/O  | 2.00(4) | 0(4)    | -1(2)  | 266.92 | 23.9  | 0.0913 |
| (1 Im) |         |         |        |        |       |        |
| 5 N/O  | 2.09(1) | 3(1)    | 6(2)   | 350.03 | 26.58 | 0.1198 |
| (1 Im) |         |         |        |        |       |        |
| 6 N/O  | 2.12(2) | 5(2)    |        |        |       |        |
| 1 N/O  | 2.00(4) | 0(3)    | -2(2)  | 252.55 | 22.61 | 0.0864 |
| (1 Im) |         |         |        |        |       |        |
| 7 N/O  | 2.09(1) | 5(1)    | 7(2)   | 206.17 | 15.65 | 0.0705 |
| (1 Im) |         |         |        |        |       |        |
| 3 N/O  | 2.16(1) | 1(1)    |        |        |       |        |
| 3 N/O  | 2.02(1) | 1(1)    | 1(1)   | 126.38 | 11.31 | 0.0432 |
| (3 Im) |         |         |        |        |       |        |
| 6 N/O  | 2.09(1) | 4(1)    | 6(1)   | 144.74 | 10.99 | 0.0495 |

|               |                |             |             |               |             |               |
|---------------|----------------|-------------|-------------|---------------|-------------|---------------|
| (3 Im)        |                |             |             |               |             |               |
| 2 N/O         | 2.16(2)        | 0(2)        |             |               |             |               |
| 3 N/O         | 2.03(1)        | 1(1)        | 1(1)        | 170.03        | 15.22       | 0.0582        |
| (3 Im)        |                |             |             |               |             |               |
| 5 N/O         | 2.08(1)        | 3(1)        | 5(2)        | 266.67        | 20.25       | 0.0913        |
| (3 Im)        |                |             |             |               |             |               |
| 4 N/O         | 2.13(3)        | 5(2)        |             |               |             |               |
| 3 N/O         | 2.04(3)        | 4(2)        | 0(1)        | 182.94        | 16.38       | 0.0626        |
| (3 Im)        |                |             |             |               |             |               |
| 7 N/O         | 2.09(1)        | 5(1)        | 6(1)        | 152.08        | 11.55       | 0.052         |
| (3 Im)        |                |             |             |               |             |               |
| 4 N/O         | 2.14(1)        | 2(1)        |             |               |             |               |
| 2 N/O         | 2.01(1)        | 1(1)        | 0(1)        | 152.48        | 13.65       | 0.0522        |
| (2 Im)        |                |             |             |               |             |               |
| <b>6 N/O</b>  | <b>2.09(1)</b> | <b>5(1)</b> | <b>6(1)</b> | <b>103.87</b> | <b>7.88</b> | <b>0.0355</b> |
| <b>(2 Im)</b> |                |             |             |               |             |               |
| 3 N/O         | 2.15(1)        | 1(1)        |             |               |             |               |
| 2 N/O         | 2.02(1)        | 0(2)        | 1(1)        | 153.88        | 13.79       | 0.0526        |
| (2 Im)        |                |             |             |               |             |               |
| 5 N/O         | 2.08(1)        | 3(1)        | 6(2)        | 257.48        | 19.55       | 0.0881        |
| (2 Im)        |                |             |             |               |             |               |
| 5 N/O         | 2.13(2)        | 5(2)        |             |               |             |               |
| 2 N/O         | 2.02(4)        | 3(3)        | -1(2)       | 167.78        | 15.02       | 0.0574        |
| (2 Im)        |                |             |             |               |             |               |
| 7N(2Im)       | 2.08(1)        | 5(1)        | 5(1)        | 170.1         | 12.91       | 0.0582        |
| 4 N/O         | 2.15(2)        | 4(2)        | 0(2)        | 150.72        | 13.49       | 0.0581        |
| (2 Im)        |                |             |             |               |             |               |
| 1 O           | 1.97(3)        | 3(2)        |             |               |             |               |
| 1 O           | 2.08(3)        |             |             |               |             |               |
| 1 C           | 2.75(3)        |             |             |               |             |               |
| 1 C           | 2.84(3)        |             |             |               |             |               |
| 3 N/O         | 2(1)           | 2(28)       | -2(4)       | 150.65        | 16.43       | 0.0515        |
| 1 N/O         | 2.1(5)         | 4(41)       |             |               |             |               |
| (2 Im)        |                |             |             |               |             |               |

|        |         |       |       |        |       |        |
|--------|---------|-------|-------|--------|-------|--------|
| 1 O    | 1.96(3) | 7(6)  |       |        |       |        |
| 1 O    | 2.07(3) |       |       |        |       |        |
| 1 C    | 2.74(3) |       |       |        |       |        |
| <hr/>  |         |       |       |        |       |        |
| 1 C    | 2.83(3) |       |       |        |       |        |
| 2 N/O  | 2(1)    | 4(77) | -1(4) | 115.67 | 12.61 | 0.0396 |
| 2 N/O  | 2.2(9)  | 3(39) |       |        |       |        |
| (2 Im) |         |       |       |        |       |        |
| 1 O    | 1.97(3) | 8(7)  |       |        |       |        |
| 1 O    | 2.08(3) |       |       |        |       |        |
| 1 C    | 2.75(3) |       |       |        |       |        |
| 1 C    | 2.84(3) |       |       |        |       |        |
| <hr/>  |         |       |       |        |       |        |

**Table S11.** EXAFS analysis of Ni(JMJD2C)- $\alpha$ KG ( $k = 2 - 12.5 \text{ \AA}^{-1}$  fit in r-space with values  $r = 1 - 4.5$ ). Fits included in the text Table 1 are shown in **bold type**.

| Shell | $r(\text{\AA})$ | $\sigma^2(\text{\AA}^2)$ | $\Delta E_0(\text{eV})$ | $\chi^2$ | Red $\chi^2$ | R      |
|-------|-----------------|--------------------------|-------------------------|----------|--------------|--------|
| 2 N/O | 2.10(2)         | 0(2)                     | -1(5)                   | 993.56   | 46.93        | 0.3889 |
| 3 N/O | 2.10(2)         | 1(1)                     | -1(3)                   | 683.45   | 32.28        | 0.2675 |
| 4 N/O | 2.10(1)         | 3(1)                     | -2(2)                   | 496.2    | 23.44        | 0.1942 |
| 5 N/O | 2.09(1)         | 4(1)                     | -3(2)                   | 394.99   | 18.66        | 0.1546 |
| 6 N/O | 2.09(1)         | 5(1)                     | -3(1)                   | 357.33   | 16.88        | 0.1398 |
| 7 N/O | 2.09(1)         | 6(1)                     | -4(1)                   | 366.68   | 17.32        | 0.1435 |
| 2 S   | 2.19(2)         | 3(1)                     | -21(6)                  | 810.22   | 38.27        | 0.3171 |
| 3 S   | 2.18(2)         | 5(1)                     | -21(4)                  | 596.72   | 28.19        | 0.2335 |
| 4 S   | 2.18(2)         | 7(1)                     | -22(3)                  | 490.33   | 23.16        | 0.1919 |
| 5 S   | 2.18(2)         | 9(1)                     | -22(3)                  | 445.32   | 21.03        | 0.1743 |
| 6 S   | 2.18(2)         | 10(1)                    | -23(3)                  | 437.08   | 20.64        | 0.171  |
| 7 S   | 2.18(2)         | 12(1)                    | -23(3)                  | 451.14   | 21.31        | 0.1765 |
| 2 N/O | 2.12(7)         | 0(8)                     |                         |          |              |        |
| 1 N/O | 2.0(2)          | 0(15)                    | -2(4)                   | 660.58   | 34.46        | 0.2585 |
| 2 N/O | 2.01(5)         | 1(6)                     |                         |          |              |        |
| 2 N/O | 2.16(4)         | 0(5)                     | -3(3)                   | 453.73   | 23.67        | 0.1776 |
| 3 N/O | 2.07(5)         | 2(7)                     |                         |          |              |        |
| 1 N/O | 2.1(1)          | 0(8)                     | -2(3)                   | 473.26   | 24.69        | 0.1852 |
| 4 N/O | 2.11(2)         | 2(2)                     |                         |          |              |        |
| 1 N/O | 2.00(5)         | 0(5)                     | -3(2)                   | 363      | 18.93        | 0.142  |
| 3 N/O | 2.01(3)         | 2(3)                     |                         |          |              |        |
| 2 N/O | 2.17(3)         | 0(3)                     | -3(2)                   | 352.16   | 18.37        | 0.1378 |
| 5 N/O | 2.03(2)         | 5(3)                     |                         |          |              |        |
| 1 N/O | 2.19(6)         | 0(4)                     | -4(2)                   | 335.69   | 17.51        | 0.1314 |
| 4 N/O | 2.02(2)         | 3(2)                     |                         |          |              |        |

|       |         |        |        |        |       |        |
|-------|---------|--------|--------|--------|-------|--------|
| 2 N/O | 2.17(3) | 2(2)   | -5(2)  | 323.81 | 16.89 | 0.1267 |
| 3 N/O | 2.00(2) | 3(2)   |        |        |       |        |
| 3 N/O | 2.16(2) | 2(2)   | -4(2)  | 314.04 | 16.38 | 0.1229 |
| 6 N/O | 2.09(1) | 5(1)   |        |        |       |        |
| 1 N/O | 3.96(8) | 0(8)   | -3(2)  | 327.88 | 17.1  | 0.1283 |
| 4 N/O | 2.00(2) | 3(2)   |        |        |       |        |
| 3 N/O | 2.15(2) | 2(2)   | -6(2)  | 349.45 | 18.23 | 0.1367 |
| 5 N/O | 2.01(2) | 4(2)   |        |        |       |        |
| 2 N/O | 2.17(2) | 2(2)   | -6(2)  | 328.53 | 18.18 | 0.1364 |
| 2 S   | 2.21(2) | 1(2)   |        |        |       |        |
| 1 S   | 2.08(3) | 0(2)   | -24(5) | 533.95 | 27.85 | 0.209  |
| 2 S   | 2.22(3) | 2(2)   |        |        |       |        |
| 2 S   | 2.11(3) | 3(2)   | -24(4) | 464.41 | 24.23 | 0.1817 |
| 3 S   | 2.20(2) | 4(2)   |        |        |       |        |
| 1 S   | 2.07(3) | 1(2)   | -24(4) | 462.24 | 24.11 | 0.1809 |
| 4 S   | 2.18(2) | 7(1)   |        |        |       |        |
| 1 S   | 1.5(2)  | 34(50) | -23(4) | 482.77 | 25.18 | 0.1889 |
| 3 S   | 2.13(4) | 6(4)   |        |        |       |        |
| 2 S   | 2.24(4) | 4(4)   | -23(4) | 439.55 | 22.39 | 0.172  |
| 5 S   | No fit  |        |        |        |       |        |
| 1 S   |         |        |        |        |       |        |
| 4 S   | 2.19(2) | 7(2)   |        |        |       |        |
| 2 S   | 2.33(9) | 14(16) | -19(4) | 414.02 | 21.6  | 0.162  |
| 3 S   | 2.18(2) | 6(2)   |        |        |       |        |
| 3 S   | 2.28(9) | 16(12) | -19(5) | 417.84 | 21.8  | 0.1635 |
| 6 S   | 2.16(2) | 10(1)  |        |        |       |        |
| 1 S   | 0.96(5) | 44(25) | -28(5) | 382.25 | 19.94 | 0.1496 |
| 4 S   | 2.20(2) | 7(1)   |        |        |       |        |
| 3 S   | 2.36(5) | 16(9)  | -17(3) | 384.49 | 20.06 | 0.1505 |
| 2 N/O | 2.00(3) | 0(2)   |        |        |       |        |
| 1 S   | 2.24(2) | 0(1)   | -13(5) | 546.73 | 28.52 | 0.214  |

---

|              |                    |                  |        |        |       |        |
|--------------|--------------------|------------------|--------|--------|-------|--------|
| 1 N/O<br>2 S | 1.95(4)<br>2.20(2) | 0(3)<br>3(1)     | -20(5) | 532.73 | 27.79 | 0.2085 |
| 2 N/O<br>2 S | 1.98(3)<br>2.22(2) | 2(2)<br>3(1)     | -17(4) | 456.8  | 23.83 | 0.1788 |
| 3 N/O<br>1 S | 2.02(2)<br>2.25(2) | 2(2)<br>1(1)     | -11(4) | 452.07 | 23.58 | 0.1769 |
| 1 N/O<br>3 S | 0.9(2)<br>2.18(2)  | 4(6)<br>6(1)     | -22(4) | 583.14 | 30.42 | 0.2282 |
| 1 N/O<br>4 S | 0.10(6)<br>2.18(2) | 250(205)<br>7(1) | -23(4) | 483.43 | 25.22 | 0.1892 |
| 4 N/O<br>1 S | 2.04(2)<br>2.26(2) | 4(2)<br>2(2)     | -10(3) | 403.36 | 21.04 | 0.1578 |
| 2 N/O<br>3 S | 0.9(1)<br>2.18(2)  | 6(5)<br>6(1)     | -22(4) | 579.72 | 30.24 | 0.2269 |
| 3 N/O<br>2 S | 2.00(3)<br>2.23(2) | 4(2)<br>4(2)     | -15(4) | 430.61 | 22.46 | 0.1685 |
| 5 N/O<br>1 S | 2.10(1)<br>2.61(3) | 4(1)<br>7(4)     | -2(1)  | 309.92 | 16.16 | 0.1213 |
| 1 N/O<br>5 S | No fit             |                  |        |        |       |        |
| 4 N/O<br>2 S | 2.04(4)<br>2.24(3) | 6(3)<br>7(3)     | -12(4) | 416.19 | 21.17 | 0.1629 |
| 2 N/O<br>4 S | 1.28(9)<br>2.18(2) | 11(10)<br>7(1)   | -23(4) | 492.77 | 25.7  | 0.1928 |
| 3 N/O<br>3 S | 2.02(5)<br>2.22(3) | 7(4)<br>8(2)     | -16(4) | 432.2  | 22.54 | 0.1691 |
| 6 N/O<br>1 S | 2.10(1)<br>2.60(3) | 5(1)<br>6(4)     | -2(1)  | 268.19 | 13.99 | 0.1049 |
| 1 N/O<br>6 S | No fit             |                  |        |        |       |        |

---

|                                   |                            |                      |                |               |              |               |
|-----------------------------------|----------------------------|----------------------|----------------|---------------|--------------|---------------|
| 5 N/O<br>2 S                      | 2.07(2)<br>2.24(4)         | 6(3)<br>11(6)        |                |               |              |               |
|                                   |                            |                      | -9(3)          | 401.37        | 20.94        | 0.1571        |
| 2 N/O<br>5 S                      | 1.8(2)<br>2.18(2)          | 33(64)<br>9(1)       |                |               |              |               |
|                                   |                            |                      | -23(5)         | 434.51        | 22.66        | 0.17          |
| 4 N/O<br>3 S                      | 2.05(3)<br>2.23(3)         | 7(4)<br>10(4)        |                |               |              |               |
|                                   |                            |                      | -13(4)         | 425.36        | 22.19        | 0.1665        |
| 3 N/O<br>4 S                      | No fit                     |                      |                |               |              |               |
| 4 N/O<br>2 N/O<br>(4 Im)          | 2.00(2)<br>2.15(2)         | 4(1)<br>2(2)         | -1(2)<br>-2(2) | 147.12        | 13.17        | 0.0575        |
| 3 N/O<br>3 N/O<br>(3 Im)          | 1.98(1)<br>2.12(1)         | 2(1)<br>1(1)         |                |               |              |               |
|                                   |                            |                      | -3(1)          | 159.7         | 14.3         | 0.0625        |
| <b>2 N/O<br/>4 N/O<br/>(2 Im)</b> | <b>1.98(4)<br/>2.13(2)</b> | <b>3(2)<br/>4(4)</b> | <b>-3(2)</b>   | <b>117.21</b> | <b>10.49</b> | <b>0.0458</b> |
| 1 N/O<br>5 N/O<br>(1 Im)          | 1.96(3)<br>2.11(1)         | 0(2)<br>3(1)         | -3(1)<br>-3(2) | 166.15        | 14.87        | 0.065         |
| 5 N/O<br>1 N/O<br>(5 Im)          | 2.02(2)<br>2.18(4)         | 5(2)<br>0(3)         |                |               |              |               |
|                                   |                            |                      | 2(3)           | 164.22        | 14.7         | 0.0642        |
| 6 N/O<br>(6 Im)                   | 2.08(1)                    | 4(1)                 | 7(3)           | 259.7         | 19.72        | 0.1016        |
| 6 N/O<br>(5 Im)                   | 2.08(1)                    | 5(1)                 | 6(2)           | 208.09        | 15.8         | 0.0814        |
| 6 N/O<br>(4 Im)                   | 2.08(1)                    | 5(1)                 | 6(2)           | 203.08        | 15.42        | 0.0794        |
| 6 N/O<br>(3 Im)                   | 2.08(1)                    | 5(1)                 | 6(2)           | 200.49        | 15.22        | 0.0784        |
| 6 N/O<br>(2 Im)                   | 2.08(1)                    | 5(1)                 | 6(2)           | 204.97        | 15.56        | 0.0802        |

---

|                         |                |             |             |              |             |               |
|-------------------------|----------------|-------------|-------------|--------------|-------------|---------------|
| 6 N/O<br>(1 Im)         | 2.08(1)        | 5(1)        | 6(2)        | 230.83       | 17.53       | 0.0903        |
| 2 N/O                   | 2.01(4)        | 3(6)        | 0(2)        | 120.05       | 13.09       | 0.0469        |
| 2 N/O<br>(2 Im)         | 2.14(2)        | 2(2)        |             |              |             |               |
| 1 O                     | 1.97(7)        | 8(9)        |             |              |             |               |
| 1 O                     | 2.02(7)        |             |             |              |             |               |
| 1 C                     | 2.64(7)        |             |             |              |             |               |
| 1 C                     | 2.66(7)        |             |             |              |             |               |
| <b>4 N/O<br/>(2 Im)</b> | <b>2.04(2)</b> | <b>4(3)</b> | <b>8(2)</b> | <b>88.19</b> | <b>7.89</b> | <b>0.0345</b> |
| 1 O                     | 2.09(3)        | 3(3)        |             |              |             |               |
| 1 O                     | 2.14(3)        |             |             |              |             |               |
| 1 C                     | 2.76(3)        |             |             |              |             |               |
| 1 C                     | 2.78(3)        |             |             |              |             |               |
| 3 N/O                   | 2.04(5)        | 4(2)        | 3(3)        | 153.53       | 16.74       | 0.06          |
| 1 N/O<br>(2 Im)         | 2.15(4)        | 0(4)        |             |              |             |               |
| 1 O                     | 2.01(9)        | 7(3)        |             |              |             |               |
| 1 O                     | 2.06(9)        |             |             |              |             |               |
| 1 C                     | 2.68(9)        |             |             |              |             |               |
| 1 C                     | 2.70(9)        |             |             |              |             |               |

---



**Table S12.** EXAFS analysis of Ni(JMJD2C)- $\alpha$ KG + substrate ( $k = 2 - 12 \text{ \AA}^{-1}$  fit in r-space with values  $r = 1 - 4.5$ ). Fits included in the text Table 1 are shown in **bold type**.

| Shell | $r(\text{\AA})$ | $\sigma^2(\text{\AA}^2)$ | $\Delta E_0(\text{eV})$ | $\chi^2$ | Red $\chi^2$ | R      |
|-------|-----------------|--------------------------|-------------------------|----------|--------------|--------|
| 2 N/O | 2.10(3)         | 0(2)                     | 1(5)                    | 690.05   | 36.39        | 0.3868 |
| 3 N/O | 2.08(2)         | 0(1)                     | -3(3)                   | 389.61   | 20.54        | 0.2184 |
| 4 N/O | 2.08(1)         | 1(1)                     | -3(2)                   | 273.88   | 14.44        | 0.1535 |
| 5 N/O | 2.09(1)         | 2(1)                     | -3(2)                   | 220.66   | 11.63        | 0.1237 |
| 6 N/O | 2.09(1)         | 3(1)                     | -4(1)                   | 207.96   | 10.96        | 0.1165 |
| 7 N/O | 2.09(1)         | 5(1)                     | -4(1)                   | 225.16   | 11.87        | 0.1262 |
| 2 S   | 2.17(2)         | 2(1)                     | -24(6)                  | 522.74   | 27.57        | 0.293  |
| 3 S   | 2.17(2)         | 4(1)                     | -23(4)                  | 410.14   | 21.64        | 0.2299 |
| 4 S   | 2.18(2)         | 6(1)                     | -23(4)                  | 360.79   | 19.02        | 0.2022 |
| 5 S   | 2.18(2)         | 8(1)                     | -23(3)                  | 346.22   | 18.26        | 0.194  |
| 6 S   | 2.18(2)         | 9(1)                     | -23(3)                  | 351.57   | 18.54        | 0.197  |
| 7 S   | 2.19(2)         | 11(1)                    | -23(3)                  | 368.29   | 19.42        | 0.2064 |
| 2 N/O | 2.08(6)         | 0(3)                     |                         |          |              |        |
| 1 N/O | 2.1(3)          | 6(36)                    | -1(6)                   | 471.44   | 27.79        | 0.2642 |
| 2 N/O | 2.1(3)          | 1(25)                    |                         |          |              |        |
| 2 N/O | 2.1(3)          | 0(9)                     | -2(3)                   | 265.63   | 15.66        | 0.1489 |
| 3 N/O | 2.07(8)         | 0(7)                     |                         |          |              |        |
| 1 N/O | 2.1(3)          | 0(25)                    | -3(3)                   | 264.01   | 15.56        | 0.148  |
| 4 N/O | 2.07(2)         | 1(3)                     |                         |          |              |        |
| 1 N/O | 2.18(8)         | 0(10)                    | -3(2)                   | 205.38   | 12.11        | 0.1151 |
| 3 N/O | 2.06(4)         | 0(3)                     |                         |          |              |        |
| 2 N/O | 2.16(7)         | 0(10)                    | -2(2)                   | 202.82   | 11.95        | 0.1137 |
| 5 N/O | 2.08(1)         | 1(1)                     |                         |          |              |        |
| 1 N/O | 2.23(5)         | 0(6)                     | -2(2)                   | 188.86   | 11.13        | 0.1058 |
| 4 N/O | 2.07(1)         | 2(2)                     |                         |          |              |        |

|       |         |         |        |        |       |        |
|-------|---------|---------|--------|--------|-------|--------|
| 2 N/O | 2.19(3) | 4(4)    | -2(2)  | 183.9  | 10.84 | 0.103  |
| 3 N/O | 2.06(3) | 2(2)    |        |        |       |        |
| 3 N/O | 2.16(4) | 7(4)    | -2(2)  | 185.41 | 10.93 | 0.1039 |
| 6 N/O | 2.09(1) | 3(1)    |        |        |       |        |
| 1 N/O | 2.27(6) | 1(6)    | -2(2)  | 198.2  | 11.68 | 0.1111 |
| 4 N/O | 2.08(1) | 1(1)    |        |        |       |        |
| 3 N/O | 2.20(5) | 9(9)    | -2(2)  | 194.45 | 11.46 | 0.109  |
| 5 N/O | 2.08(1) | 2(1)    |        |        |       |        |
| 2 N/O | 2.23(6) | 9(7)    | -2(2)  | 194.79 | 11.48 | 0.1092 |
| 2 S   | 2.15(3) | 0(2)    |        |        |       |        |
| 1 S   | 2.28(6) | 0(5)    | -21(6) | 368.19 | 21.7  | 0.2064 |
| 2 S   | 2.15(2) | 0(2)    |        |        |       |        |
| 2 S   | 2.29(3) | 2(3)    | -18(4) | 301.77 | 17.79 | 0.1691 |
| 3 S   | 2.18(2) | 4(1)    |        |        |       |        |
| 1 S   | 2.95(9) | 7(11)   | -22(4) | 377.81 | 22.27 | 0.2118 |
| 4 S   | 2.17(2) | 6(1)    |        |        |       |        |
| 1 S   | 0.1(1)  | 210(63) | -24(4) | 350.62 | 20.67 | 0.1965 |
| 3 S   | 2.17(2) | 2(1)    |        |        |       |        |
| 2 S   | 2.33(3) | 3(3)    | -17(3) | 276.7  | 16.31 | 0.1551 |
| 5 S   | No fit  |         |        |        |       |        |
| 1 S   |         |         |        |        |       |        |
| 4 S   | 2.19(2) | 4(1)    |        |        |       |        |
| 2 S   | 2.36(3) | 4(3)    | -17(3) | 263.12 | 15.51 | 0.1475 |
| 3 S   | 2.18(2) | 3(1)    |        |        |       |        |
| 3 S   | 2.22(3) | 7(4)    | -16(3) | 259.29 | 15.29 | 0.1453 |
| 6 S   | 2.15(2) | 8(1)    |        |        |       |        |
| 1 S   | 0.98(2) | 23(6)   | -34(4) | 263.67 | 15.54 | 0.1478 |
| 4 S   | 2.19(2) | 4(1)    |        |        |       |        |
| 3 S   | 2.36(3) | 8(3)    | -16(3) | 251.79 | 14.84 | 0.1411 |
| 5 S   | 2.18(2) | 8(1)    |        |        |       |        |
| 2 S   | 3.48(6) | 6(6)    | -24(3) | 313.63 | 18.49 | 0.1758 |

---

|              |                    |                |        |        |       |        |
|--------------|--------------------|----------------|--------|--------|-------|--------|
| 2 N/O<br>1 S | 2.06(4)<br>2.28(7) | 0(3)<br>5(6)   |        |        |       |        |
|              |                    |                | -7(6)  | 445.96 | 26.29 | 0.25   |
| 1 N/O<br>2 S | 1.40(3)<br>2.17(2) | 2(3)<br>2(1)   |        |        |       |        |
|              |                    |                | -23(6) | 456.04 | 26.88 | 0.2556 |
| 2 N/O<br>2 S | 2.03(3)<br>2.24(4) | 0(2)<br>5(3)   |        |        |       |        |
|              |                    |                | -13(5) | 328.73 | 19.38 | 0.1842 |
| 3 N/O<br>1 S | 2.08(2)<br>2.4(3)  | 0(1)<br>28(46) |        |        |       |        |
|              |                    |                | -3(4)  | 344.31 | 20.3  | 0.193  |
| 1 N/O<br>3 S | 2.53(7)<br>2.17(2) | 0(6)<br>4(1)   |        |        |       |        |
|              |                    |                | -23(4) | 351.36 | 20.71 | 0.1969 |
| 1 N/O<br>4 S | No fit             |                |        |        |       |        |
| 4 N/O<br>1 S | 2.07(1)<br>2.34(5) | 1(1)<br>8(6)   |        |        |       |        |
|              |                    |                | -5(2)  | 226.3  | 13.34 | 0.1268 |
| 2 N/O<br>3 S | 1.38(4)<br>2.17(2) | 7(5)<br>4(1)   |        |        |       |        |
|              |                    |                | -23(5) | 376.14 | 22.17 | 0.2108 |
| 3 N/O<br>2 S | 2.06(2)<br>2.31(4) | 0(1)<br>10(4)  |        |        |       |        |
|              |                    |                | -7(3)  | 253.19 | 14.92 | 0.1419 |
| 5 N/O<br>1 S | 2.09(1)<br>2.5(2)  | 2(1)<br>23(27) |        |        |       |        |
|              |                    |                | -3(2)  | 200.97 | 11.84 | 0.1126 |
| 1 N/O<br>5 S | No fit             |                |        |        |       |        |
| 4 N/O<br>2 S | 2.08(1)<br>2.38(8) | 1(1)<br>20(10) |        |        |       |        |
|              |                    |                | -5(2)  | 219.38 | 12.93 | 0.1229 |
| 2 N/O<br>4 S | No fit             |                |        |        |       |        |
| 3 N/O<br>3 S | 1.85(9)<br>2.17(2) | 16(14)<br>4(1) |        |        |       |        |
|              |                    |                | -26(6) | 353.9  | 20.86 | 0.1984 |
| 6 N/O<br>1 S | 2.09(1)<br>1.9(1)  | 4(1)<br>34(40) |        |        |       |        |
|              |                    |                | -2(2)  | 204.88 | 12.08 | 0.1148 |

---

|                              |                    |                 |        |        |       |        |
|------------------------------|--------------------|-----------------|--------|--------|-------|--------|
| 1 N/O<br>6 S                 | 6(2)<br>2.18(2)    | 0(187)<br>9(1)  | -23(3) | 350.69 | 20.67 | 0.1966 |
| 5 N/O<br>2 S                 | 2.09(1)<br>2.5(1)  | 2(1)<br>28(20)  | -3(2)  | 190.2  | 11.21 | 0.1066 |
| 2 N/O<br>5 S                 | 0.8(3)<br>2.18(2)  | 28(269)<br>8(1) | -23(4) | 343.22 | 20.23 | 0.1924 |
| 4 N/O<br>3 S                 | 2.08(1)<br>2.4(1)  | 1(1)<br>29(12)  | -4(2)  | 210.03 | 12.38 | 0.1177 |
| 3 N/O<br>4 S                 | 1.79(4)<br>2.16(2) | 11(7)<br>5(1)   | -28(4) | 310.38 | 18.3  | 0.174  |
| 4 N/O<br>2 N/O<br>(4 Im)     | 2.06(1)<br>2.21(5) | 1(1)<br>4(4)    | 5(3)   | 78.86  | 8.8   | 0.0442 |
| 3 N/O<br>3 N/O<br>(3 Im)     | 2.04(2)<br>2.15(3) | 2(2)<br>4(3)    | 1(2)   | 81.38  | 9.08  | 0.0456 |
| 2 N/O<br>4 N/O<br><br>(2 Im) | 2.04(2)<br>2.13(3) | 2(2)<br>5(3)    | 0(2)   | 86.9   | 9.69  | 0.0487 |
| 1 N/O<br>5 N/O<br>(1 Im)     | 2.1(2)<br>2.09(4)  | 6(67)<br>3(7)   | -2(2)  | 126.38 | 14.1  | 0.0708 |
| 5 N/O<br>1 N/O<br>(5 Im)     | 2.06(2)<br>2.21(6) | 2(1)<br>0(5)    | 4(3)   | 94.31  | 10.52 | 0.0528 |
| 6 N/O<br>(6 Im)              | 2.08(1)            | 3(1)            | 6(2)   | 91.41  | 8.34  | 0.0512 |
| 6 N/O<br>(5 Im)              | 2.08(1)            | 3(1)            | 6(1)   | 100.19 | 9.14  | 0.0561 |
| 6 N/O<br>(4 Im)              | 2.08(1)            | 3(1)            | 5(2)   | 97.42  | 8.88  | 0.0546 |

|                          |                    |              |             |              |             |               |
|--------------------------|--------------------|--------------|-------------|--------------|-------------|---------------|
| 6 N/O<br>(3 Im)          | 2.07(1)            | 3(1)         | 4(2)        | 114.85       | 10.47       | 0.0643        |
| <b>6 N/O<br/>(2 Im)</b>  | <b>2.08(1)</b>     | <b>3(1)</b>  | <b>6(2)</b> | <b>85.34</b> | <b>7.78</b> | <b>0.0478</b> |
| 6 N/O<br>(1 Im)          | 2.08(1)            | 3(1)         | 6(2)        | 109.14       | 9.95        | 0.0611        |
| 2 N/O<br>2 N/O<br>(2 Im) | 2.04(6)<br>2.14(6) | 0(5)<br>8(2) | 1(3)        | 45.5         | 6.55        | 0.0256        |
| 1 O                      | 2.00(1)            | 11(6)        |             |              |             |               |
| 1 O                      | 2.05(1)            |              |             |              |             |               |
| 1 C                      | 2.67(1)            |              |             |              |             |               |
| 1 C                      | 2.69(1)            |              |             |              |             |               |
| <b>4 N/O<br/>(2 Im)</b>  | <b>2.07(1)</b>     | <b>1(1)</b>  | <b>3(3)</b> | <b>52.44</b> | <b>5.85</b> | <b>0.0294</b> |
| 1 O                      | <b>1.96(8)</b>     | <b>10(9)</b> |             |              |             |               |
| 1 O                      | <b>2.01(8)</b>     |              |             |              |             |               |
| 1 C                      | <b>2.63(8)</b>     |              |             |              |             |               |
| 1 C                      | <b>2.65(8)</b>     |              |             |              |             |               |
| 3 N/O<br>1 N/O<br>(2 Im) | 2.05(3)<br>2.18(7) | 9(3)<br>0(3) | 2(3)        | 43.8         | 6.3         | 0.0246        |
| 1 O                      | 1.96(1)            | 12(2)        |             |              |             |               |
| 1 O                      | 2.01(1)            |              |             |              |             |               |
| 1 C                      | 2.63(1)            |              |             |              |             |               |
| 1 C                      | 2.65(1)            |              |             |              |             |               |

**Table S13.** Zn *K*-edge EXAFS analysis of Fe(JMJD2C) ( $k = 2 - 13.5 \text{ \AA}^{-1}$  fit in *r*-space with values  $r = 1 - 4.5$ ). Fits included in the text Table 1 are shown in **bold type**.

| Shell | $r(\text{\AA})$ | $\sigma^2(\text{\AA}^2)$ | $\Delta E_0(\text{eV})$ | $\chi^2$ | Red $\chi^2$ | R      |
|-------|-----------------|--------------------------|-------------------------|----------|--------------|--------|
| 2 N/O | 2.23(2)         | 0(2)                     | 5(4)                    | 7875.74  | 353.64       | 0.3818 |
| 3 N/O | 2.23(1)         | 0(1)                     | 5(2)                    | 4553.88  | 204.48       | 0.2207 |
| 4 N/O | 2.23(1)         | 0(1)                     | 5(1)                    | 3265.62  | 146.63       | 0.1583 |
| 5 N/O | 2.23(1)         | 1(1)                     | 4(1)                    | 3011.08  | 135.2        | 0.1459 |
| 6 N/O | 2.23(1)         | 2(1)                     | 4(1)                    | 3347.81  | 150.32       | 0.1623 |
| 7 N/O | 2.23(1)         | 3(1)                     | 3(1)                    | 4129.37  | 185.41       | 0.2001 |
| 2 S   | 2.33(1)         | 1.1(5)                   | -9(2)                   | 2341.51  | 105.13       | 0.1135 |
| 3 S   | 2.33(1)         | 2.9(3)                   | -9(1)                   | 809.69   | 36.35        | 0.0392 |
| 4 S   | 2.331(4)        | 4(.5(2)                  | -10(1)                  | 442.01   | 19.84        | 0.0214 |
| 5 S   | 2.330(5)        | 5.9(3)                   | -11(1)                  | 738.09   | 33.14        | 0.0357 |
| 6 S   | 2.329(7)        | 7.3(4)                   | -11(1)                  | 1415.73  | 63.57        | 0.0686 |
| 7 S   | 2.33(1)         | 9(1)                     | -12(2)                  | 2301.14  | 103.32       | 0.1115 |
| 2 N/O | 2.24(2)         | 0(2)                     |                         |          |              |        |
| 1 N/O | 3(1)            | 66(433)                  | 7(4)                    | 7275.48  | 358.91       | 0.3814 |
| 2 N/O | 2.24(2)         | 0(2)                     |                         |          |              |        |
| 2 N/O | 2.3(3)          | 28(43)                   | 6(3)                    | 7523.24  | 371.14       | 0.3647 |
| 3 N/O | 2.24(1)         | 0(1)                     |                         |          |              |        |
| 1 N/O | 3(3)            | 103(1254)                | 6(2)                    | 4550.26  | 224.47       | 0.2205 |
| 4 N/O | 2.23(1)         | 0(1)                     |                         |          |              |        |
| 1 N/O | 4.5(1)          | 0(12)                    | 5(1)                    | 3244.69  | 160.06       | 0.1573 |
| 3 N/O | 2.23(1)         | 0(1)                     |                         |          |              |        |
| 2 N/O | 2.1(4)          | 88(19)                   | 5(3)                    | 4924.76  | 242.95       | 0.2387 |
| 5 N/O | 2.23(1)         | 1(1)                     |                         |          |              |        |
| 1 N/O | 3.74(7)         | 0(7)                     | 4(1)                    | 2898.02  | 142.96       | 0.1404 |
| 4 N/O | 2.23(1)         | 0.2(6)                   |                         |          |              |        |

---

|       |         |        |        |         |        |        |
|-------|---------|--------|--------|---------|--------|--------|
| 2 N/O | 2.60(2) | 1(2)   | 4(2)   | 2701.15 | 133.25 | 0.1309 |
| 3 N/O | 2.17(5) | 4(7)   |        |         |        |        |
| 3 N/O | 2.24(3) | 0(2)   | 1(2)   | 3346.11 | 165.07 | 0.1622 |
| 6 N/O | 2.23(1) | 2(1)   |        |         |        |        |
| 1 N/O | 1.69(7) | 21(16) | 5(1)   | 2637.64 | 130.12 | 0.1278 |
| 4 N/O | 2.16(4) | 6(5)   |        |         |        |        |
| 3 N/O | 2.24(2) | 0(1)   | 0(2)   | 3859.21 | 190.38 | 0.187  |
| 5 N/O | 2.23(1) | 1(1)   |        |         |        |        |
| 2 N/O | 1.65(7) | 48(22) | 5(1)   | 2337.26 | 115.3  | 0.1133 |
| 2 S   | 2.36(1) | 0(1)   |        |         |        |        |
| 1 S   | 2.26(1) | 0(1)   | -10(1) | 589.77  | 29.09  | 0.0285 |
| 2 S   | 2.27(1) | 3(1)   |        |         |        |        |
| 2 S   | 2.36(1) | 1(1)   | -12(1) | 316.52  | 15.61  | 0.0153 |
| 3 S   | 2.23(1) | 1(1)   |        |         |        |        |
| 1 S   | 2.35(1) | 2(1)   | -12(1) | 323.14  | 15.94  | 0.0156 |
| 4 S   | 4.3(1)  | 14(20) |        |         |        |        |
| 1 S   | 2.33(1) | 4(1)   | -10(1) | 428.49  | 21.13  | 0.0207 |
| 3 S   | 2.25(2) | 9(3)   |        |         |        |        |
| 2 S   | 2.34(1) | 3(1)   | -13(1) | 434.91  | 21.45  | 0.021  |
| 5 S   | No fit  |        |        |         |        |        |
| 1 S   |         |        |        |         |        |        |
| 4 S   | 2.7(2)  | 52(42) |        |         |        |        |
| 2 S   | 2.33(1) | 4(1)   | -10(1) | 428.94  | 21.16  | 0.0207 |
| 3 S   | 2.26(3) | 16(4)  |        |         |        |        |
| 3 S   | 2.33(5) | 3(1)   | -14(2) | 583.07  | 28.76  | 0.0282 |
| 6 S   | 2.33(1) | 7(1)   |        |         |        |        |
| 1 S   | 1.81(6) | 56(13) | -10(1) | 1007.27 | 49.69  | 0.0488 |

---

|       |          |        |        |         |        |        |
|-------|----------|--------|--------|---------|--------|--------|
| 4 S   | 2.33(1)  | 4(1)   |        |         |        |        |
| 3 S   | 2.7(2)   | 63(41) | -10(1) | 424.35  | 20.93  | 0.0305 |
| 5 S   | 2.33(1)  | 6(1)   |        |         |        |        |
| 2 S   | 2.0(1)   | 52(21) | -10(1) | 622.06  | 30.68  | 0.0301 |
| 2 N/O | 2.17(4)  | 2(2)   |        |         |        |        |
| 1 S   | 2.35(2)  | 0(1)   | -5(4)  | 2283.94 | 112.67 | 0.1167 |
| 1 N/O | 2.12(2)  | 0(2)   |        |         |        |        |
| 2 S   | 2.34(1)  | 1(1)   | -8(2)  | 761.83  | 37.58  | 0.0369 |
| 2 N/O | 2.15(1)  | 1(1)   |        |         |        |        |
| 2 S   | 2.359(5) | 1.1(3) | -5(1)  | 334.81  | 16.51  | 0.0162 |
| 3 N/O | 2.20(1)  | 1(1)   |        |         |        |        |
| 1 S   | 2.39(1)  | 0(1)   | 1(1)   | 730.27  | 36.02  | 0.0354 |
| 1 N/O | 2.11(2)  | 1(1)   |        |         |        |        |
| 3 S   | 2.342(4) | 2.8(3) | -9(1)  | 332.07  | 16.38  | 0.016  |
| 1 N/O | 1.4(1)   | 37(25) |        |         |        |        |
| 4 S   | 2.333(4) | 4.5(2) | -10(1) | 393.93  | 19.43  | 0.019  |
| 4 N/O | 2.24(1)  | 1(1)   |        |         |        |        |
| 1 S   | 1.93(4)  | 14(5)  | 6(1)   | 2715.76 | 133.97 | 0.1316 |
| 2 N/O | 2.17(3)  | 8(3)   |        |         |        |        |
| 3 S   | 2.343(5) | 3.4(3) | -7(1)  | 345.85  | 17.06  | 0.0167 |
| 3 N/O | 2.17(1)  | 4(1)   |        |         |        |        |
| 2 S   | 2.36(1)  | 1.9(4) | -4(1)  | 358.04  | 17.66  | 0.0173 |
| 5 N/O | 2.19(1)  | 5(1)   |        |         |        |        |
| 1 S   | 2.37(1)  | 0(1)   | -1(1)  | 859.65  | 42.4   | 0.0416 |
| 1 N/O | 1.5(2)   | 48(53) |        |         |        |        |
| 5 S   | 2.33(1)  | 5.9(3) | -10(1) | 704.01  | 34.73  | 0.0341 |
| 2 N/O | 2.28(7)  | 23(52) |        |         |        |        |
| 4 S   | 2.34(1)  | 4.5(3) | -9(3)  | 375.86  | 18.54  | 0.0182 |
| 4 N/O | 2.20(2)  | 7(2)   |        |         |        |        |



|               |                |             |              |               |              |              |
|---------------|----------------|-------------|--------------|---------------|--------------|--------------|
| 2 S           | 2.354(5)       | 2(1)        | -3(1)        | 444.98        | 21.95        | 0.0215       |
| 3 N/O         | 2.21(3)        | 11(5)       |              |               |              |              |
| 3 S           | 2.344(4)       | 3.5(4)      | -6(1)        | 351.61        | 17.34        | 0.017        |
| 6 N/O         | 2.21(2)        | 7(1)        |              |               |              |              |
| 1 S           | 2.36(1)        | 0(1)        | -1(2)        | 1249.03       | 61.61        | 0.0605       |
| 1 N/O         | 1.7(2)         | 36(42)      |              |               |              |              |
| 6 S           | 2.33(1)        | 7.3(5)      | -11(1)       | 1359.73       | 67.07        | 0.0659       |
| 5 N/O         | 2.22(2)        | 10(2)       |              |               |              |              |
| 2 S           | 2.351(4)       | 2(1)        | -3(2)        | 586.42        | 28.92        | 0.0284       |
| 2 N/O         | 1.5(1)         | 62(43)      |              |               |              |              |
| 5 S           | 2.33(1)        | 5.9(3)      | -10(1)       | 689.22        | 34           | 0.0334       |
| 4 N/O         | 2.24(3)        | 13(6)       |              |               |              |              |
| 3 S           | 2.345(4)       | 3.5(4)      | -5(2)        | 369.94        | 18.25        | 0.0179       |
| 3 N/O         | 2.29(5)        | 24(44)      |              |               |              |              |
| 4 S           | 2.34(1)        | 4.5(3)      | -8(4)        | 355.51        | 17.53        | 0.0172       |
| 2 N/O         | 2.35(1)        | 1(1)        |              |               |              |              |
| (2 Im)        |                |             |              |               |              |              |
| 2 S           | 2.10(2)        | 2(1)        | -6(2)        | 693.49        | 48.59        | 0.0336       |
| 2 N/O         | 2.35(1)        | 1(1)        |              |               |              |              |
| (1 Im)        |                |             |              |               |              |              |
| 2 S           | 2.11(2)        | 2(1)        | -5(2)        | 731.53        | 51.26        | 0.0354       |
| 1 N/O         | 2.1(2)         | 5(26)       |              |               |              |              |
| 1 N/O         | 2.1(1)         | 0(5)        |              |               |              |              |
| (1 Im)        |                |             |              |               |              |              |
| 2 S           | 2.34(1)        | 1(1)        | -8(3)        | 484.74        | 39.5         | 0.0235       |
| <b>1 N/O</b>  | <b>2.08(2)</b> | <b>3(2)</b> |              |               |              |              |
| <b>(1 Im)</b> |                |             |              |               |              |              |
| <b>3 S</b>    | <b>2.34(4)</b> | <b>3(3)</b> | <b>-9(1)</b> | <b>186.44</b> | <b>13.07</b> | <b>0.009</b> |
| 2 N/O         | 2.08(2)        | 9(2)        |              |               |              |              |
| (2 Im)        |                |             |              |               |              |              |
| 3 S           | 2.34(1)        | 3(2)        | -8(1)        | 305.28        | 21.39        | 0.0148       |
| 2 N/O         | 2.08(2)        | 8(2)        |              |               |              |              |
| (1 Im)        |                |             |              |               |              |              |

---

|        |         |       |       |        |       |        |
|--------|---------|-------|-------|--------|-------|--------|
| 3 S    | 2.34(4) | 3(2)  | -8(1) | 274.14 | 19.21 | 0.0132 |
| 1 N/O  | 2.2(2)  | 8(17) |       |        |       |        |
| 1 N/O  | 2.1(1)  | 7(7)  |       |        |       |        |
| (1 Im) |         |       |       |        |       |        |
| 3 S    | 2.34(1) | 3(1)  | -8(2) | 237.31 | 19.34 | 0.0115 |
| 3 N/O  | 2.11(2) | 5(1)  |       |        |       |        |
| (3 Im) |         |       |       |        |       |        |
| 2 S    | 2.35(1) | 1(1)  | -5(2) | 618.1  | 43.31 | 0.0299 |
| 3 N/O  | 2.11(2) | 5(1)  |       |        |       |        |
| (2 Im) |         |       |       |        |       |        |
| 2 S    | 2.35(1) | 1(1)  | -5(2) | 641.71 | 44.96 | 0.0311 |
| 3 N/O  | 2.12(2) | 5(1)  |       |        |       |        |
| 1 Im   |         |       |       |        |       |        |
| 2 S    | 2.35(1) | 1(1)  | -4(2) | 656.47 | 46    | 0.0318 |
| 2 N/O  | 2.09(3) | 8(5)  |       |        |       |        |
| 1 N/O  | 2.16(4) | 0(2)  |       |        |       |        |
| (2 Im) |         |       |       |        |       |        |
| 2 S    | 2.36(1) | 1(1)  | -5(2) | 254.25 | 20.71 | 0.0123 |
| 1 N/O  | 2.06(5) | 10(9) |       |        |       |        |
| 2 N/O  | 2.16(2) | 1(1)  |       |        |       |        |
| (1 Im) |         |       |       |        |       |        |
| 2 S    | 2.36(1) | 2(1)  | -5(1) | 309.56 | 25.21 | 0.0149 |
| 3 N/O  | 2.09(3) | 12(3) |       |        |       |        |
| (3 Im) |         |       |       |        |       |        |
| 3 S    | 2.34(1) | 3(1)  | -8(2) | 330.47 | 23.15 | 0.016  |
| 3 N/O  | 2.10(2) | 12(3) |       |        |       |        |
| (2 Im) |         |       |       |        |       |        |
| 3 S    | 2.34(1) | 3(1)  | -7(1) | 287.47 | 20.14 | 0.0139 |
| 3 N/O  | 2.09(2) | 12(2) |       |        |       |        |
| (1 Im) |         |       |       |        |       |        |
| 3 S    | 2.34(1) | 3(1)  | -8(1) | 265.62 | 18.61 | 0.0128 |
| 2 N/O  | 2.09(5) | 12(8) |       |        |       |        |
| 1 N/O  | 2.22(9) | 6(21) |       |        |       |        |
| (2 Im) |         |       |       |        |       |        |
| 3 S    | 2.34(1) | 3(1)  | -7(2) | 263.16 | 21.44 | 0.0127 |

---

|        |         |        |        |        |       |        |
|--------|---------|--------|--------|--------|-------|--------|
| 1 N/O  | 2.1(1)  | 9(9)   |        |        |       |        |
| 2 N/O  | 2.22(8) | 10(17) |        |        |       |        |
| (1 Im) |         |        |        |        |       |        |
| 3 S    | 2.34(1) | 3(1)   | -6(2)  | 215.36 | 17.55 | 0.0104 |
| 4 N/O  | 2.10(3) | 15(3)  |        |        |       |        |
| (4 Im) |         |        |        |        |       |        |
| 3 S    | 2.34(1) | 3(1)   | -7(2)  | 333.64 | 23.38 | 0.0161 |
| 4 N/O  | 2.10(3) | 15(3)  |        |        |       |        |
| (3 Im) |         |        |        |        |       |        |
| 3 S    | 2.34(1) | 3(1)   | -7(2)  | 324.93 | 22.76 | 0.0157 |
| 4 N/O  | 2.10(2) | 16(3)  |        |        |       |        |
| (2 Im) |         |        |        |        |       |        |
| 3 S    | 2.34(1) | 3(1)   | -8(1)  | 279.8  | 19.6  | 0.0135 |
| 4 N/O  | 2.10(2) | 15(3)  |        |        |       |        |
| (1 Im) |         |        |        |        |       |        |
| 3 S    | 2.34(1) | 3(1)   | -7(1)  | 264.55 | 18.53 | 0.0128 |
| 3N     | 2.26(5) | 5(26)  |        |        |       |        |
| 1 N/O  | 2.09(4) | 6(9)   |        |        |       |        |
| (1 Im) |         |        |        |        |       |        |
| 3 S    | 2.34(4) | 4(5)   | -4(3)  | 206.2  | 16.8  | 0.0099 |
| 2 N/O  | 2.25(4) | 8(19)  |        |        |       |        |
| 2 N/O  | 2.09(5) | 12(8)  |        |        |       |        |
| (2 Im) |         |        |        |        |       |        |
| 3 S    | 2.34(1) | 3(1)   | -6(2)  | 240.1  | 19.56 | 0.0116 |
| 1 N/O  | 2.12(4) | 2(2)   |        |        |       |        |
| 3 N/O  | 2.1(2)  | 34(27) |        |        |       |        |
| (3 Im) |         |        |        |        |       |        |
| 3 S    | 2.34(1) | 3(1)   | -8(3)  | 260.56 | 21.23 | 0.0126 |
| 4 S    | 2.34(1) | 4(1)   |        |        |       |        |
| 1 N/O  | 2.05(9) | 13(1)  | -10(2) | 325.21 | 22.78 | 0.0157 |
| (1 Im) |         |        |        |        |       |        |
| 4 S    | 2.34(1) | 5(1)   |        |        |       |        |
| 2 N/O  | 2.10(7) | 23(13) | -10(1) | 326.56 | 22.88 | 0.0158 |
| (2 Im) |         |        |        |        |       |        |
| 4 S    | 2.34(1) | 5(1)   |        |        |       |        |
| 3 N/O  | 2.13(5) | 26(12) | -9(1)  | 298.84 | 20.94 | 0.0144 |

---

|        |         |        |        |        |       |        |
|--------|---------|--------|--------|--------|-------|--------|
| (3 Im) |         |        |        |        |       |        |
| 4 S    | 2.33(2) | 4(2)   |        |        |       |        |
| 1 N/O  | 2.31(9) | 0(6)   |        |        |       |        |
| 1 N/O  | 2.09(8) | 10(11) | -8(2)  | 218.96 | 21.31 | 0.0106 |
| (1 Im) |         |        |        |        |       |        |
| 4 S    | 2.34(1) | 5(1)   |        |        |       |        |
| 2 N/O  | 2.19(7) | 24(23) | -9(1)  | 251.08 | 17.59 | 0.0121 |
| (1 Im) |         |        |        |        |       |        |
| 4 S    | 2.34(1) | 5(1)   |        |        |       |        |
| 2 N/O  | 2.26(6) | 18(55) |        |        |       |        |
| 1 N/O  | 2.00(7) | 12(12) | -9(4)  | 270.33 | 22.03 | 0.0131 |
| (1 Im) |         |        |        |        |       |        |
| 4 S    | 2.33(1) | 5(1)   |        |        |       |        |
| 1 N/O  | 2.50(2) | 0(2)   |        |        |       |        |
| 2 N/O  | 2.08(6) | 22(12) | -12(1) | 191.98 | 15.64 | 0.0093 |
| (2 Im) |         |        |        |        |       |        |
| 4 S    | 2.34(1) | 5(1)   |        |        |       |        |
| 3 N/O  | 2.12(7) | 31(16) | -10(1) | 284.2  | 19.91 | 0.0137 |
| (1 Im) |         |        |        |        |       |        |
| 4 S    | 2.34(1) | 5(1)   |        |        |       |        |
| 3 N/O  | 2.22(5) | 18(13) | -7(2)  | 284.73 | 19.95 | 0.0138 |
| (2 Im) |         |        |        |        |       |        |
| 1 S    | 2.34(5) | 3(3)   |        |        |       |        |
| 2 S    | 2.34(5) | 3(5)   | -9(2)  | 314.38 | 25.62 | 0.0152 |
| 1 N/O  | 2.07(3) | 3(3)   |        |        |       |        |
| (1 Im) |         |        |        |        |       |        |

---
